# Supplementary material
Source: PubMed Central journal article supplement (PMC4749511)

# Supplementary Material

## 8-Hydroxyquinoline-Based Inhibitors of the Rce1 Protease Disrupt Ras Membrane Localization in Human Cells

Idrees Mohammed,<sup>a,†</sup> Shahienaz E. Hampton,<sup>a,†</sup> Louise Ashall,<sup>a,†</sup> Emily R. Hildebrandt,<sup>c,†</sup> Robert A. Kutlik,<sup>b</sup> Surya P. Manandhar,<sup>c</sup> Brandon J. Floyd,<sup>b</sup> Haley E. Smith,<sup>a</sup> Jonathan K. Dozier,<sup>d</sup> Mark D. Distefano,<sup>d</sup> Walter K. Schmidt,<sup>c</sup> and Timothy M. Dore<sup>a,b,\*</sup>

<sup>a</sup>New York University Abu Dhabi, PO Box 129188, Abu Dhabi, United Arab Emirates

<sup>b</sup>Department of Chemistry, University of Georgia, Athens, GA 30602

<sup>c</sup>Department of Biochemistry & Molecular Biology, University of Georgia, Athens, GA 30602

<sup>d</sup>Department of Chemistry, University of Minnesota, Minneapolis, MN 55455

### Table of Contents

|                                                                                |    |
|--------------------------------------------------------------------------------|----|
| Figure S1. Rce1 inhibitor toxicity in human cells .....                        | S2 |
| Figure S2. ORTEP diagram for compound <b>28</b> .....                          | S3 |
| Figure S2. ORTEP diagram for compound <b>36</b> .....                          | S3 |
| Proteolysis assay IC <sub>50</sub> determinations for selected compounds ..... | S4 |
| <sup>1</sup> H and <sup>13</sup> C NMR Spectra .....                           | S6 |

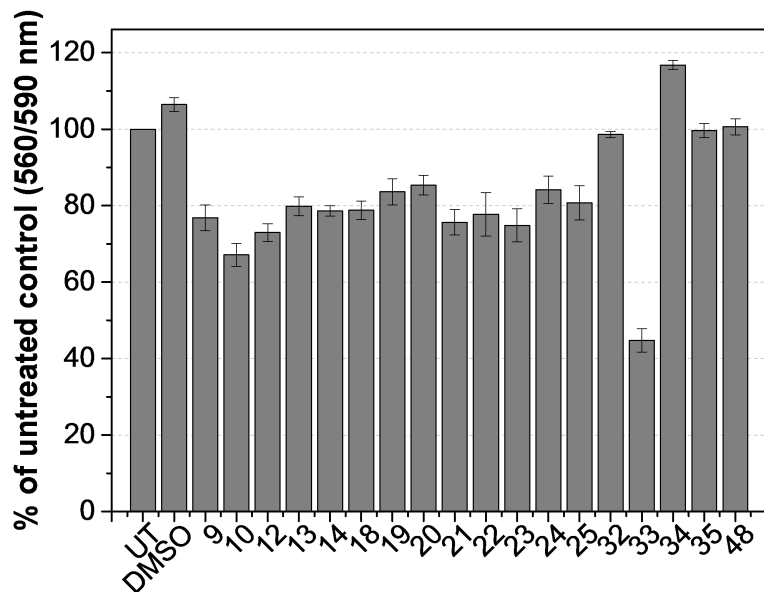

**Figure S1. Rce1 inhibitor toxicity in human cells.** Compounds were added to HCT-116 cells at 25  $\mu$ M then incubated for 20 h. U= untreated, DMSO= DMSO (0.4%) treated cells. Cell viability was measured using the CellTiter-Blue assay (Promega). Average of three independent experiments. Error bars indicate SEM.

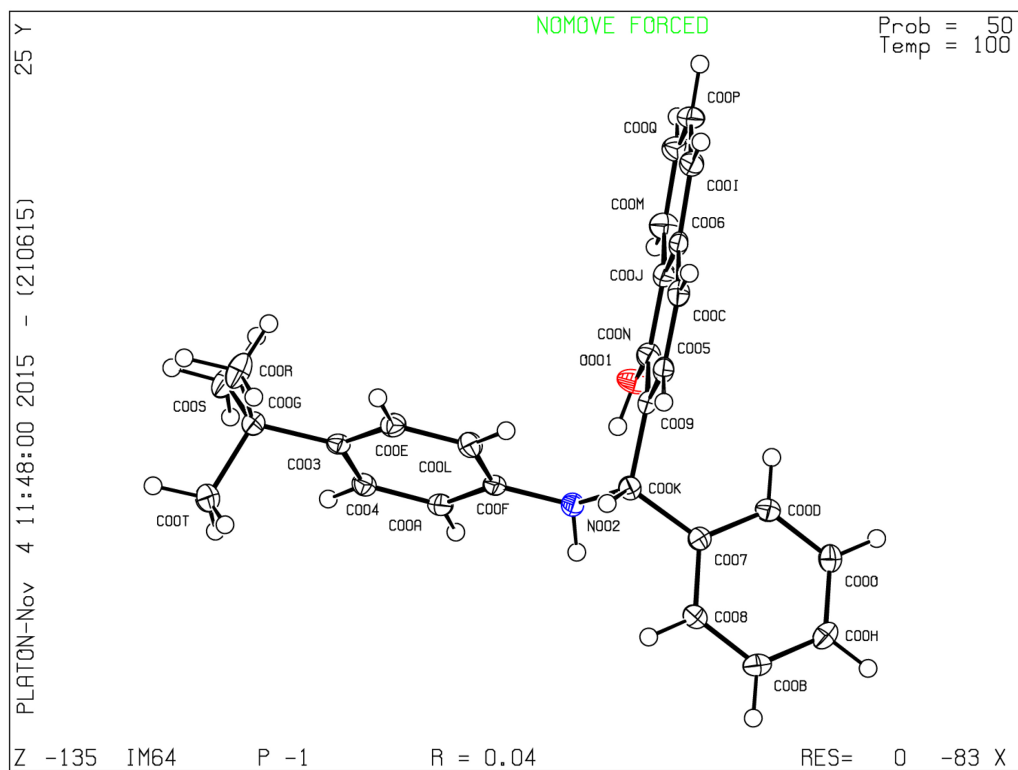

**Figure S2.** ORTEP diagram of compound **28** generated by uploading .cif file at <http://checkcif.iucr.org/>

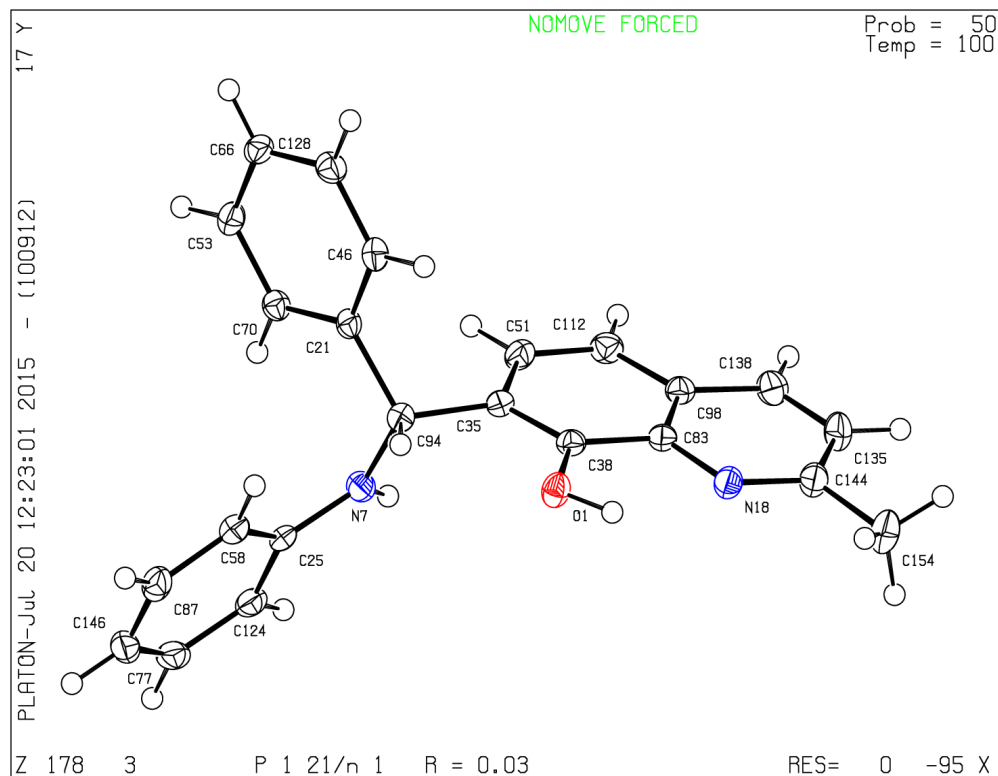

**Figure S3.** ORTEP diagram of compound **36** generated by uploading .cif file at <http://checkcif.iucr.org/>

## Proteolysis assay IC<sub>50</sub> determinations for selected compounds

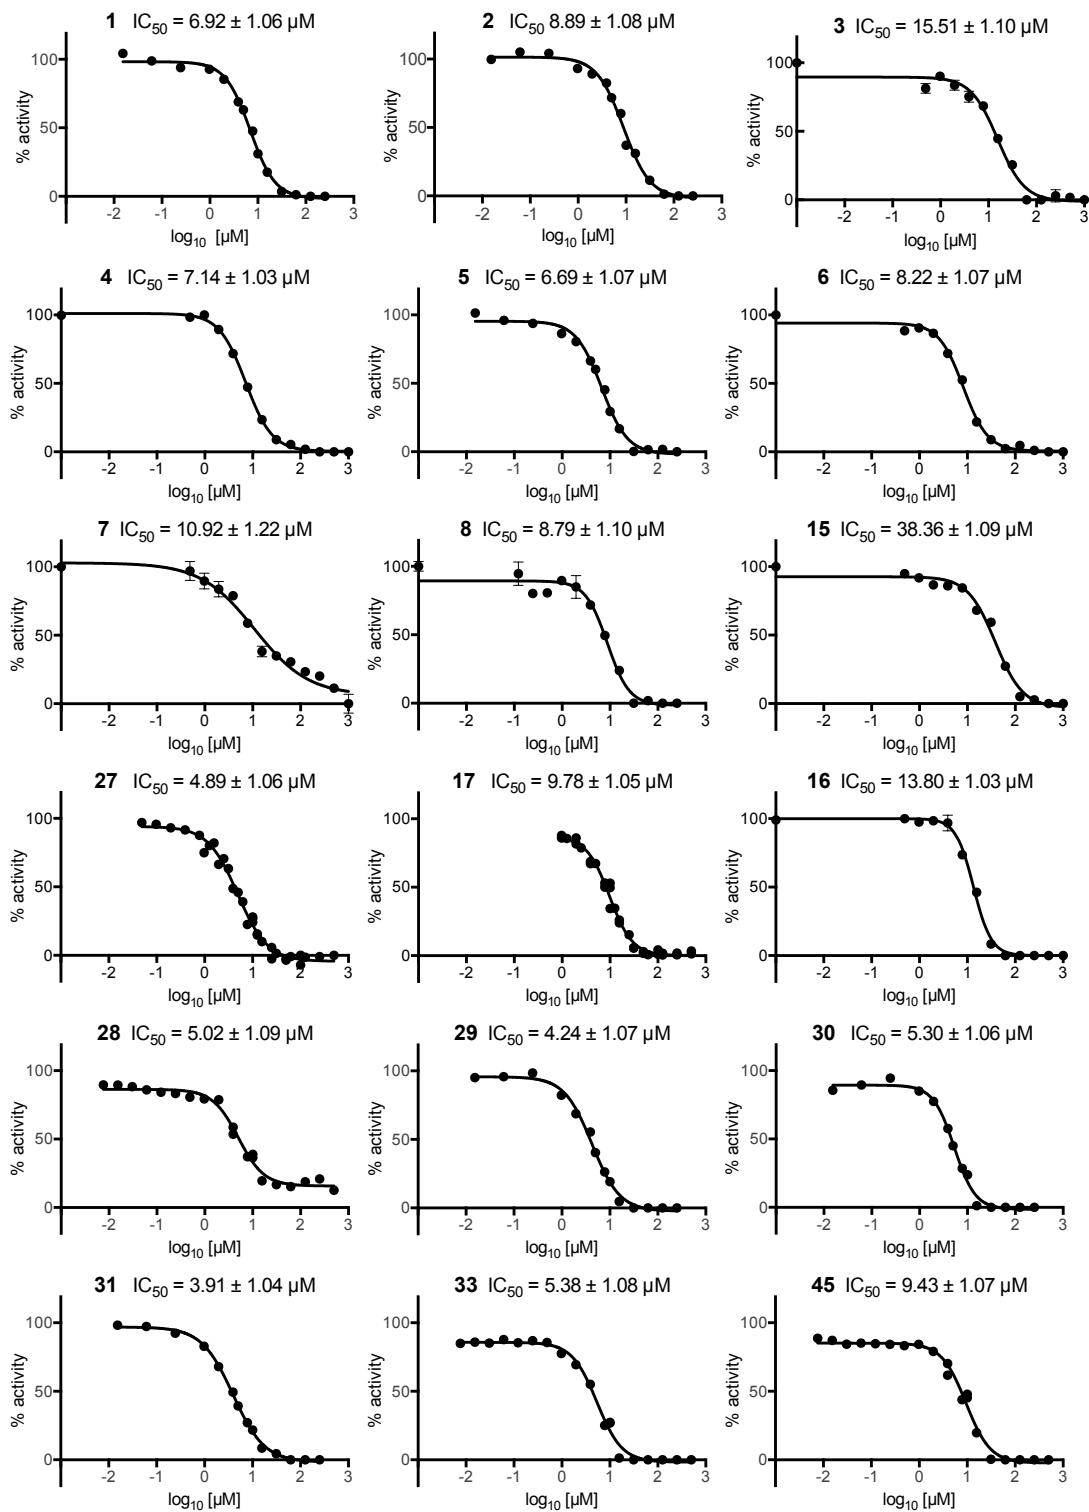

## Proteolysis assay IC<sub>50</sub> determinations for selected compounds (continued)

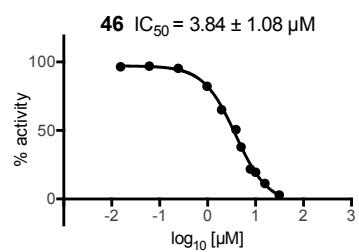

# $^1\text{H}$ and $^{13}\text{C}$ NMR Spectra

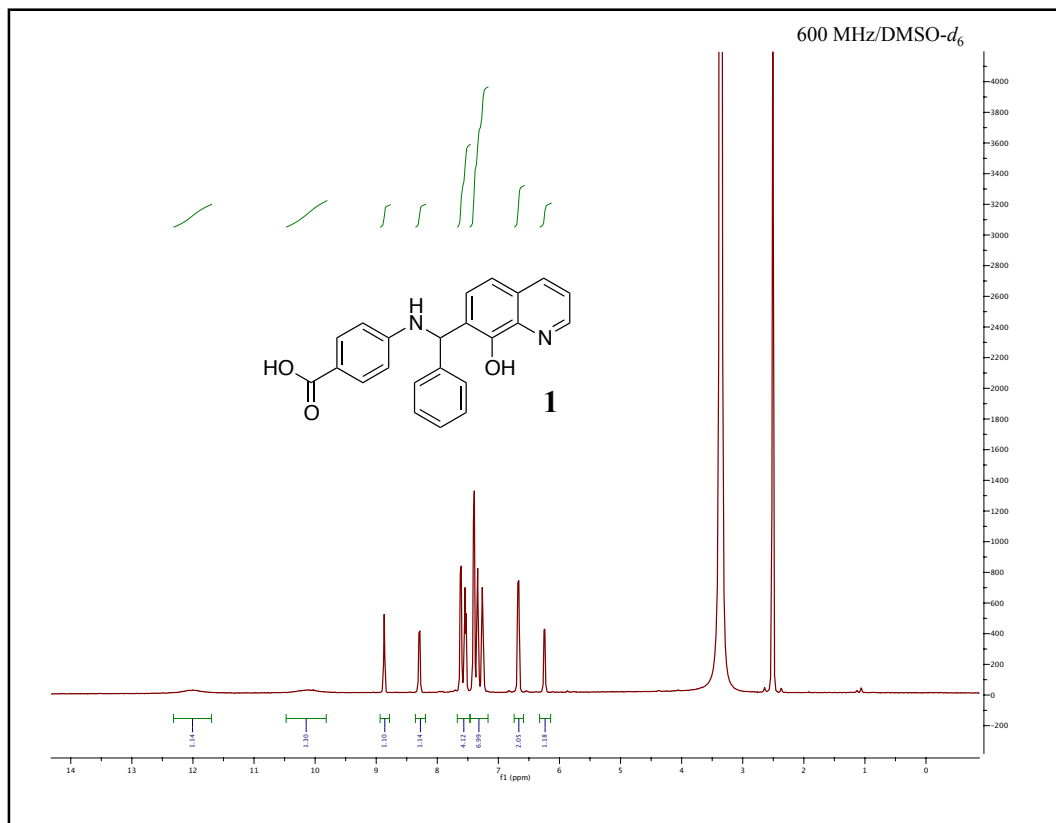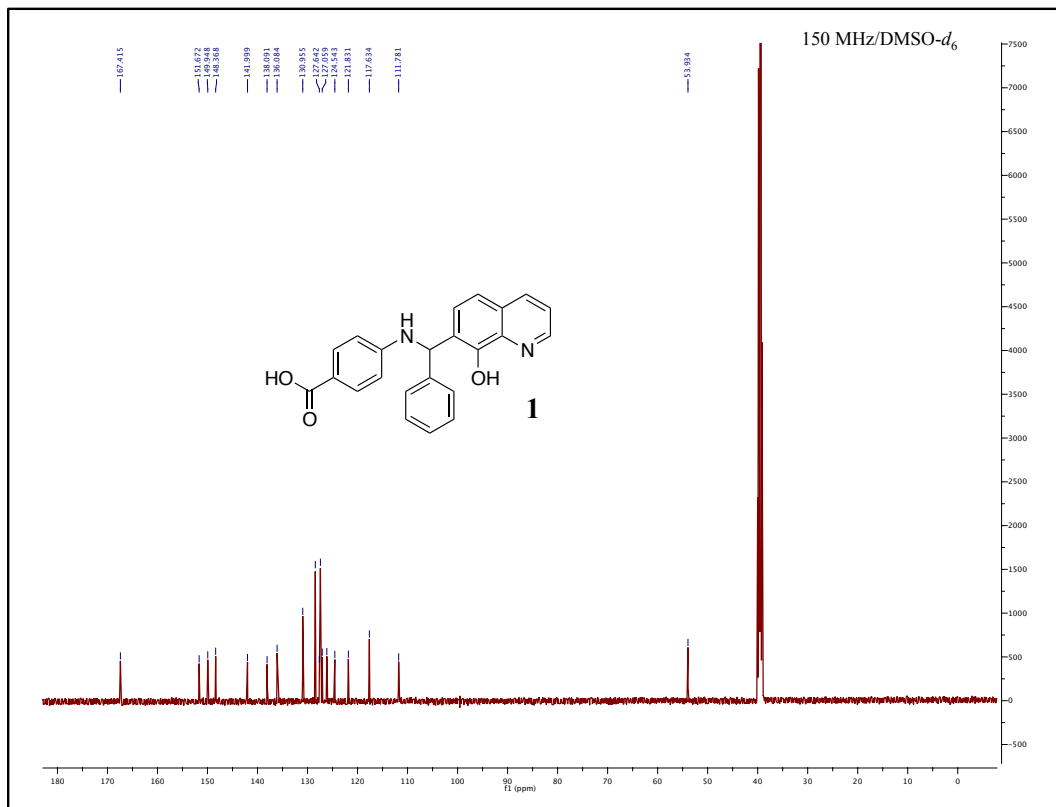

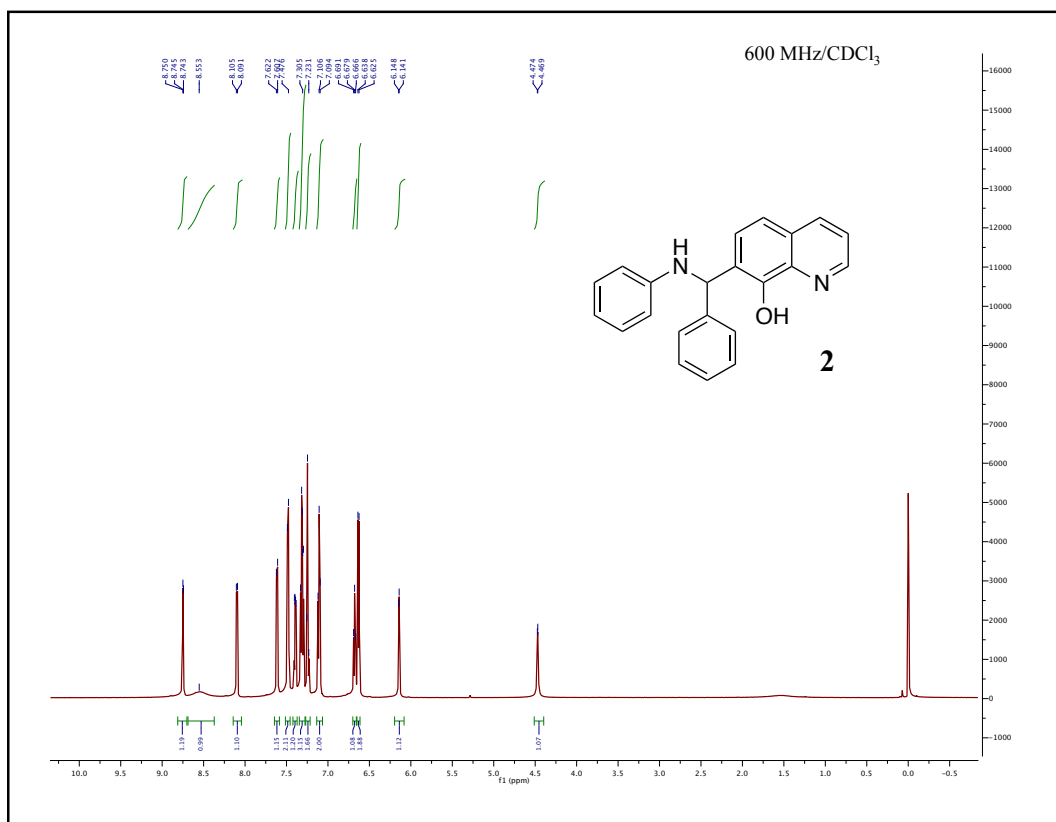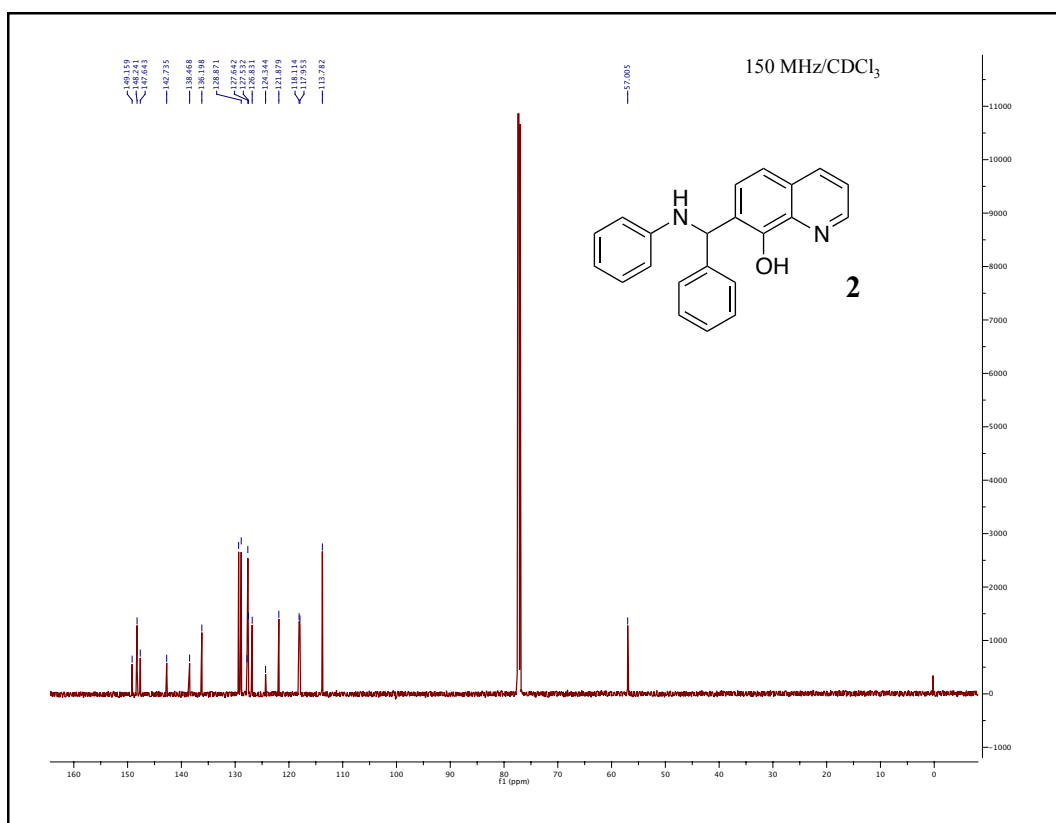

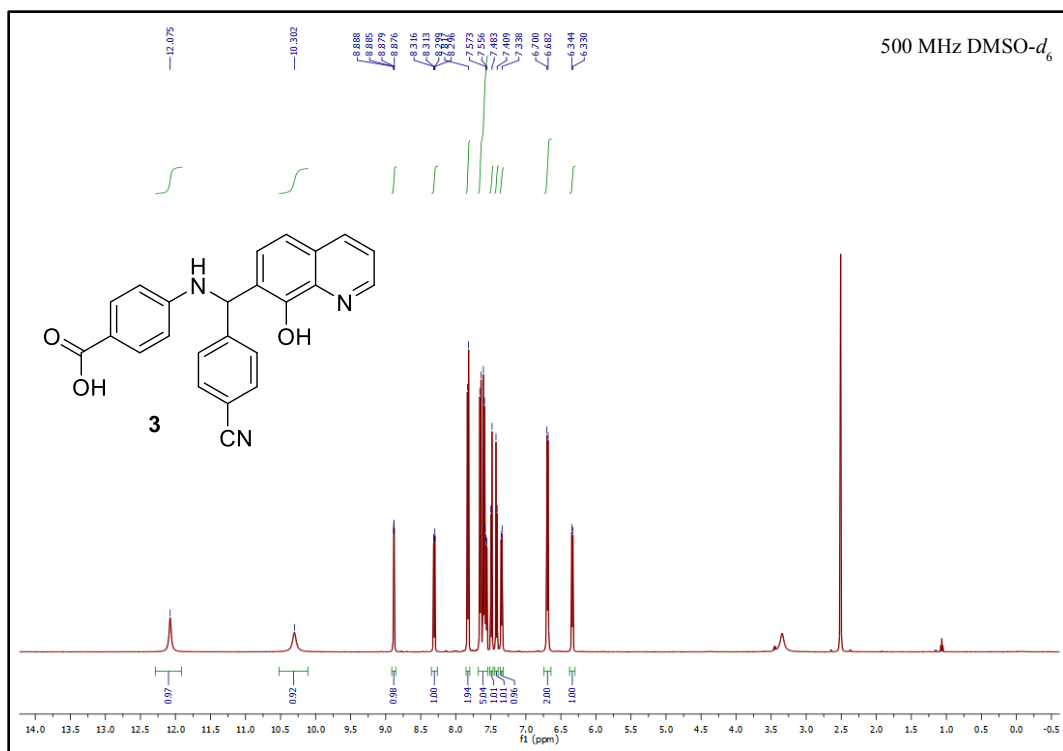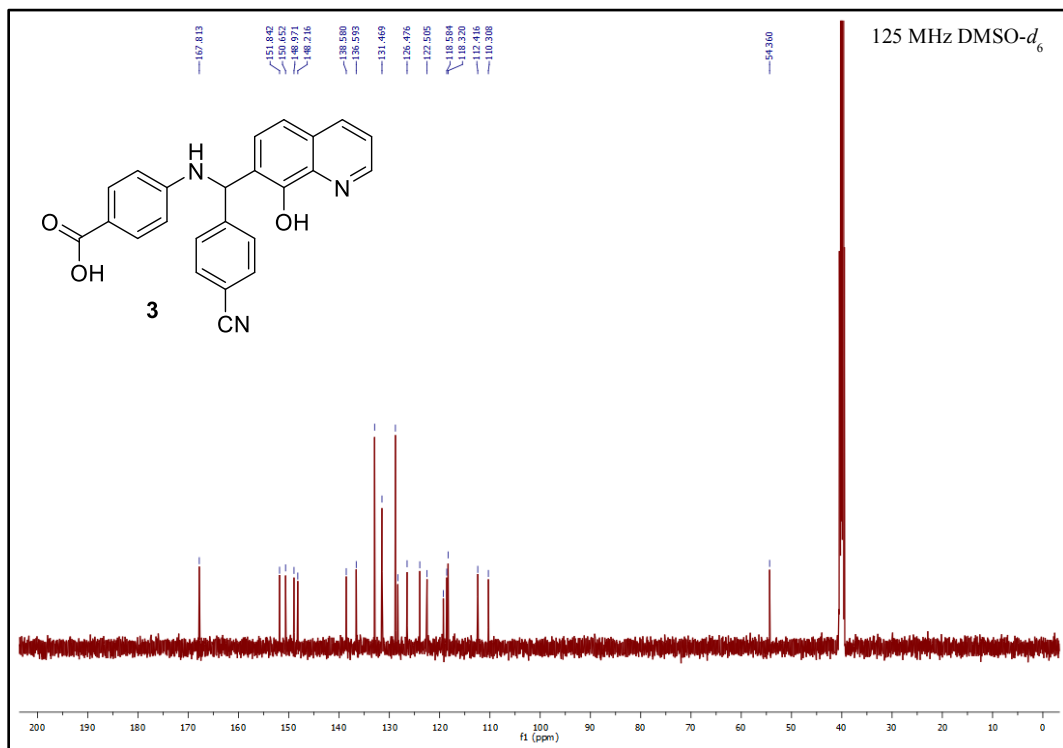



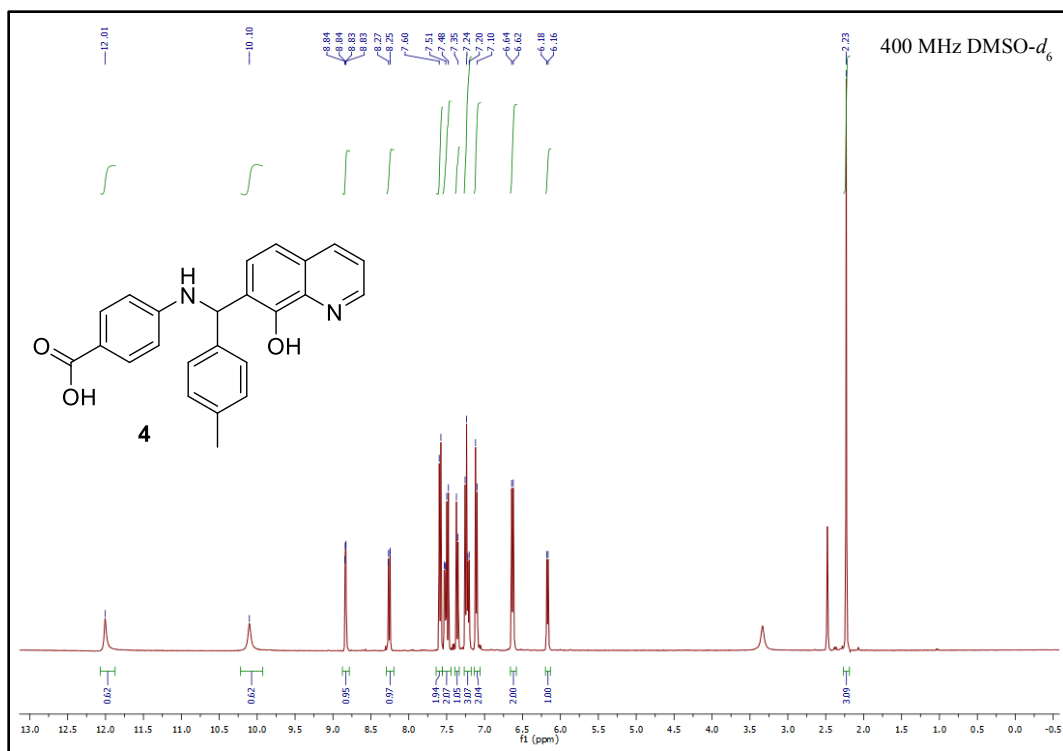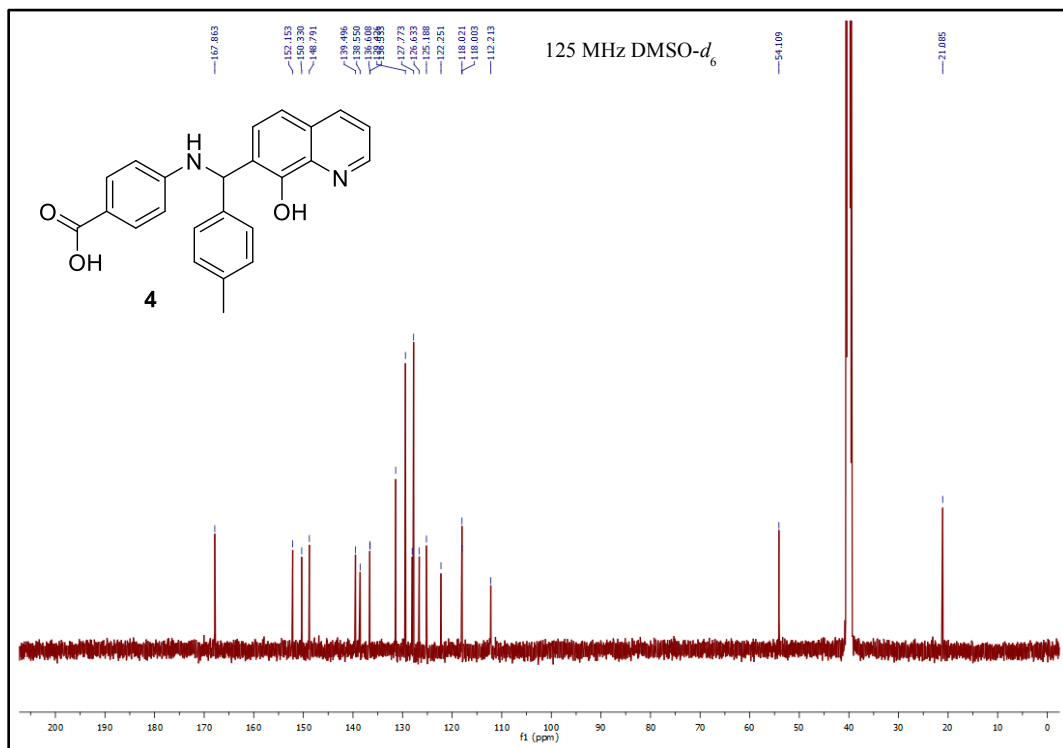

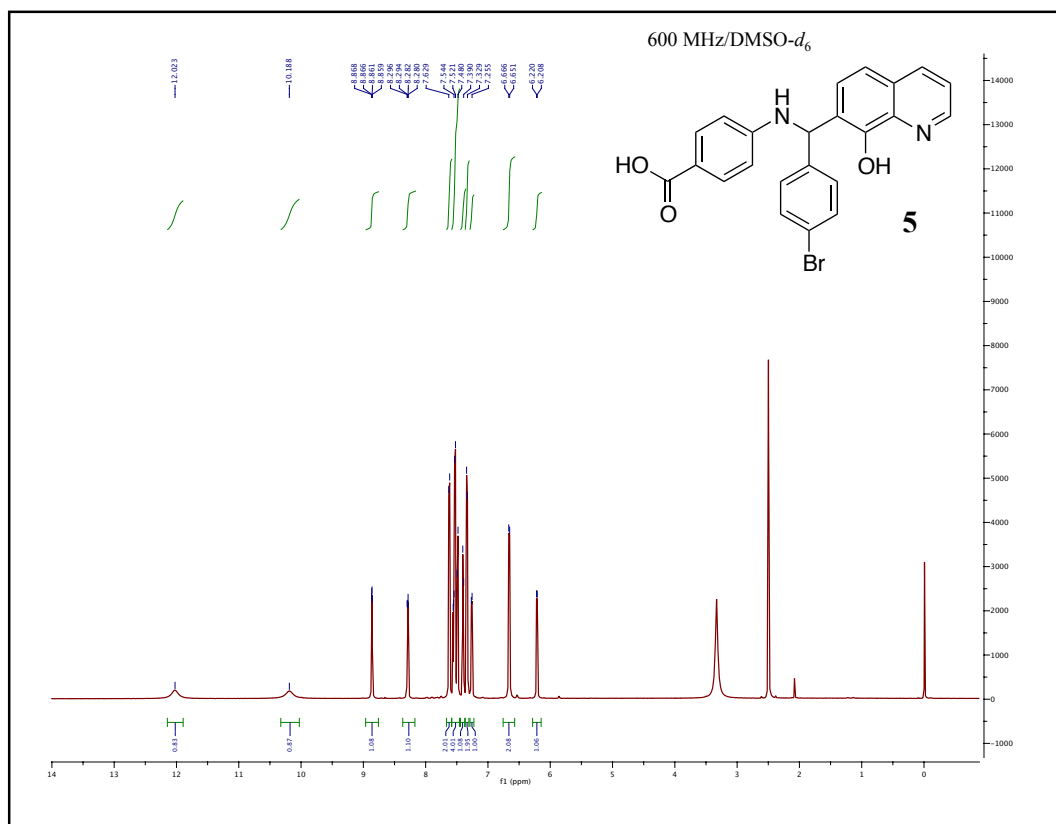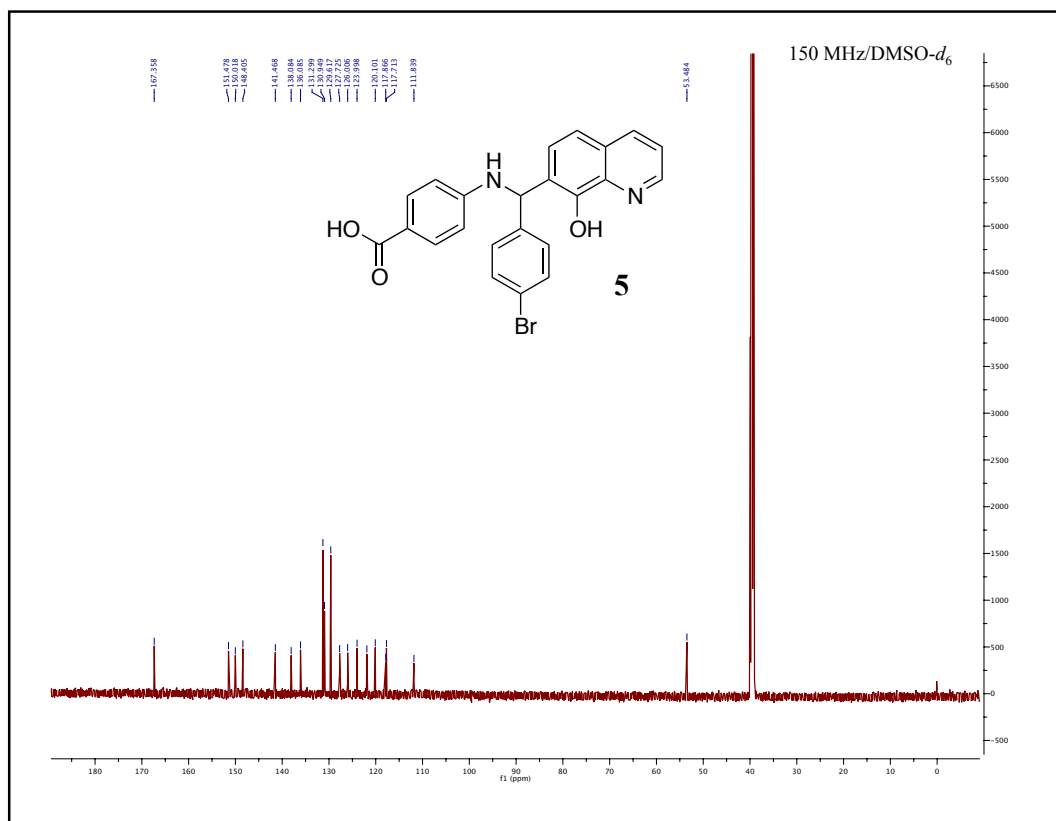

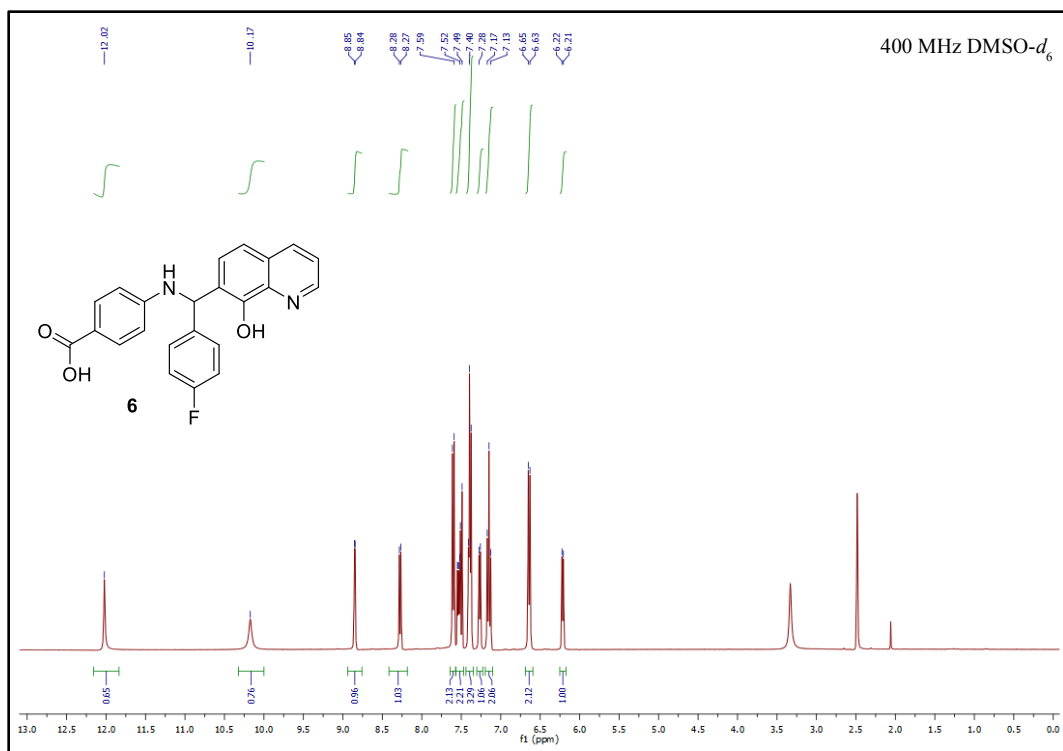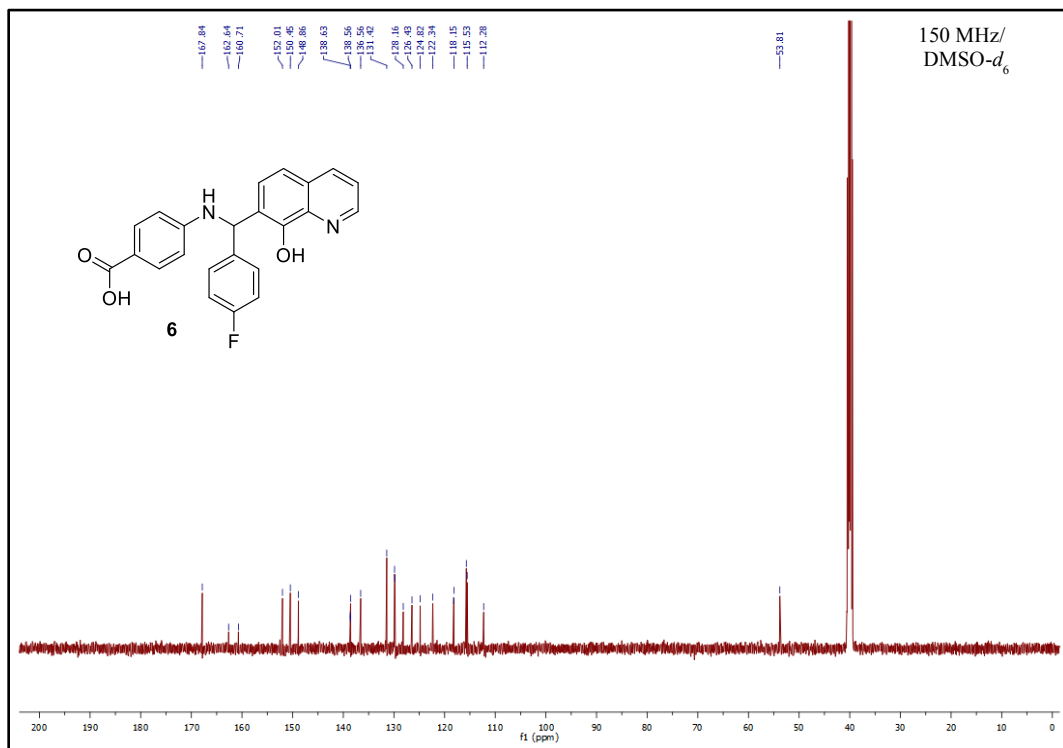

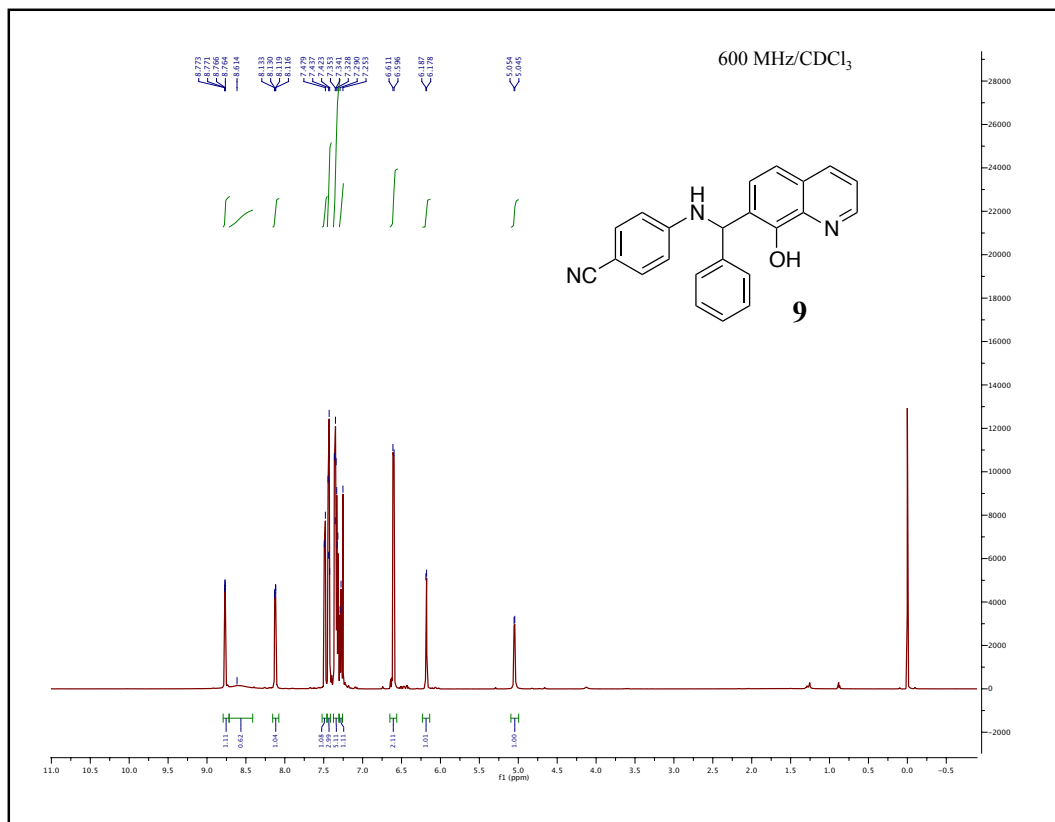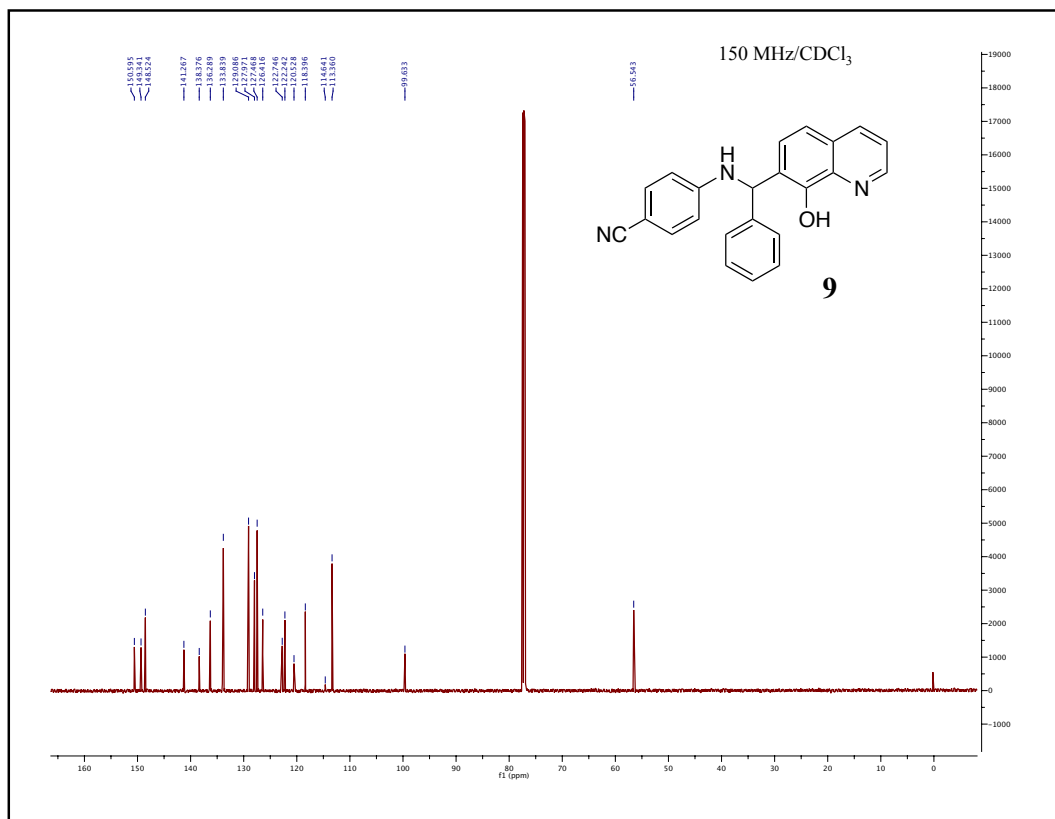

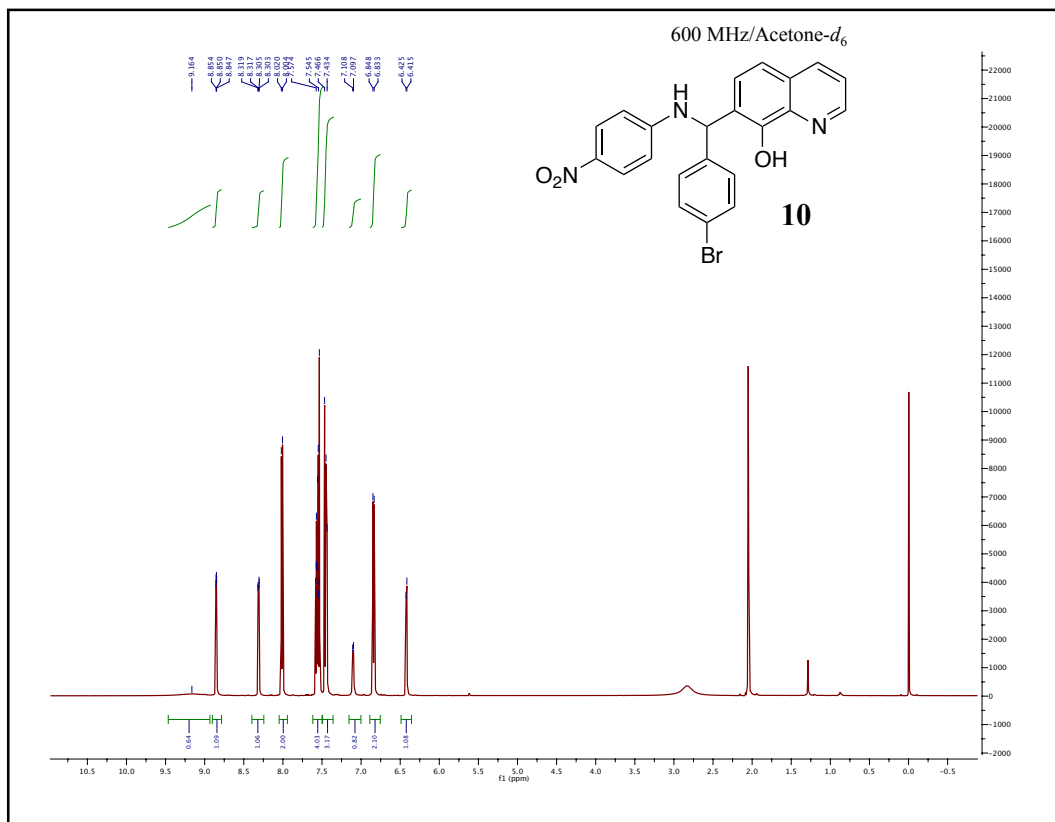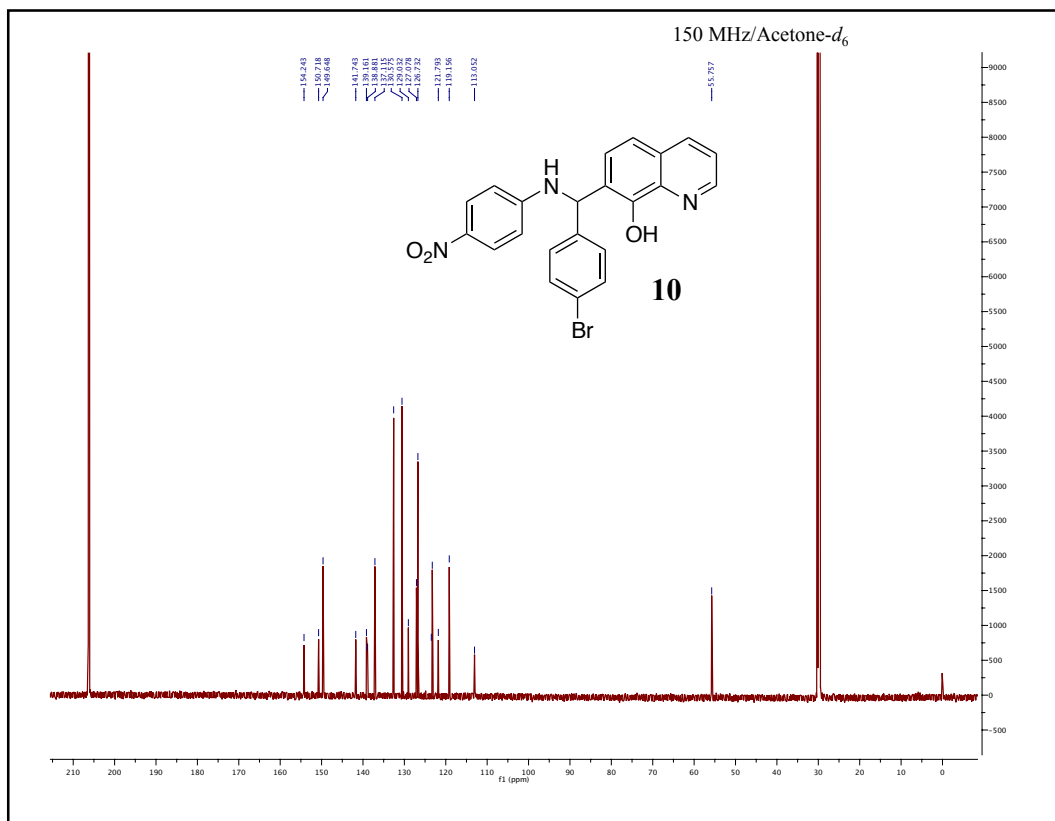

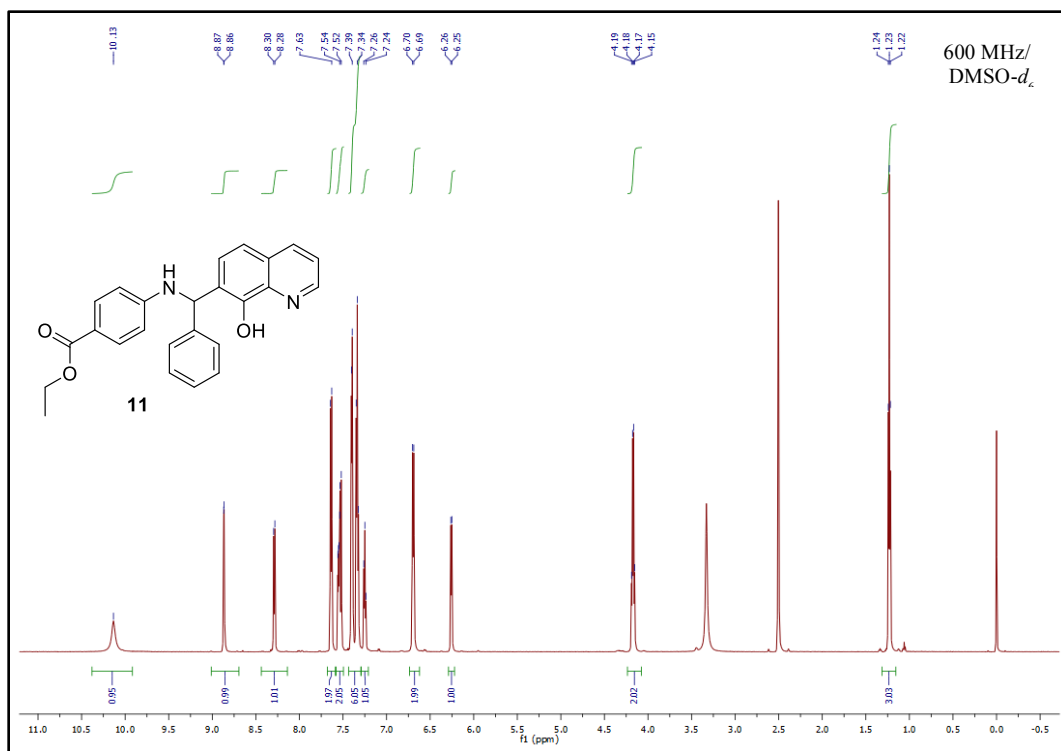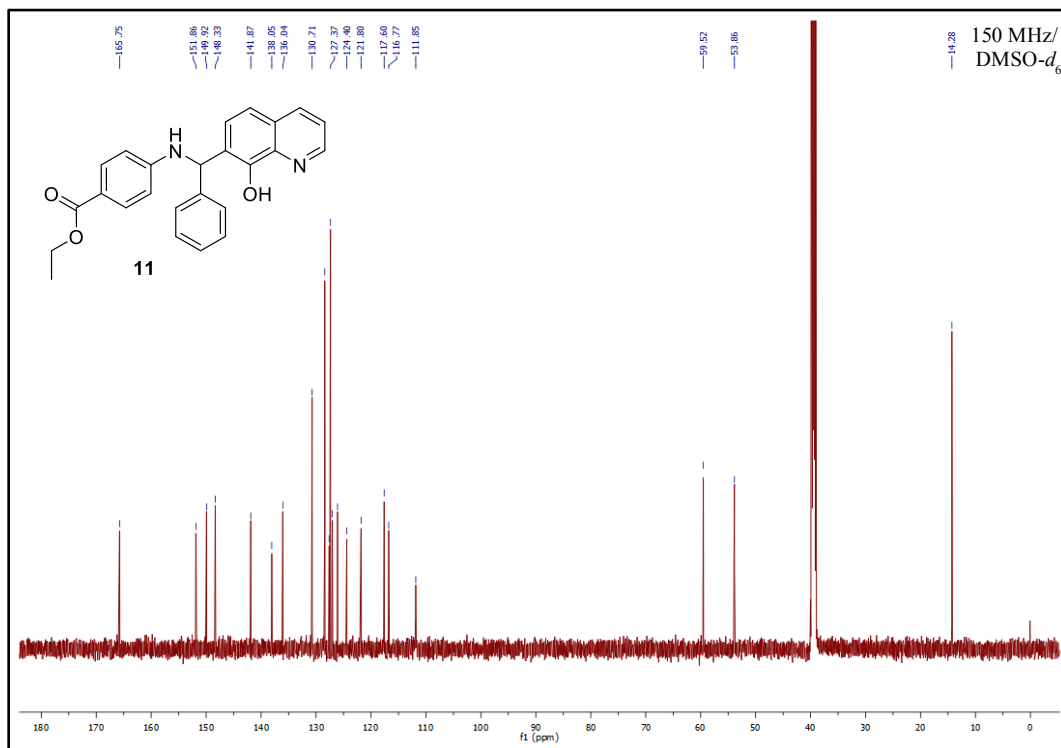

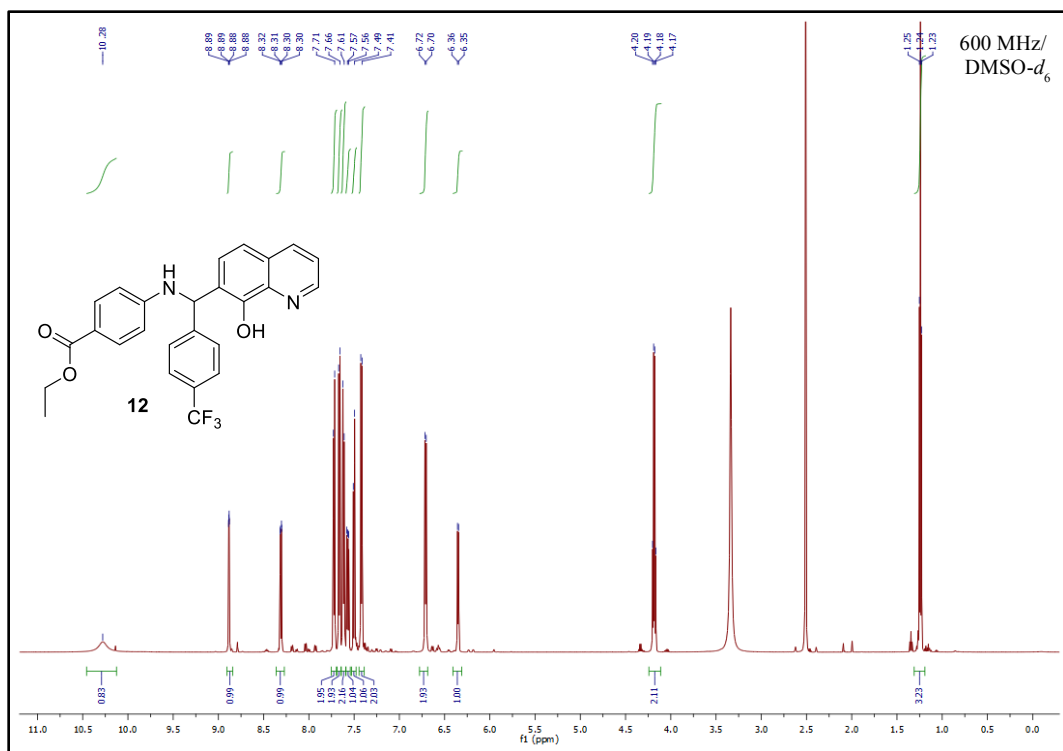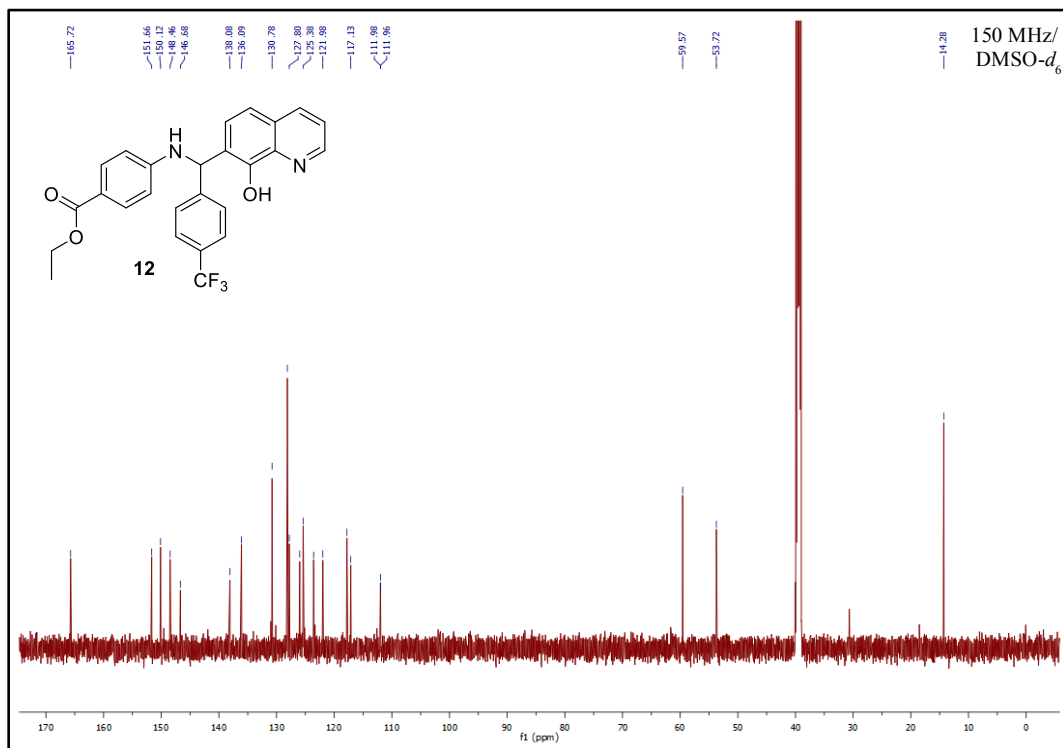

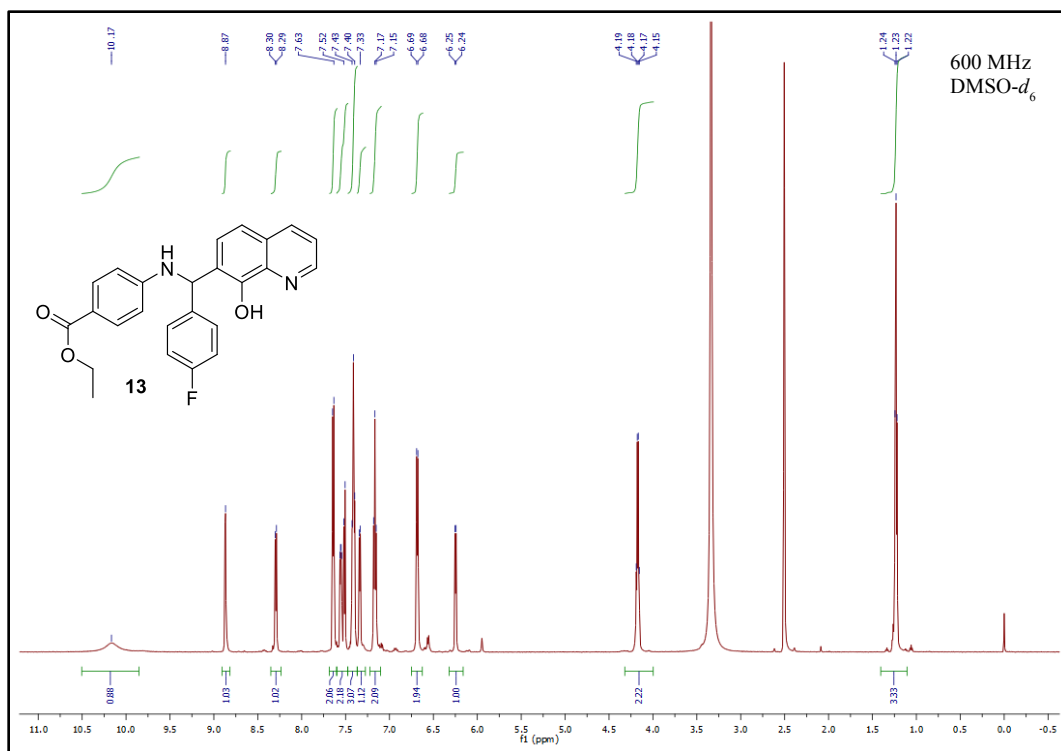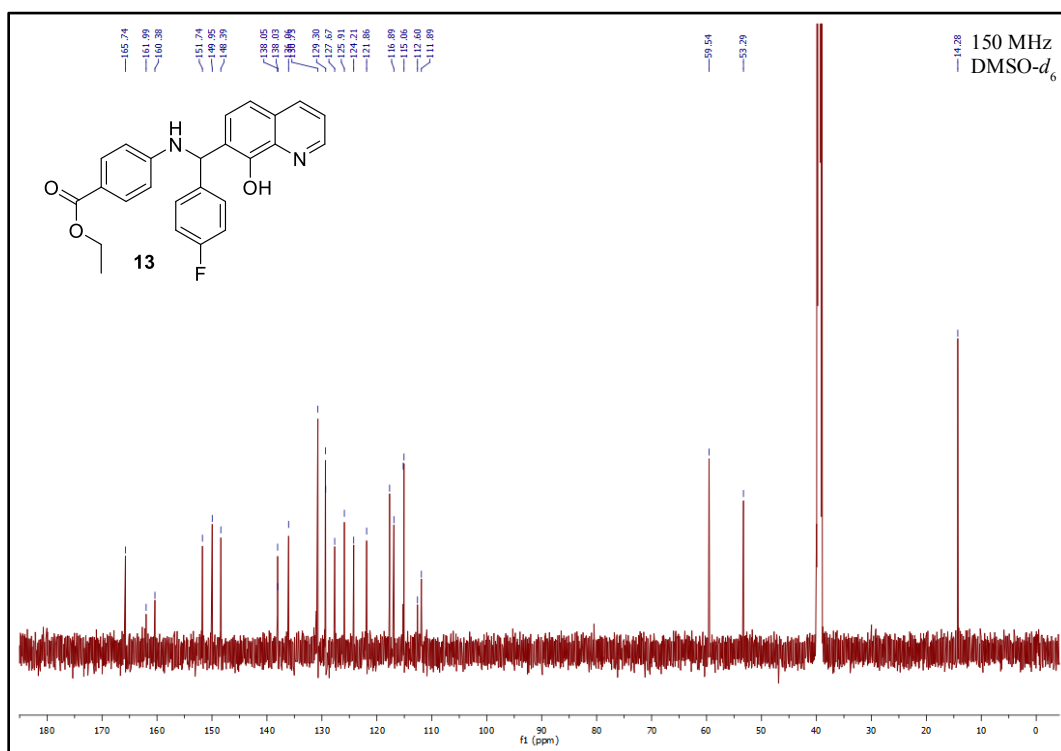



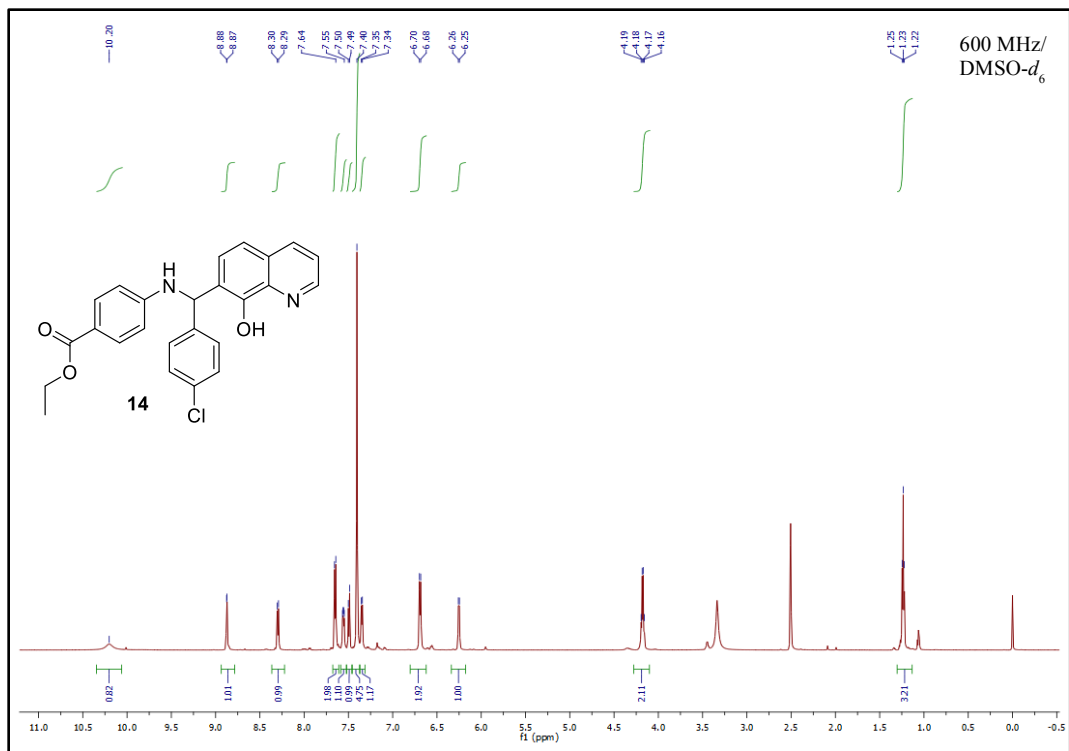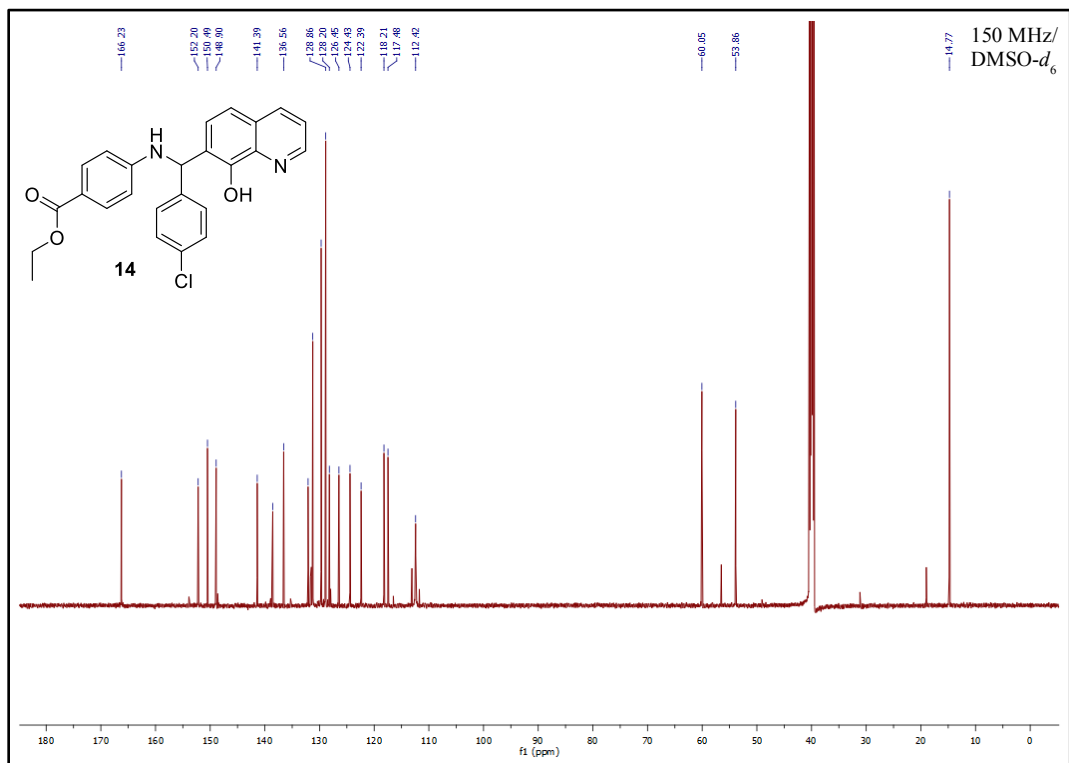

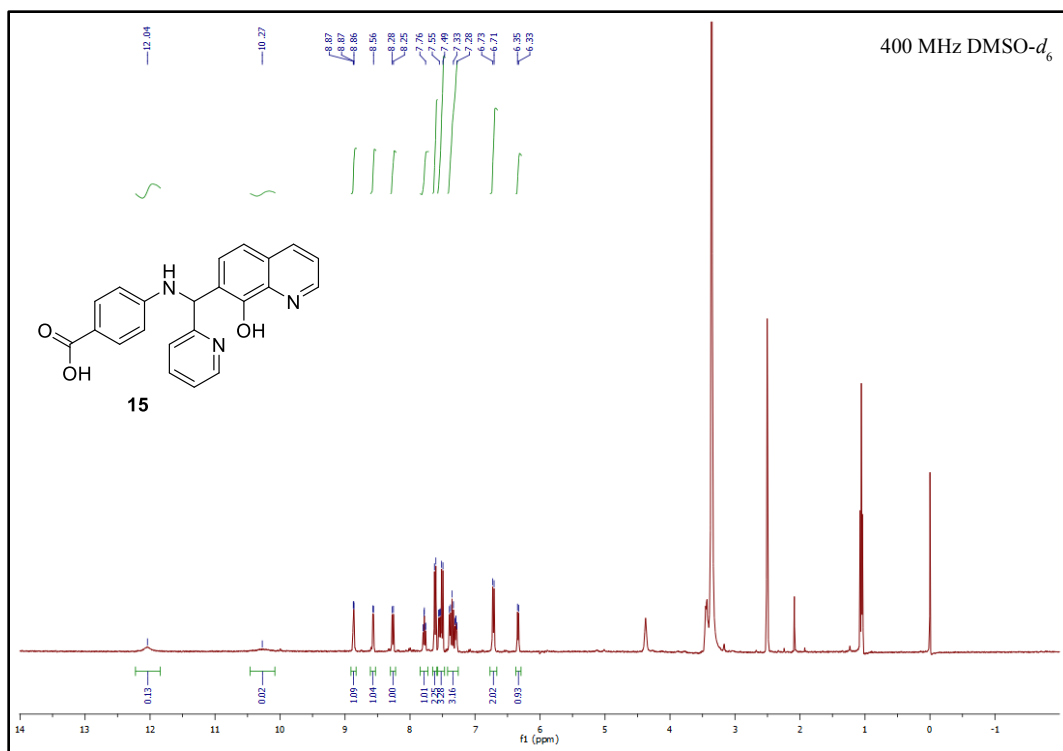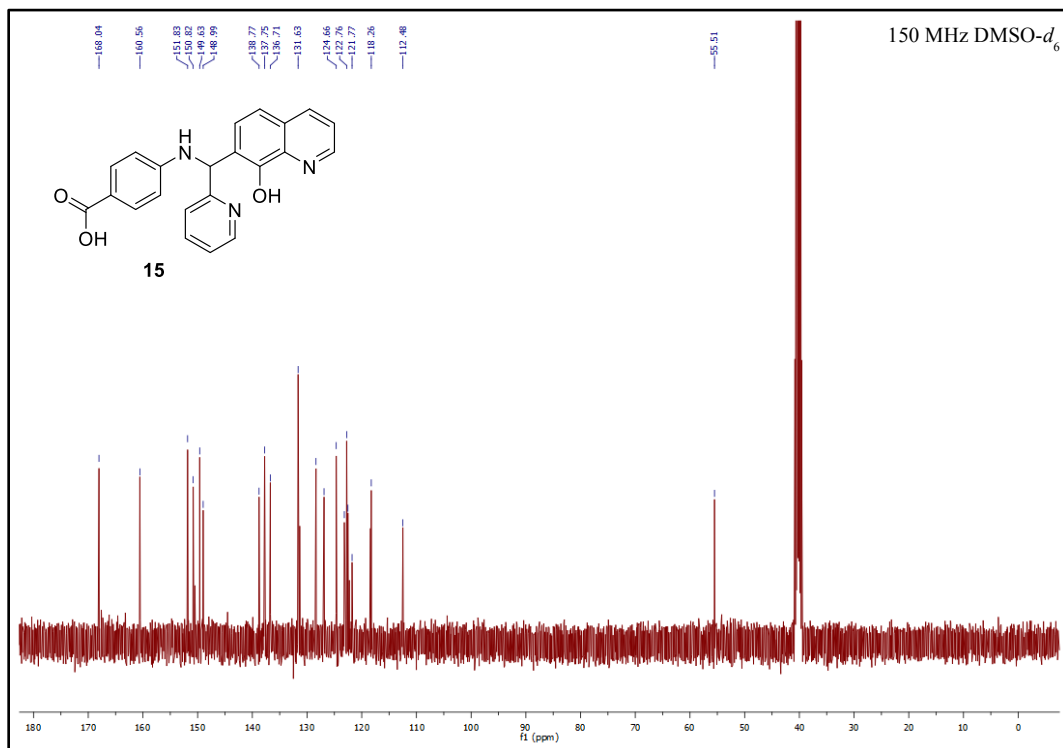

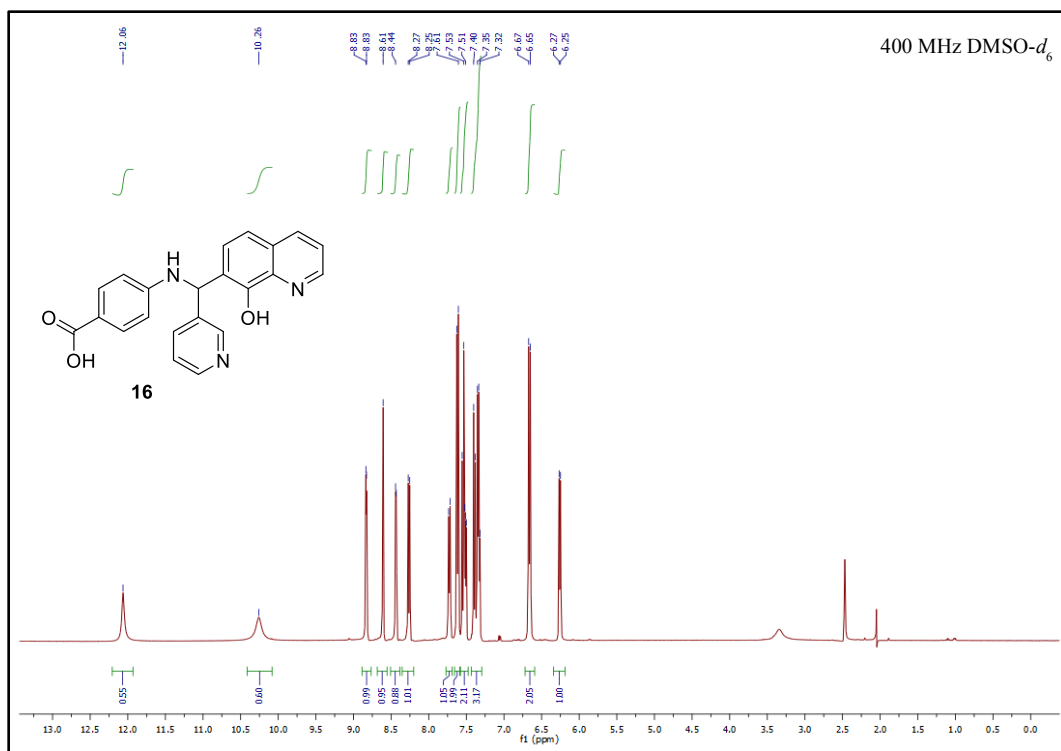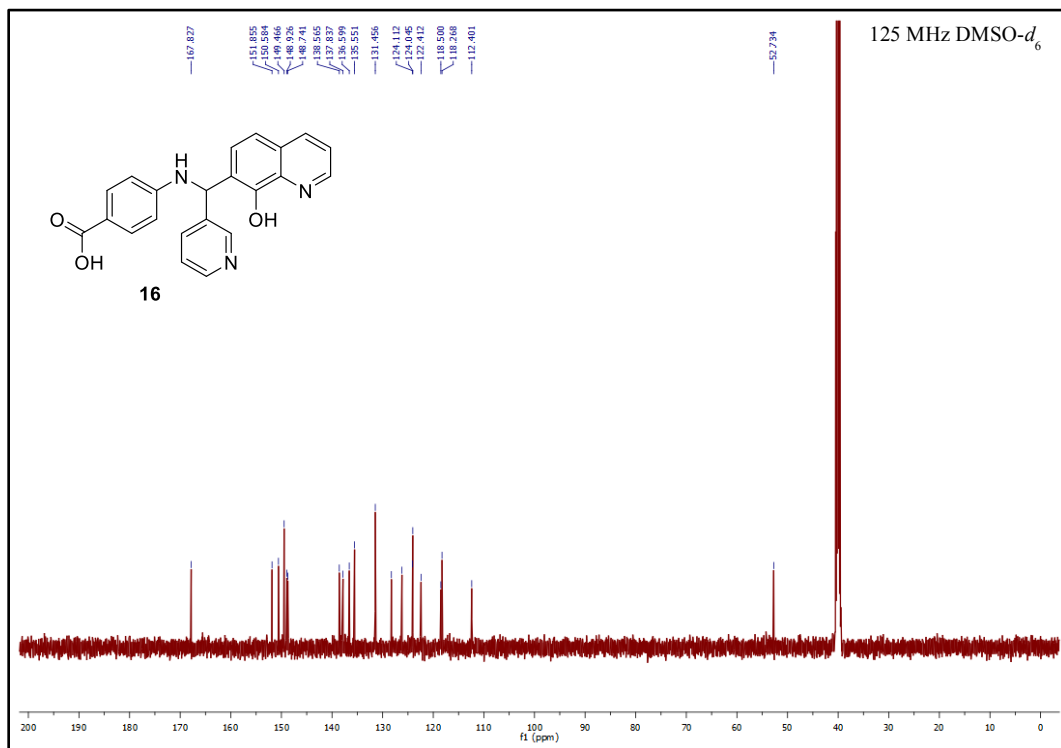

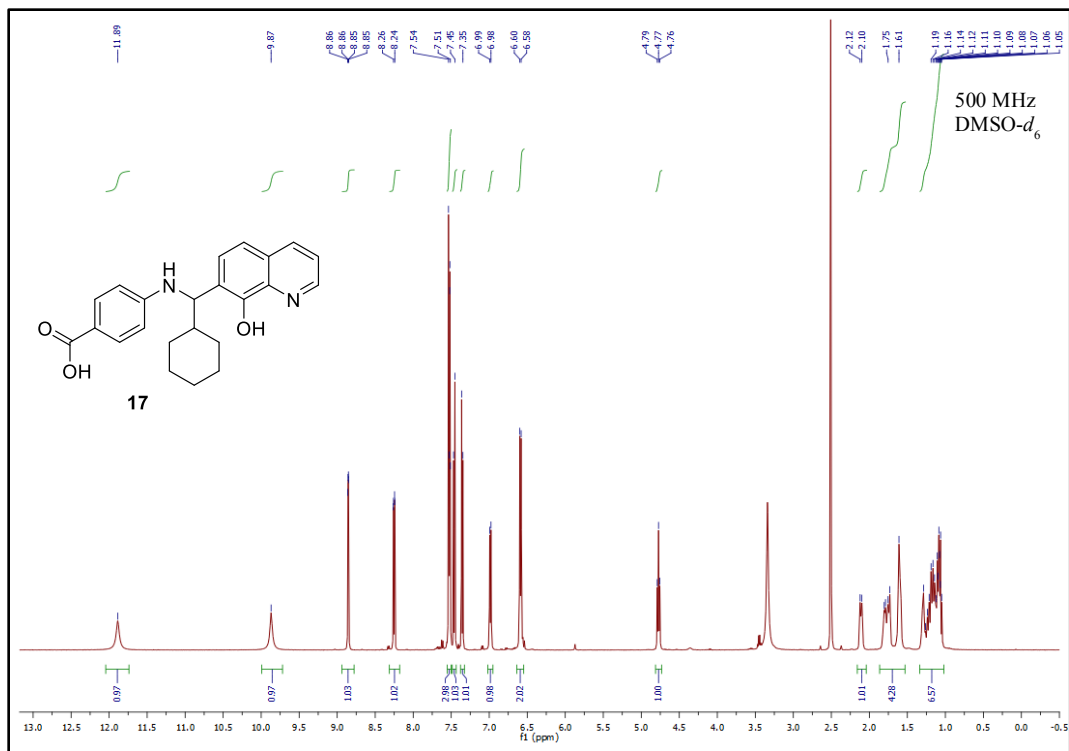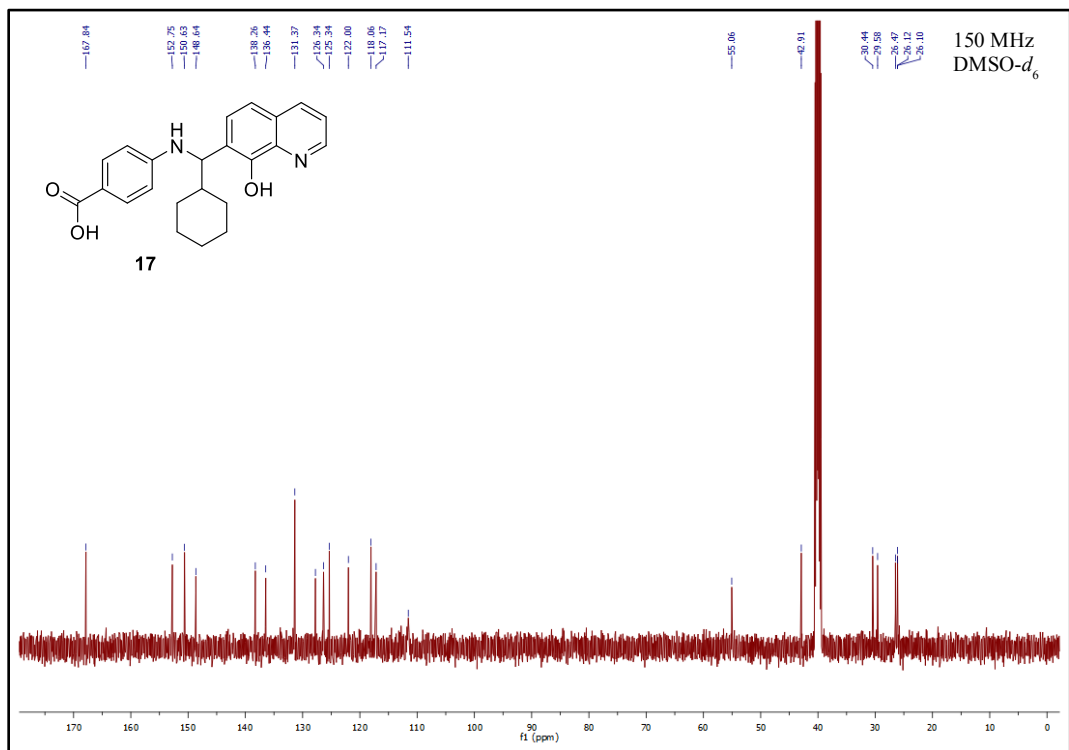

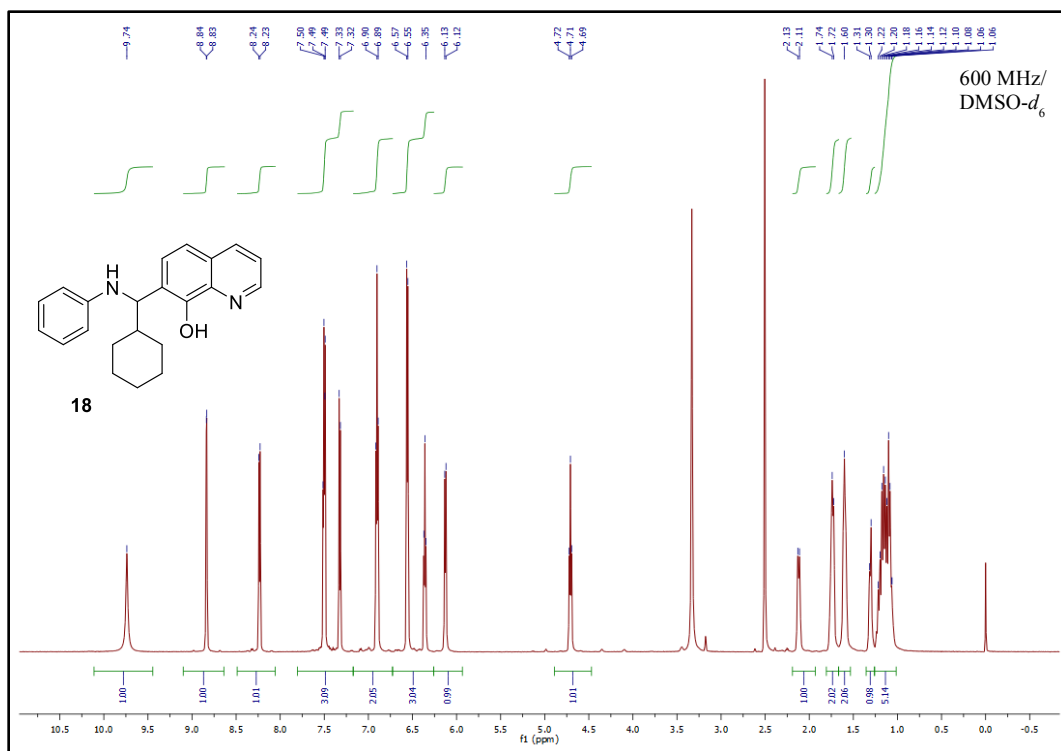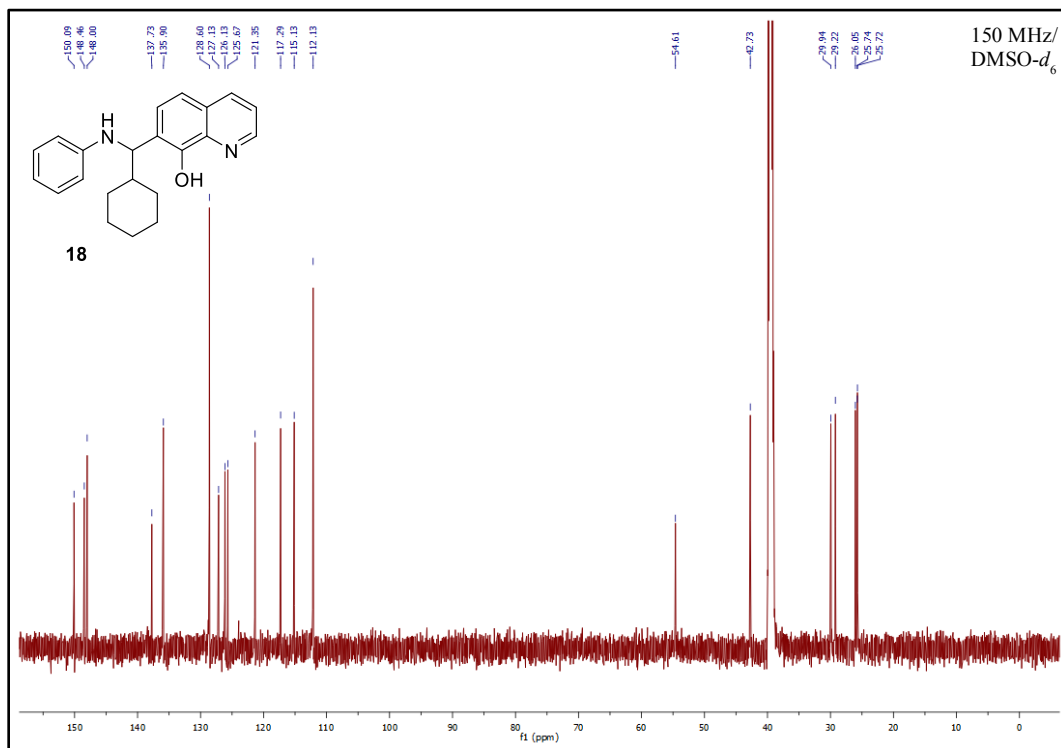

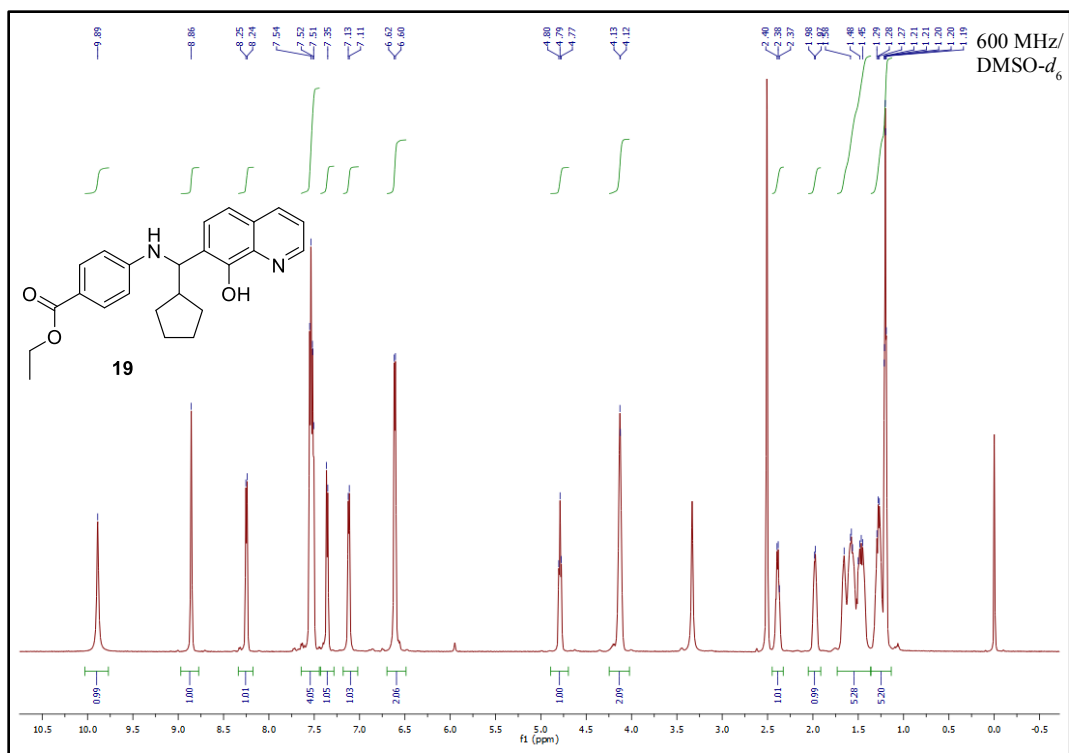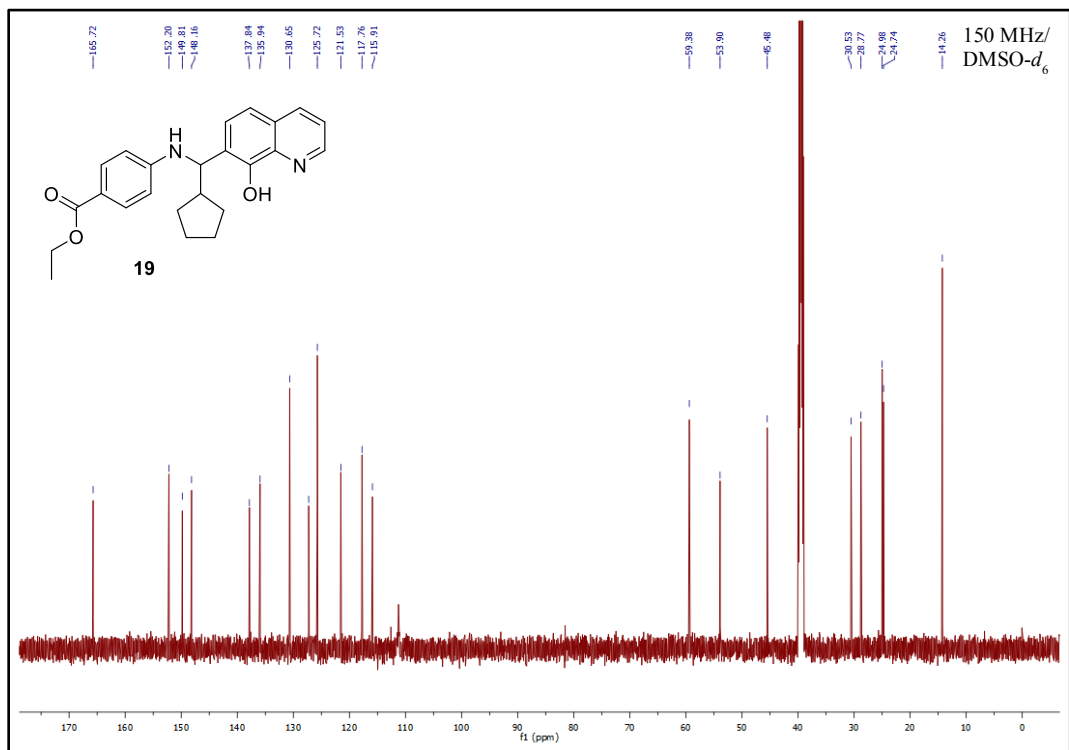

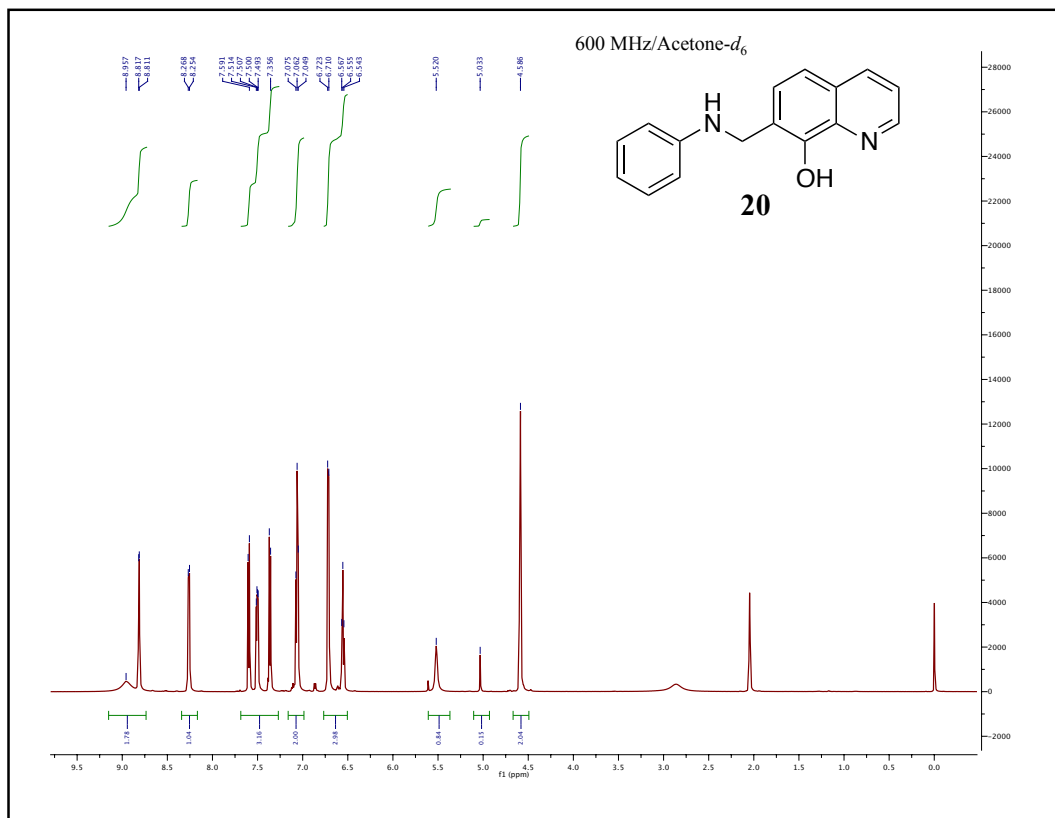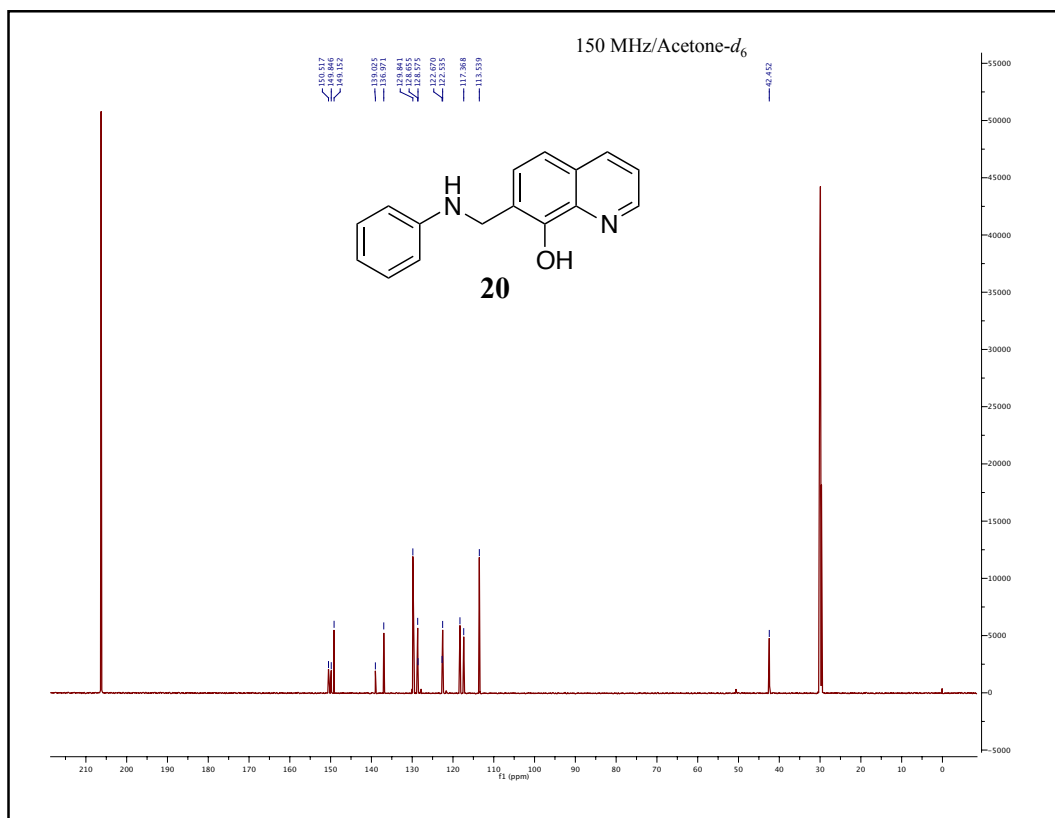





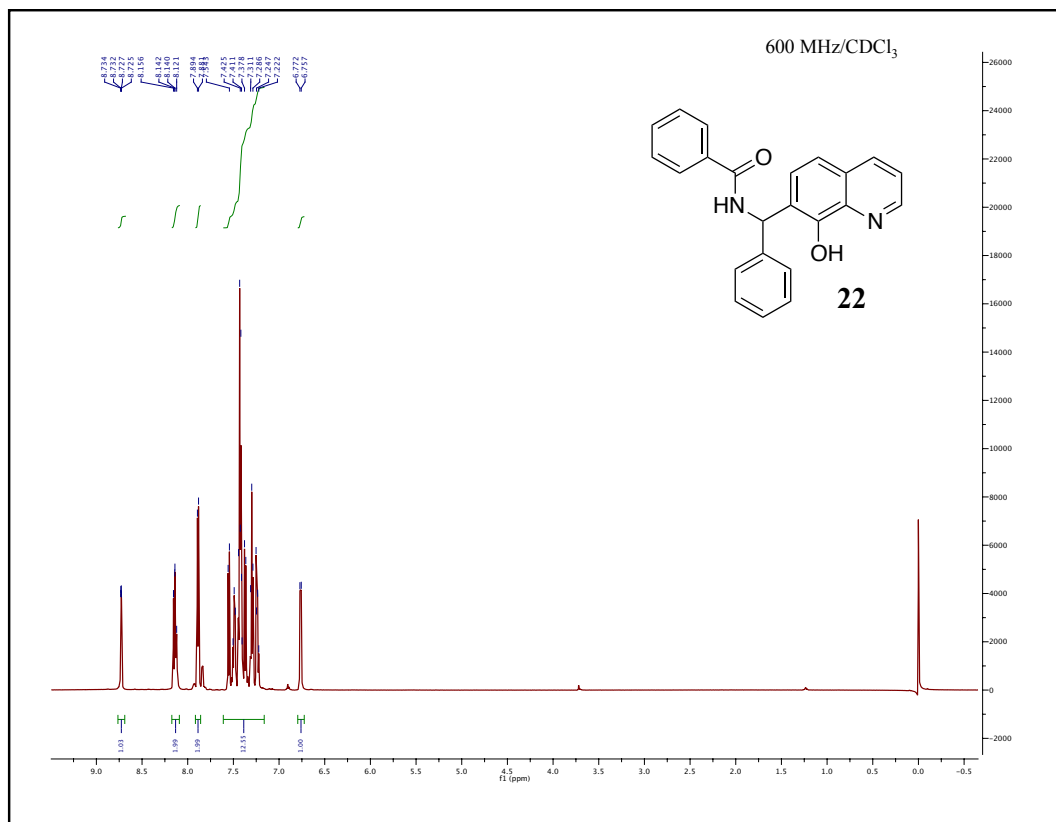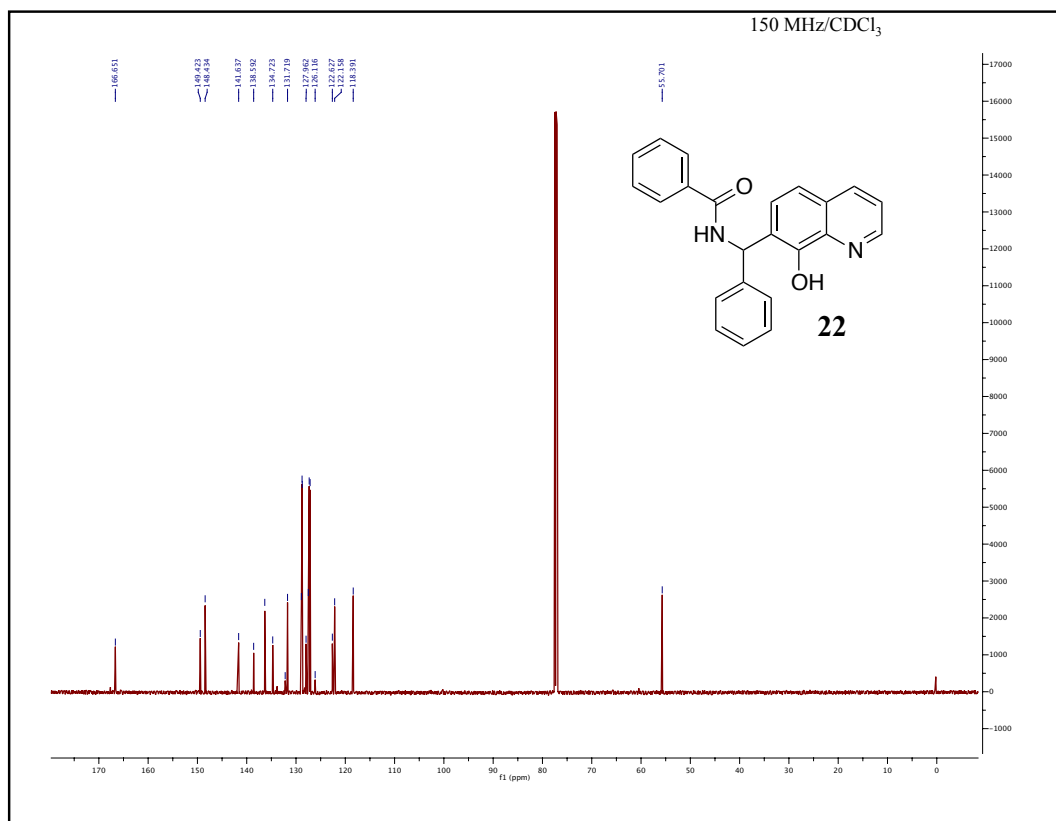

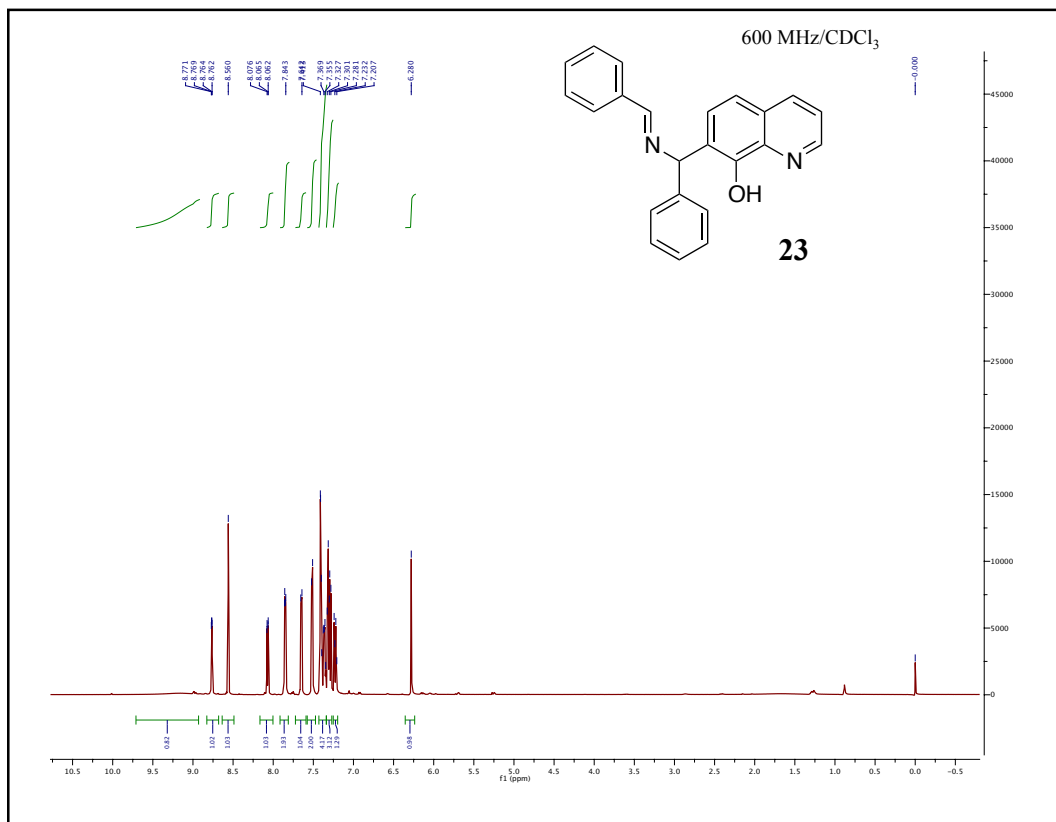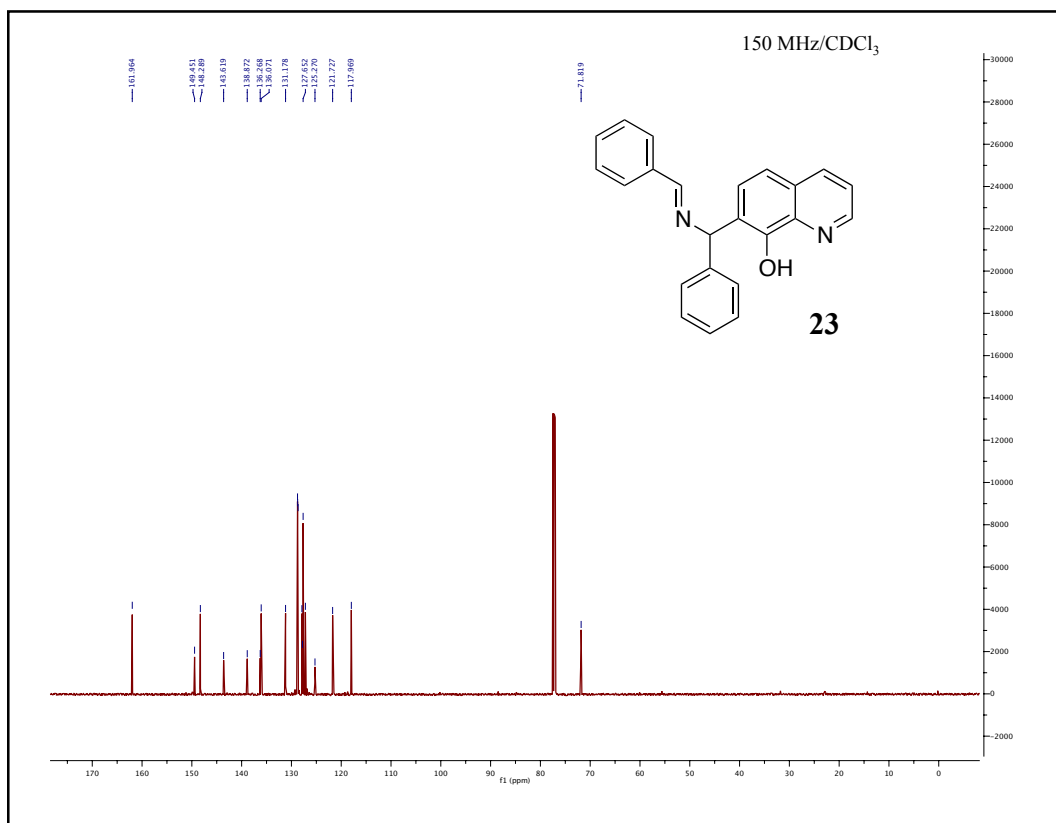

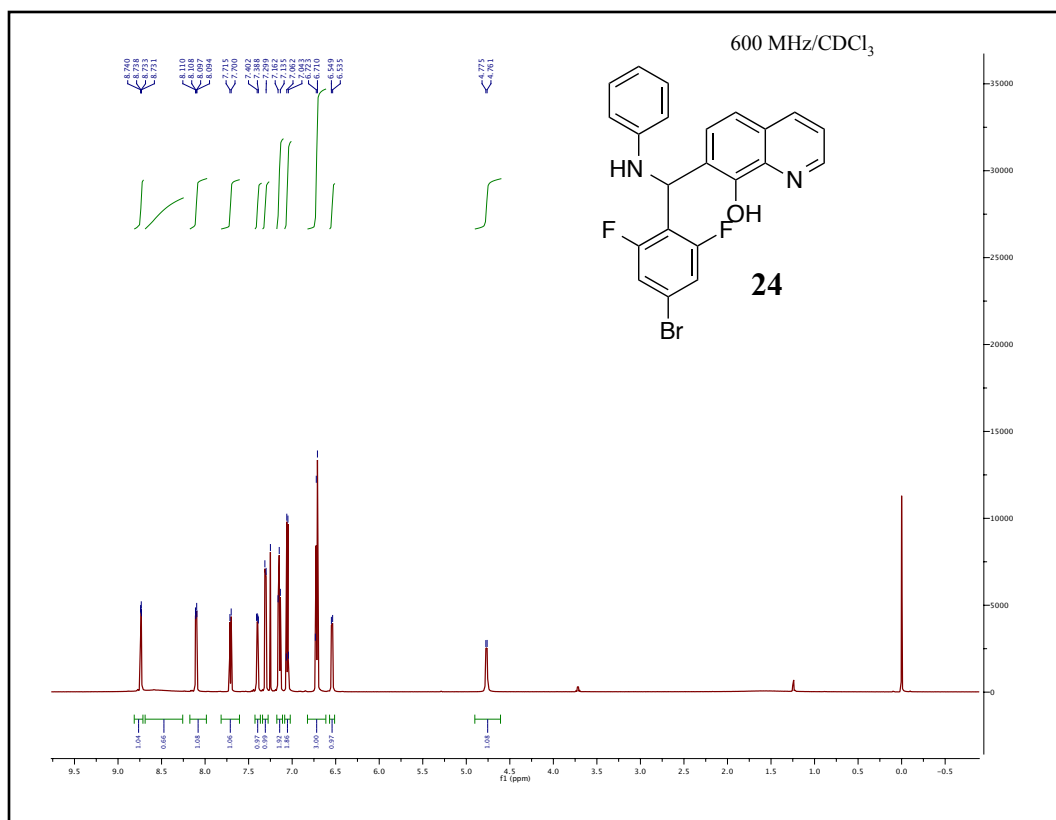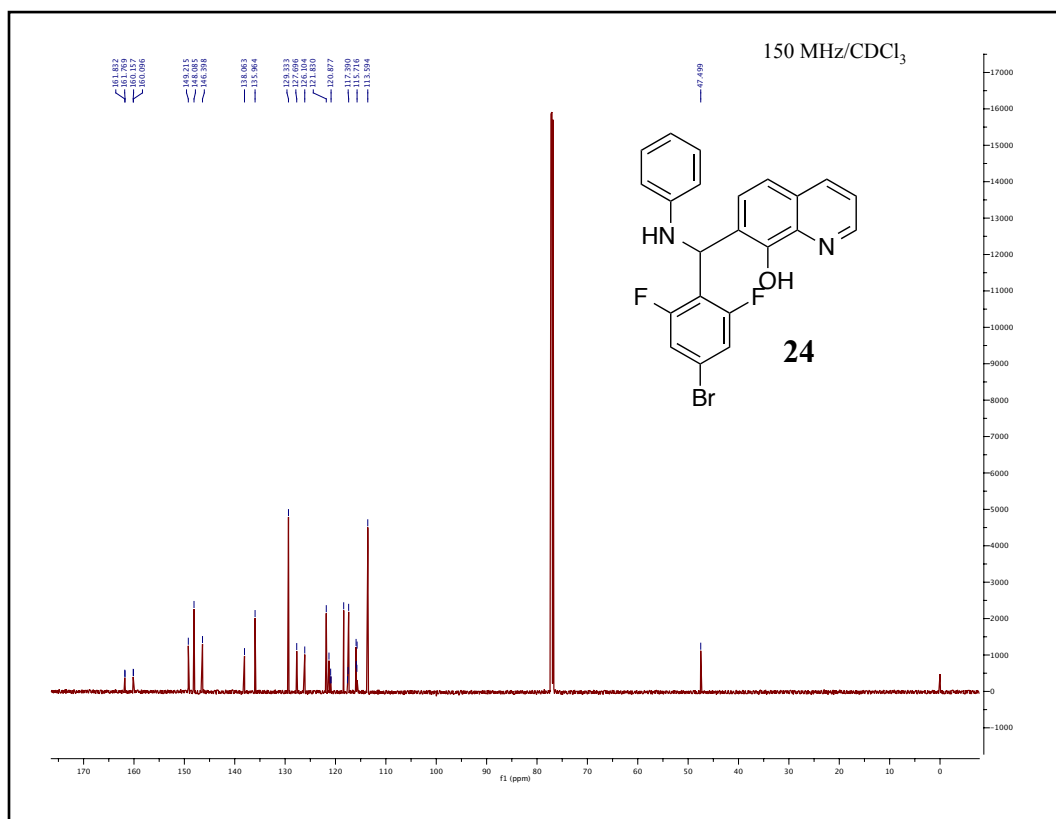

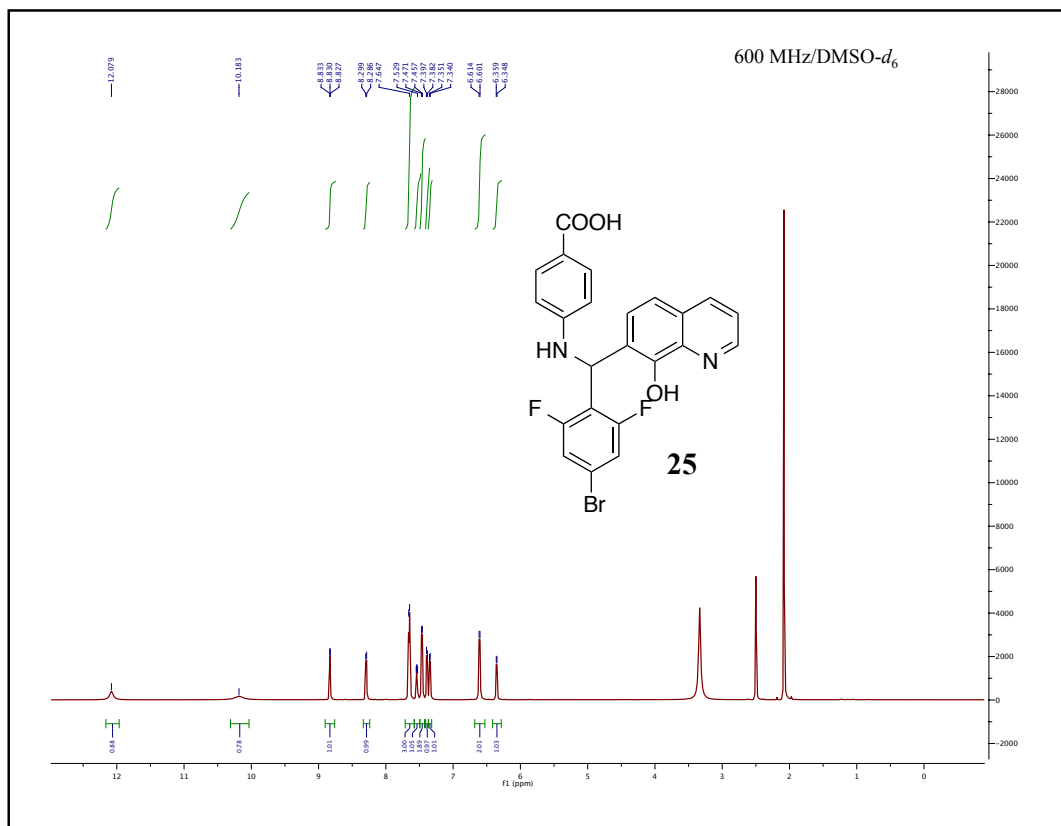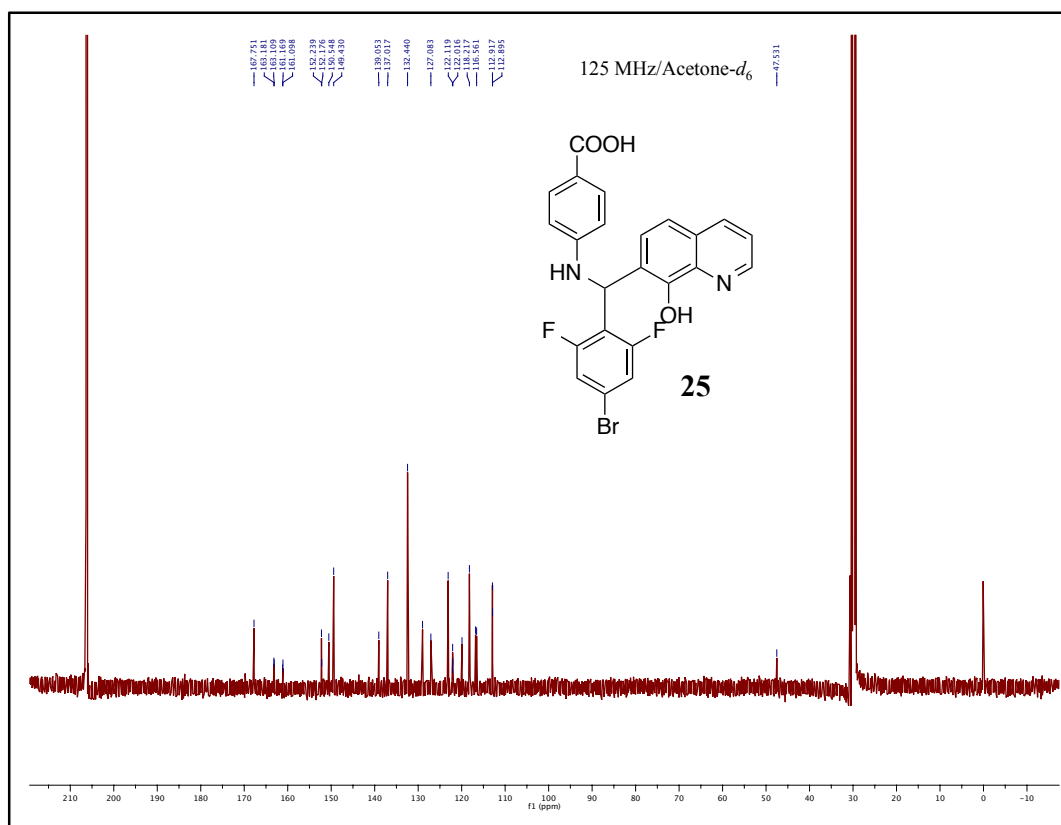

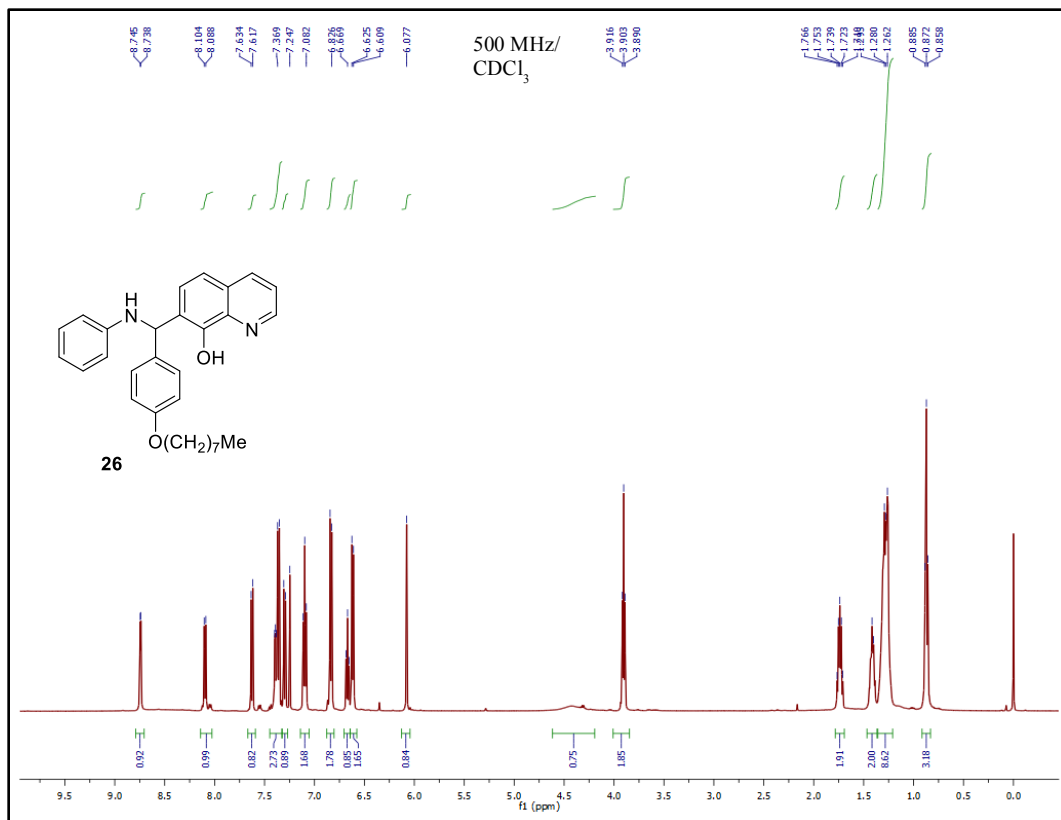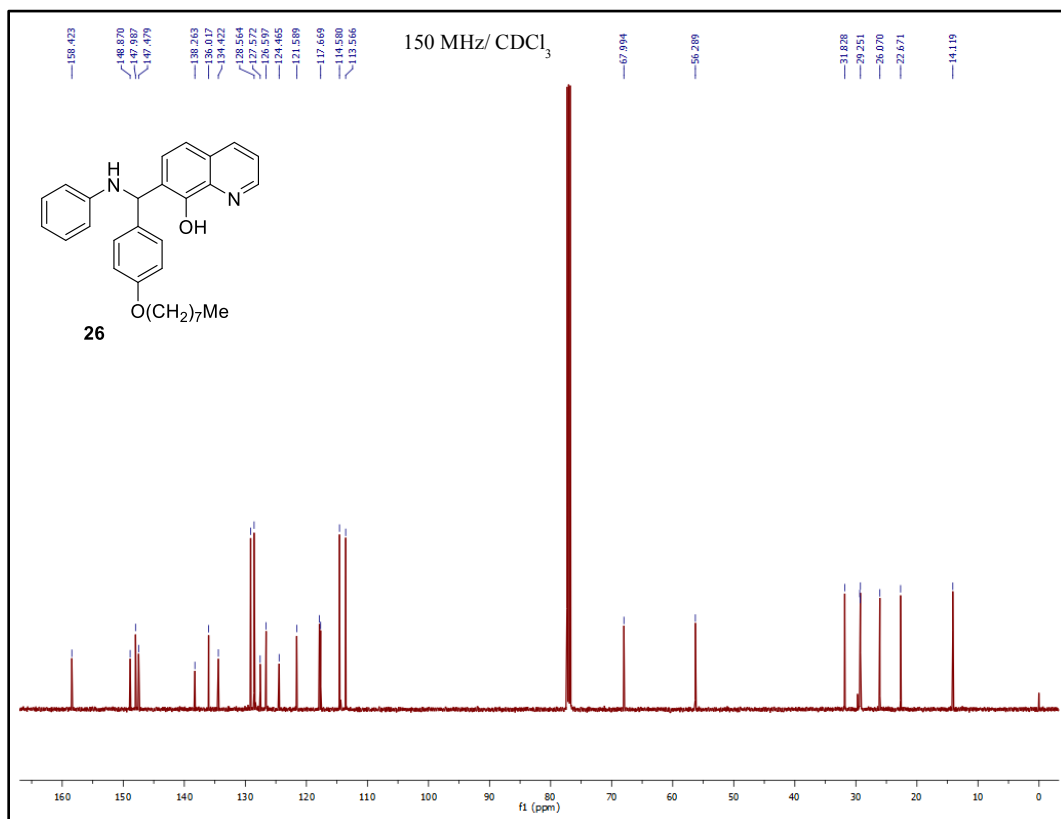



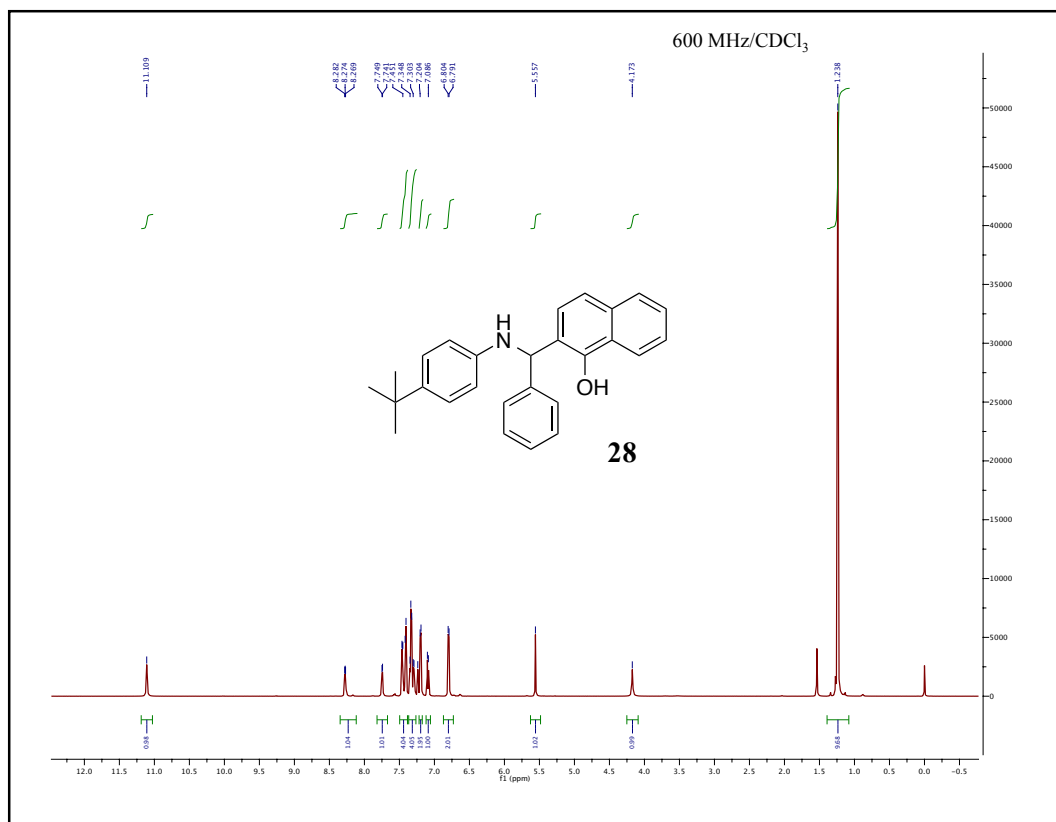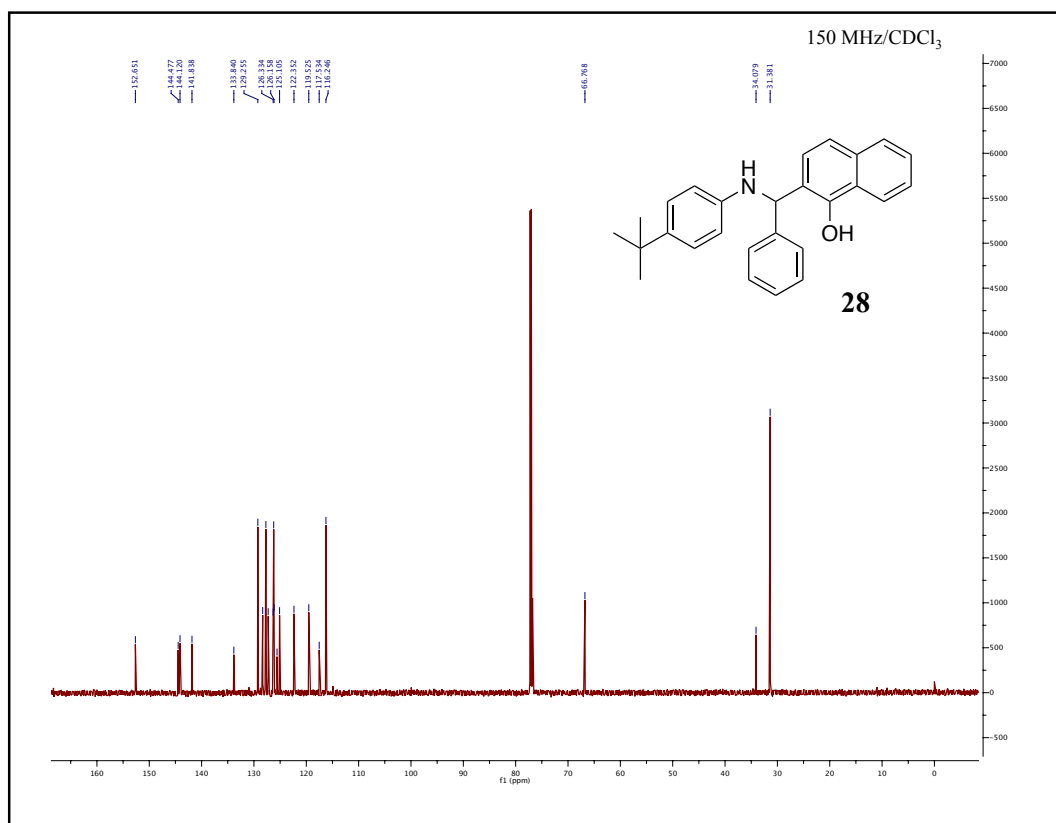

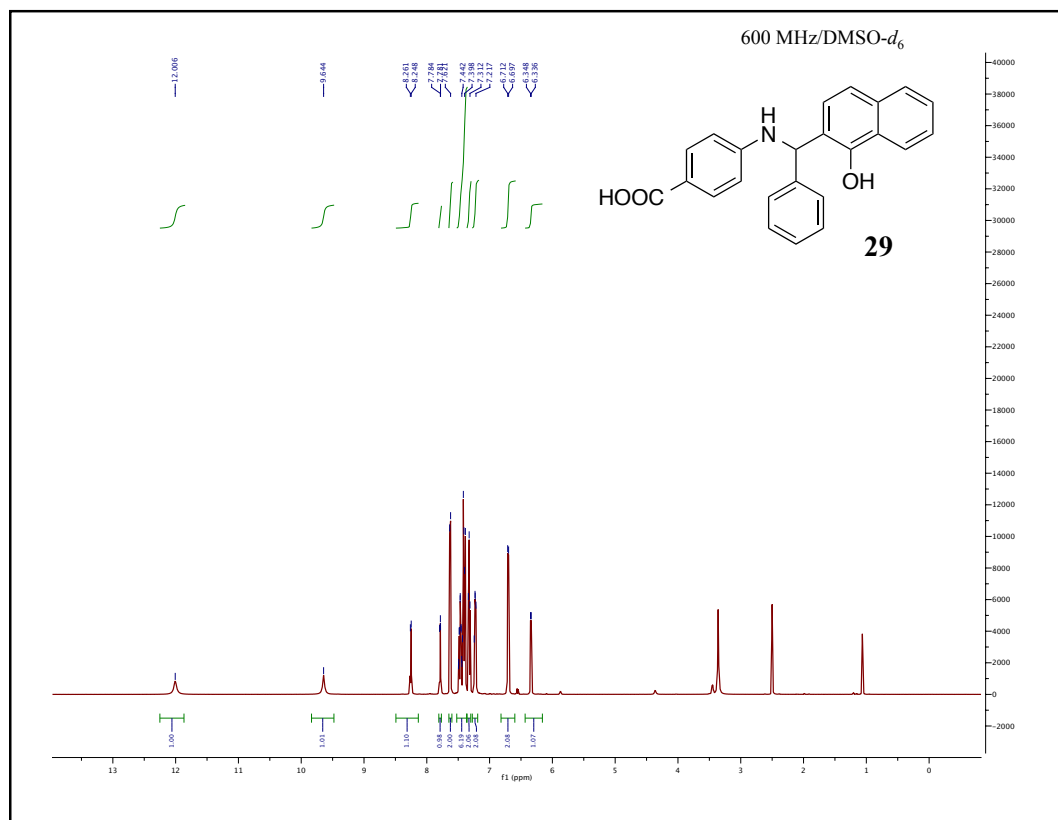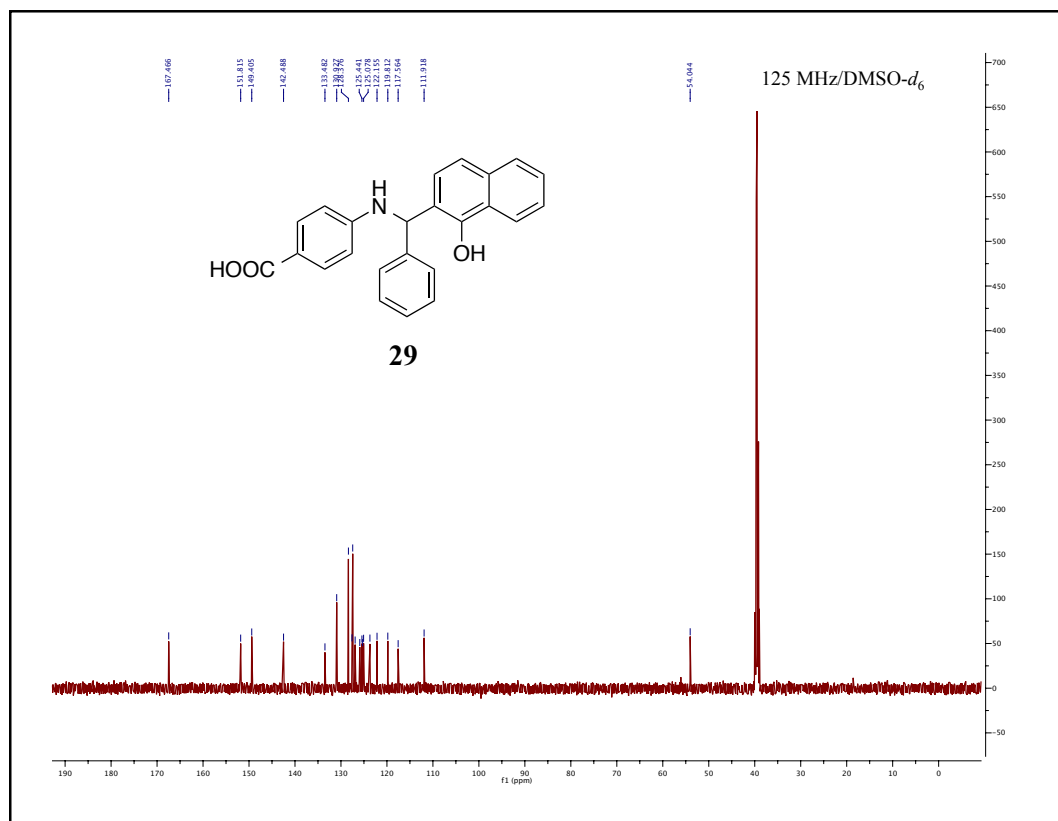



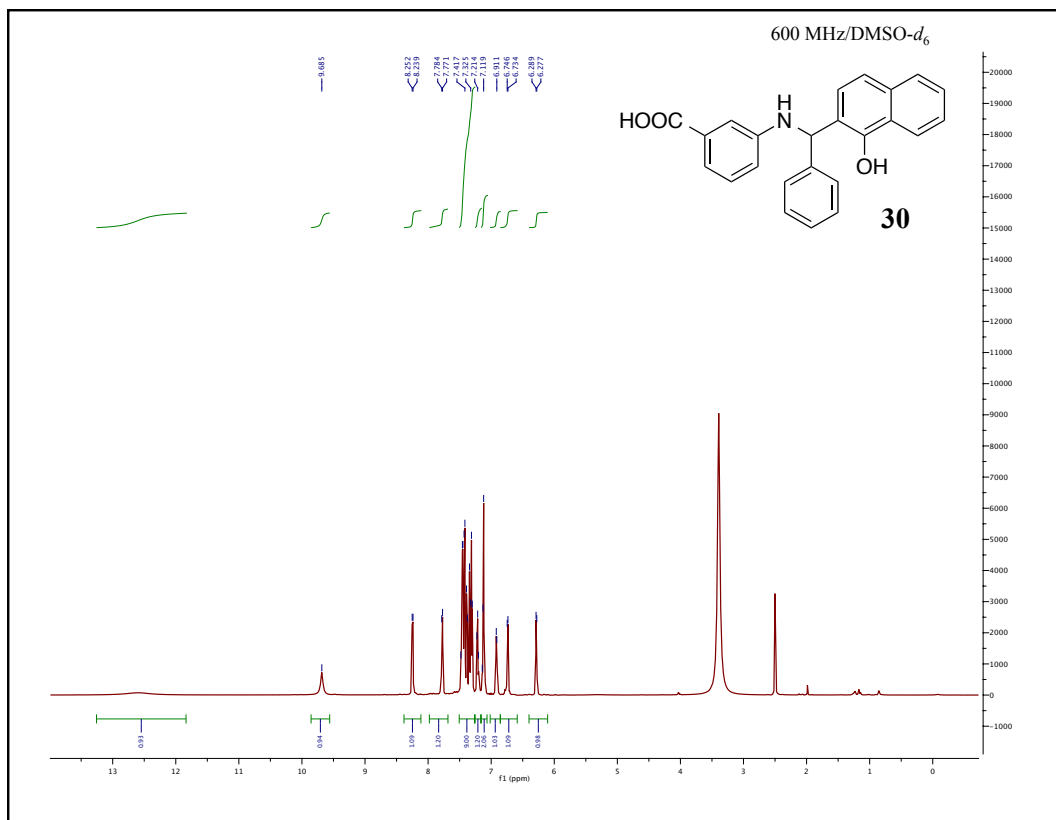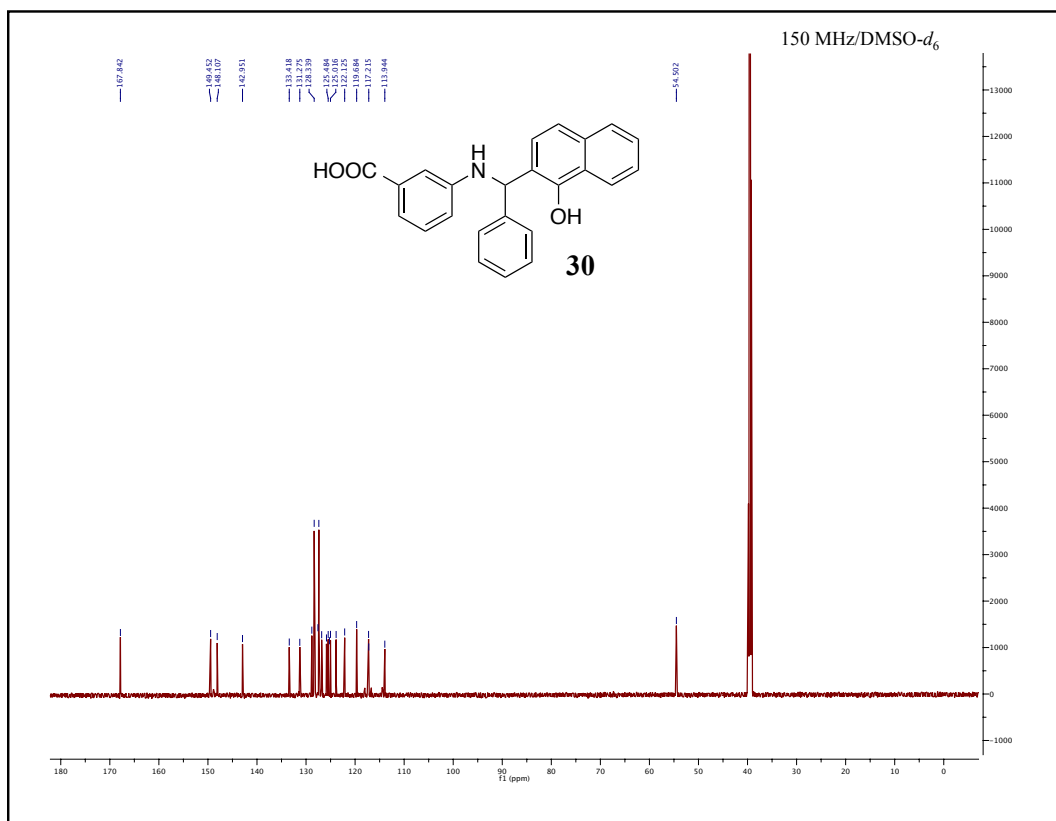

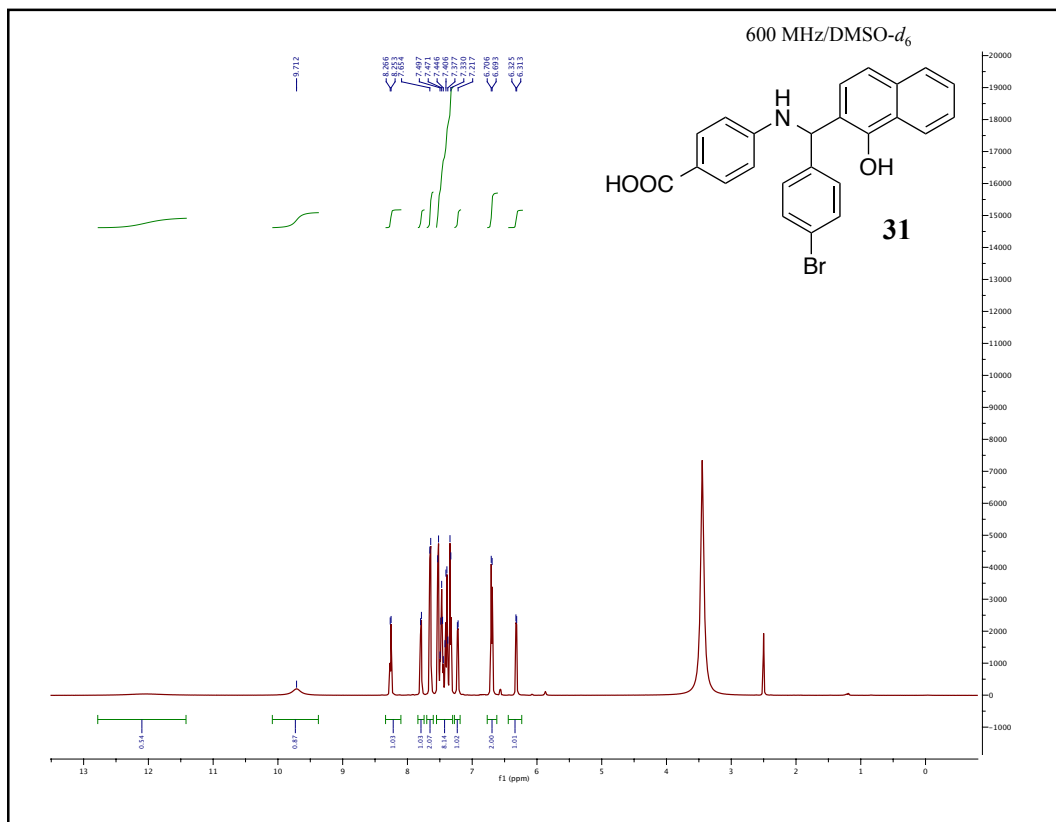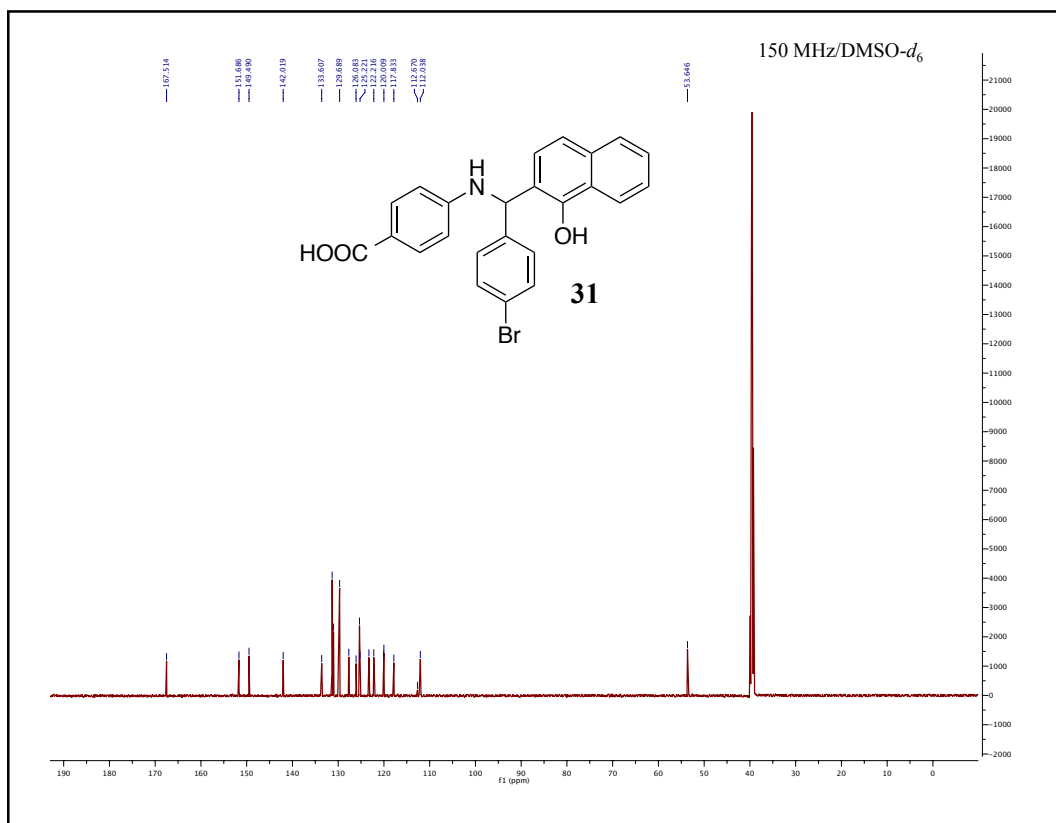

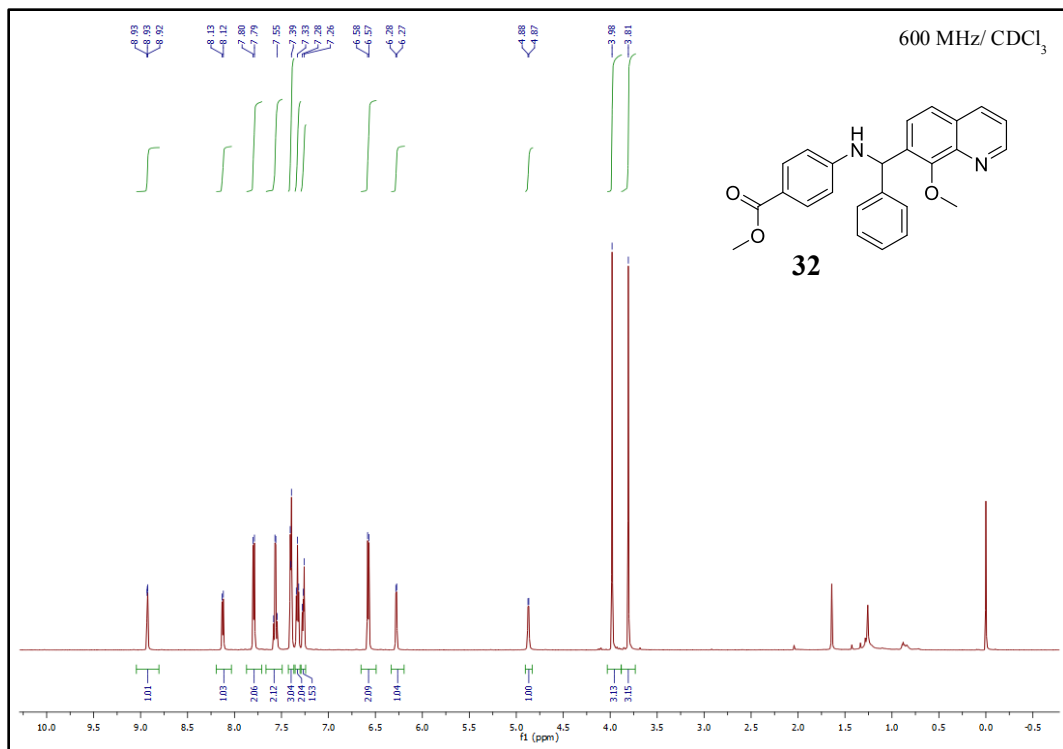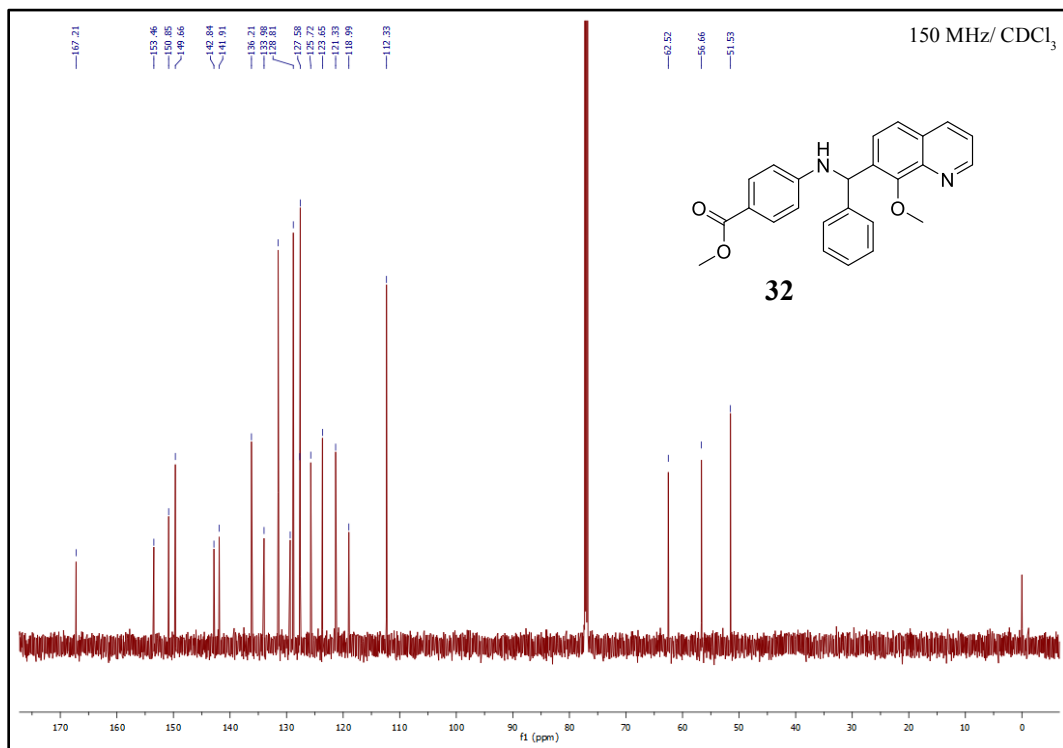

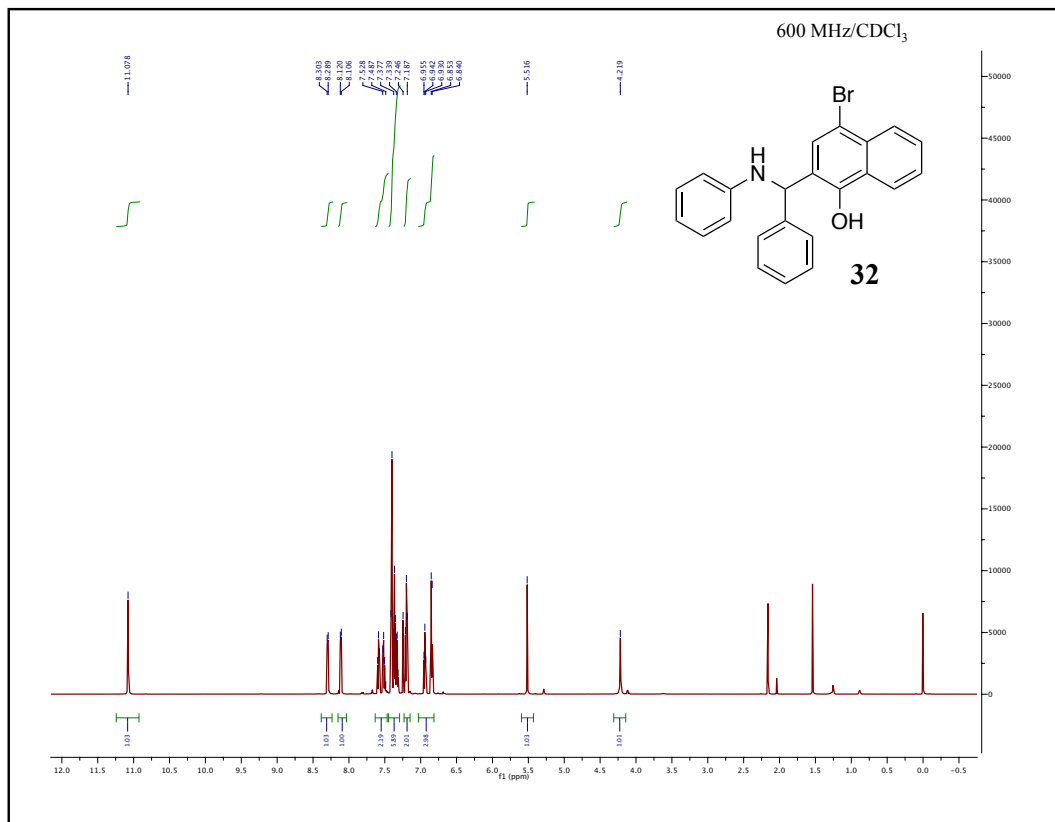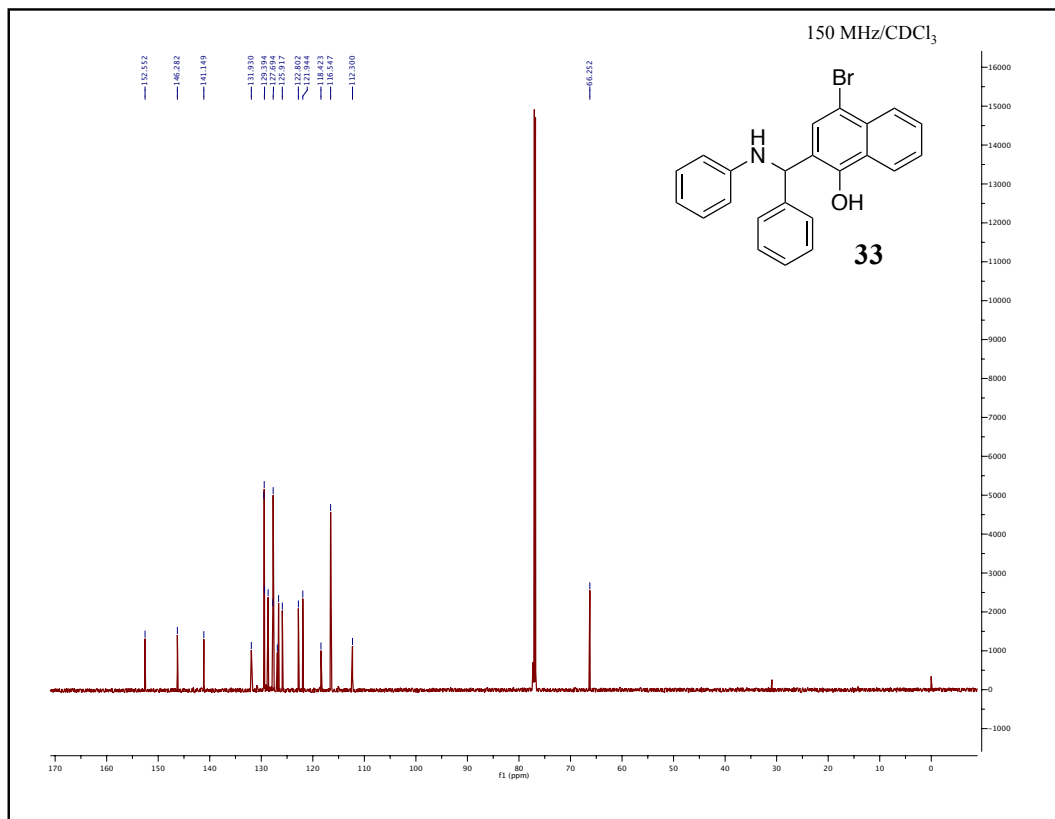

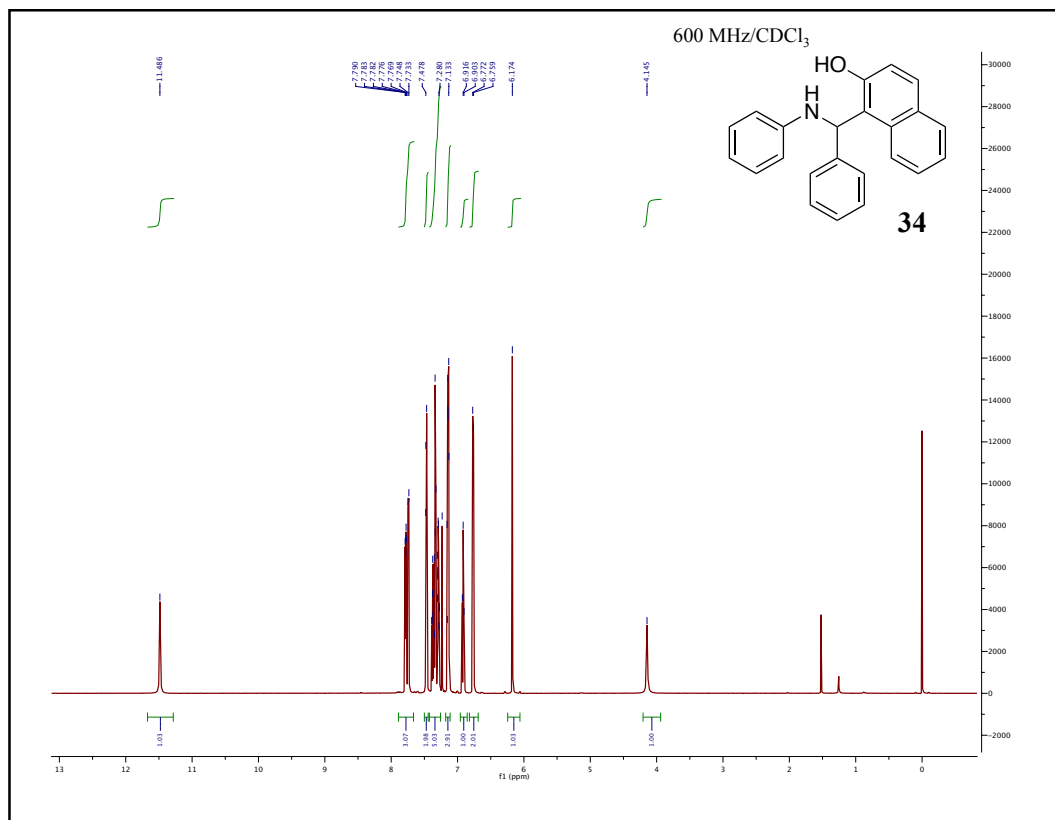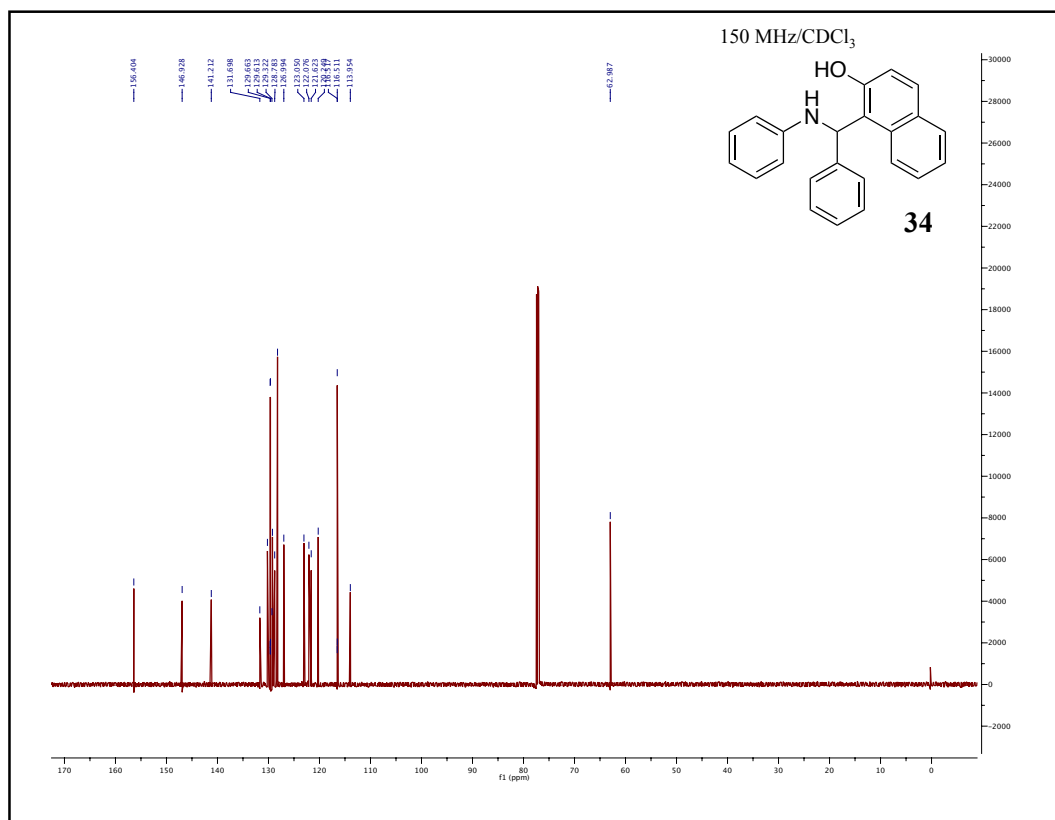

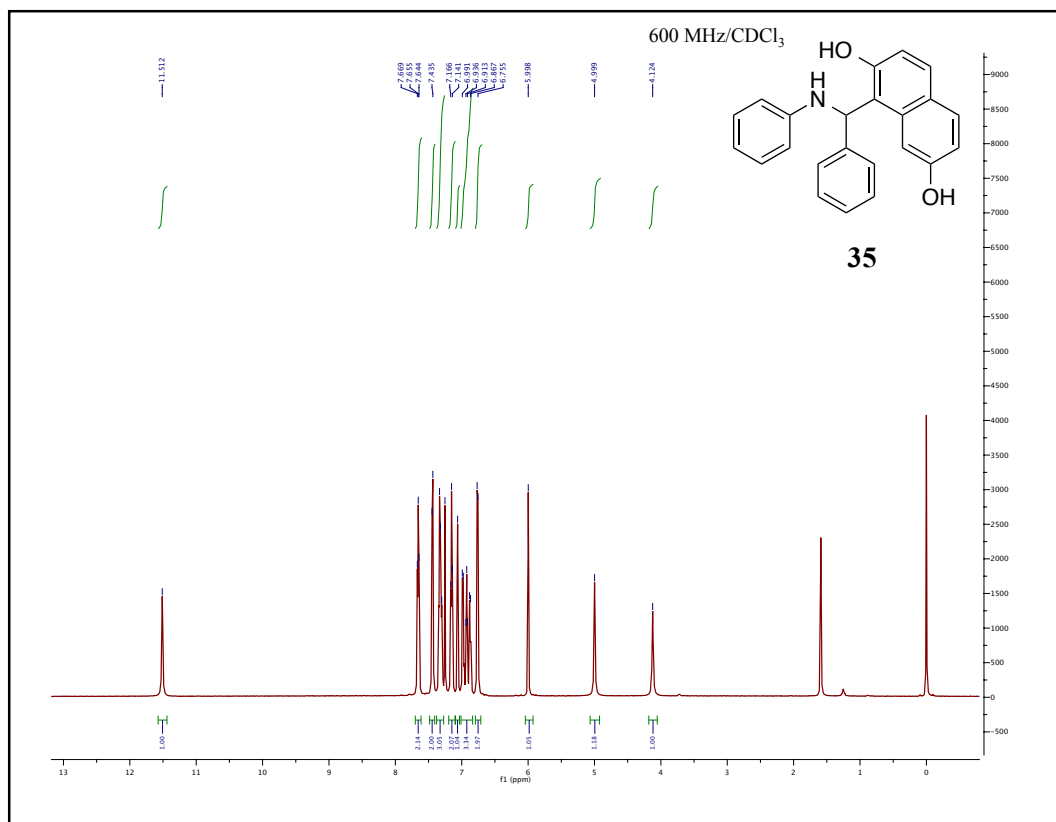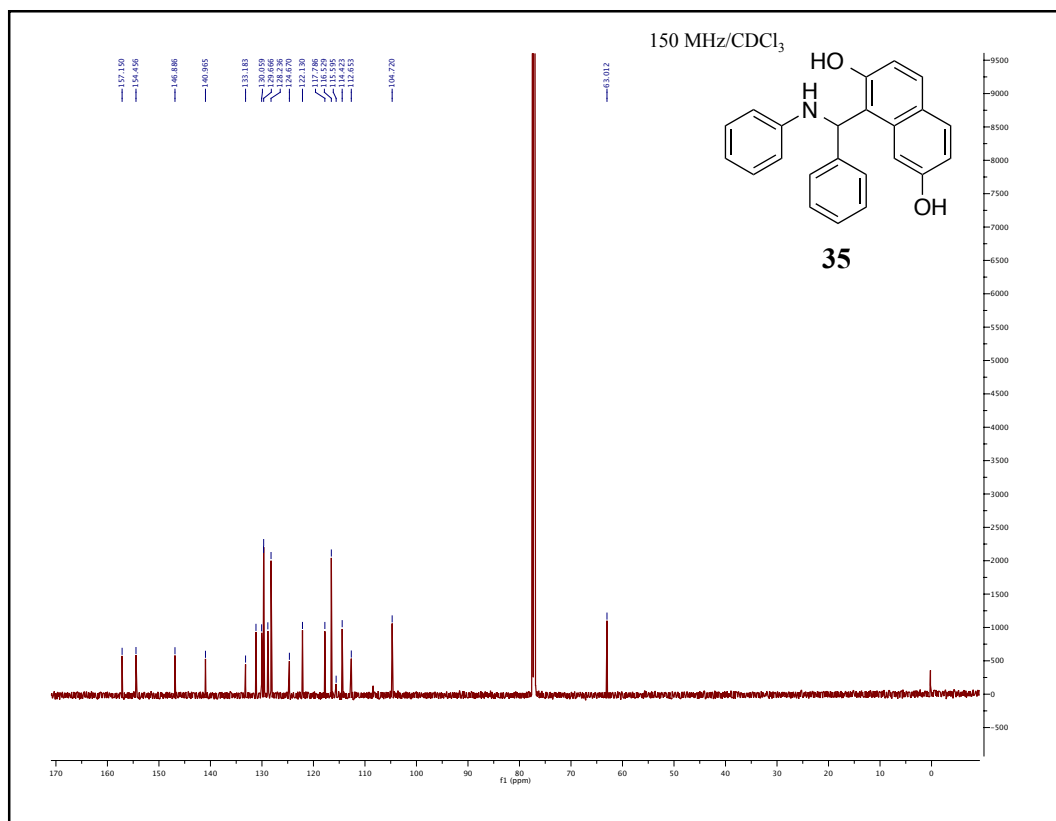

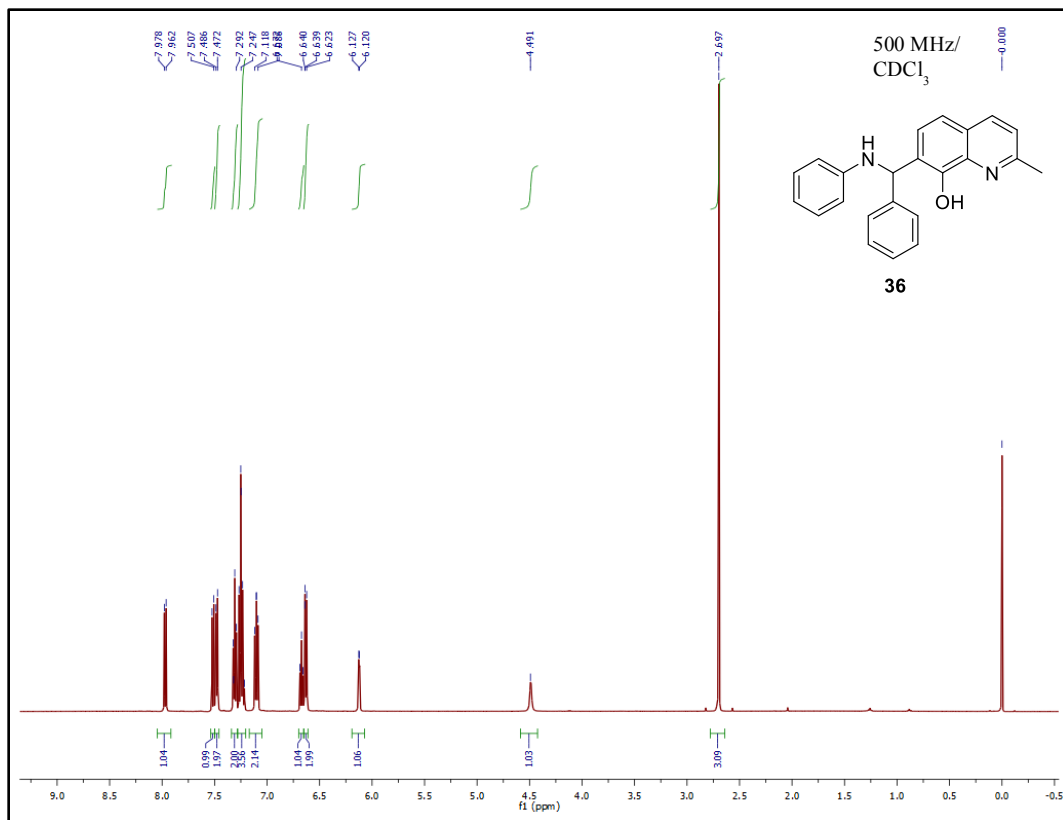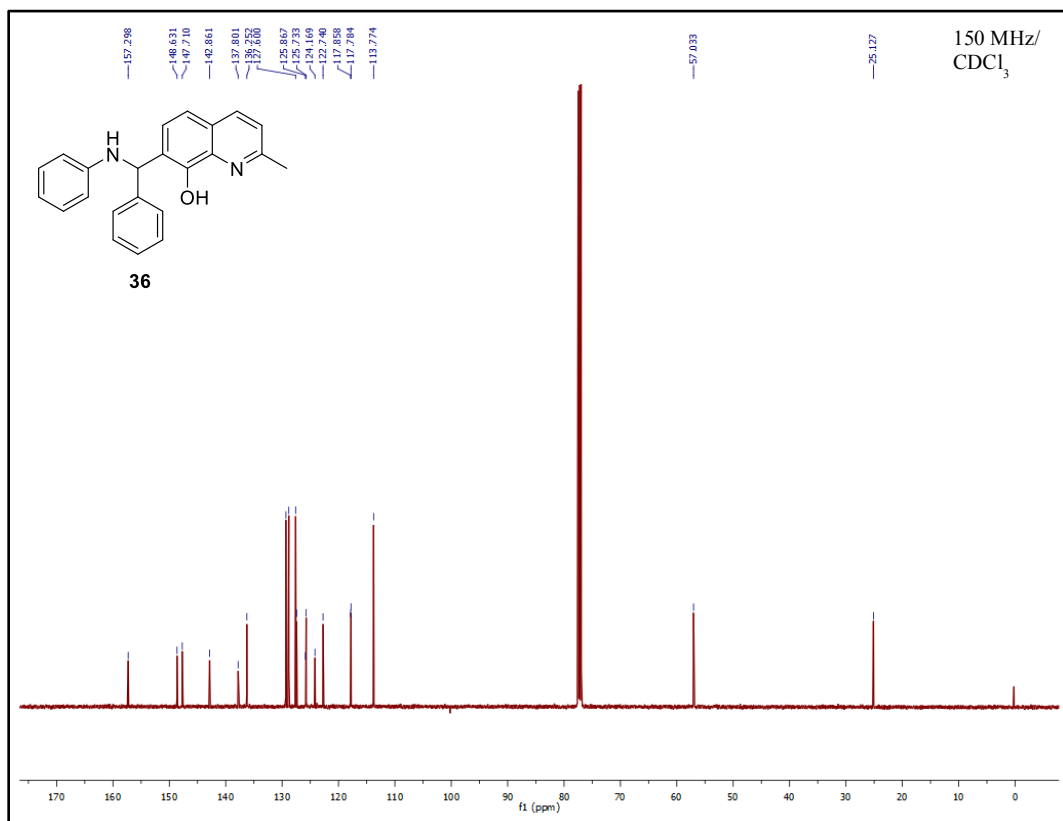

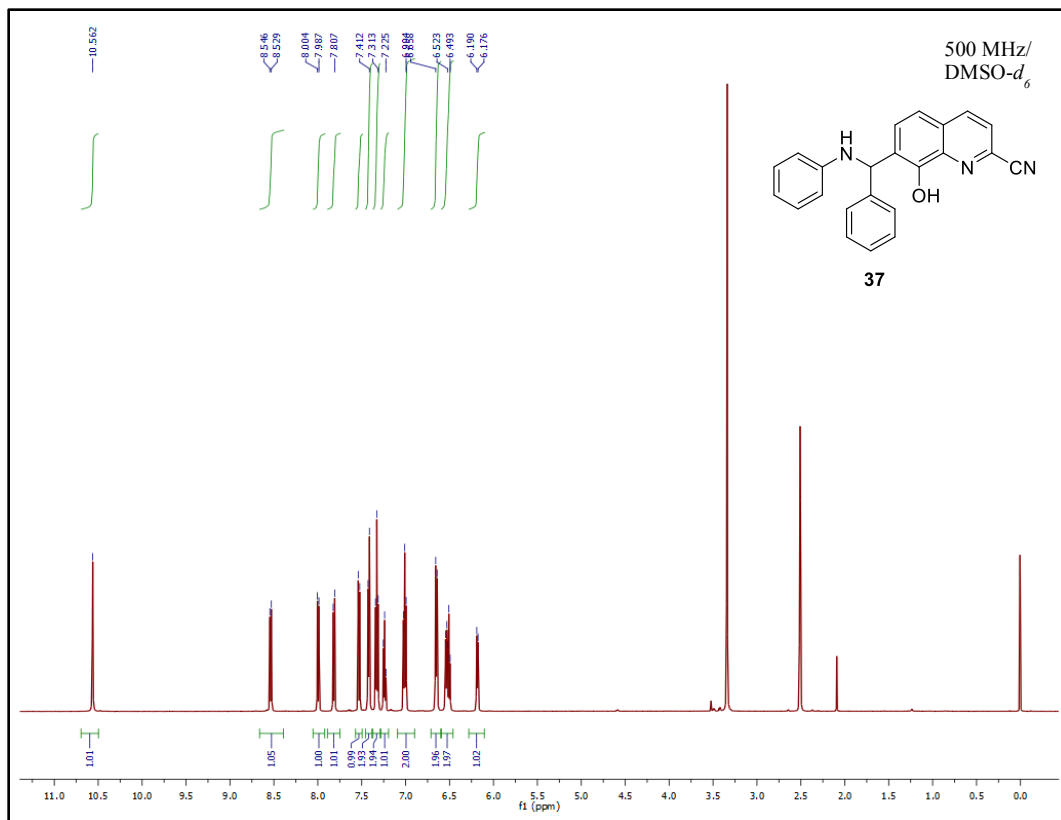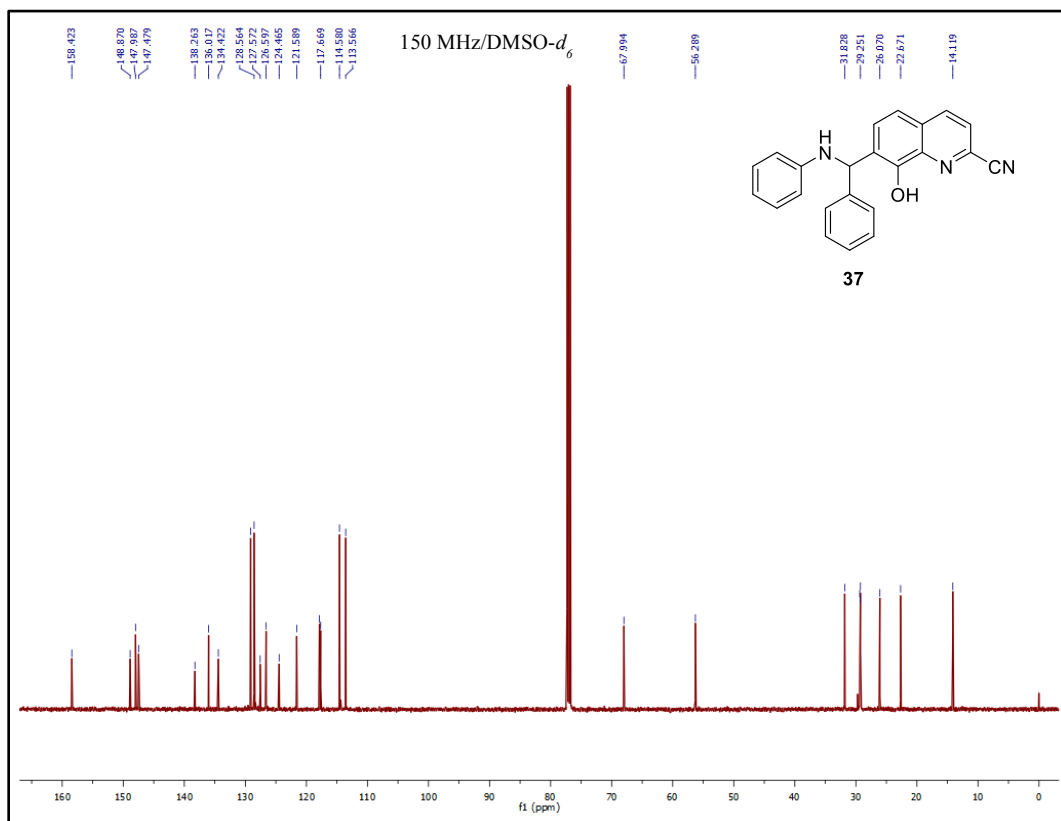



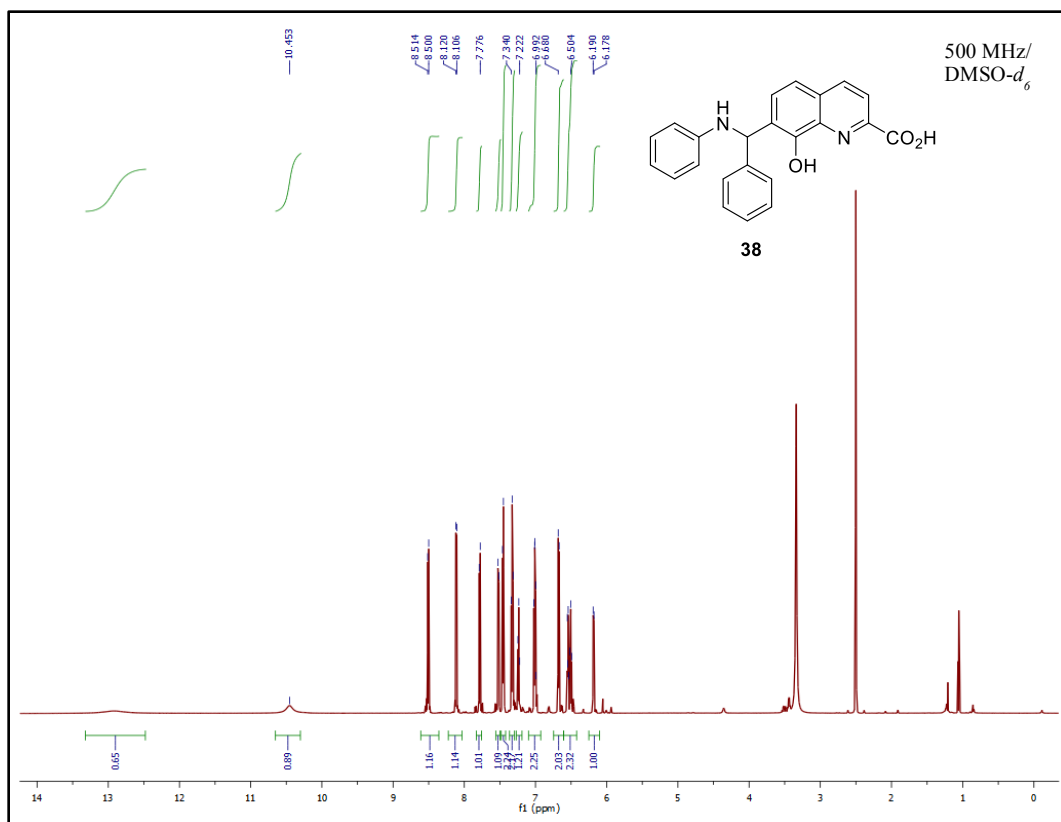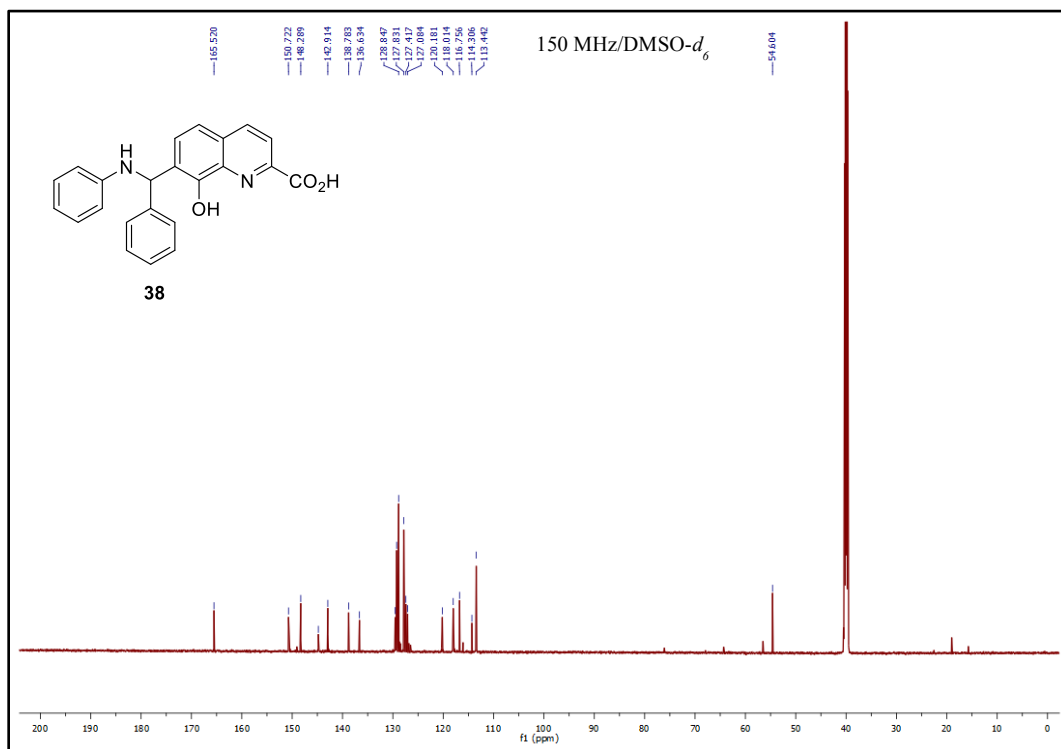

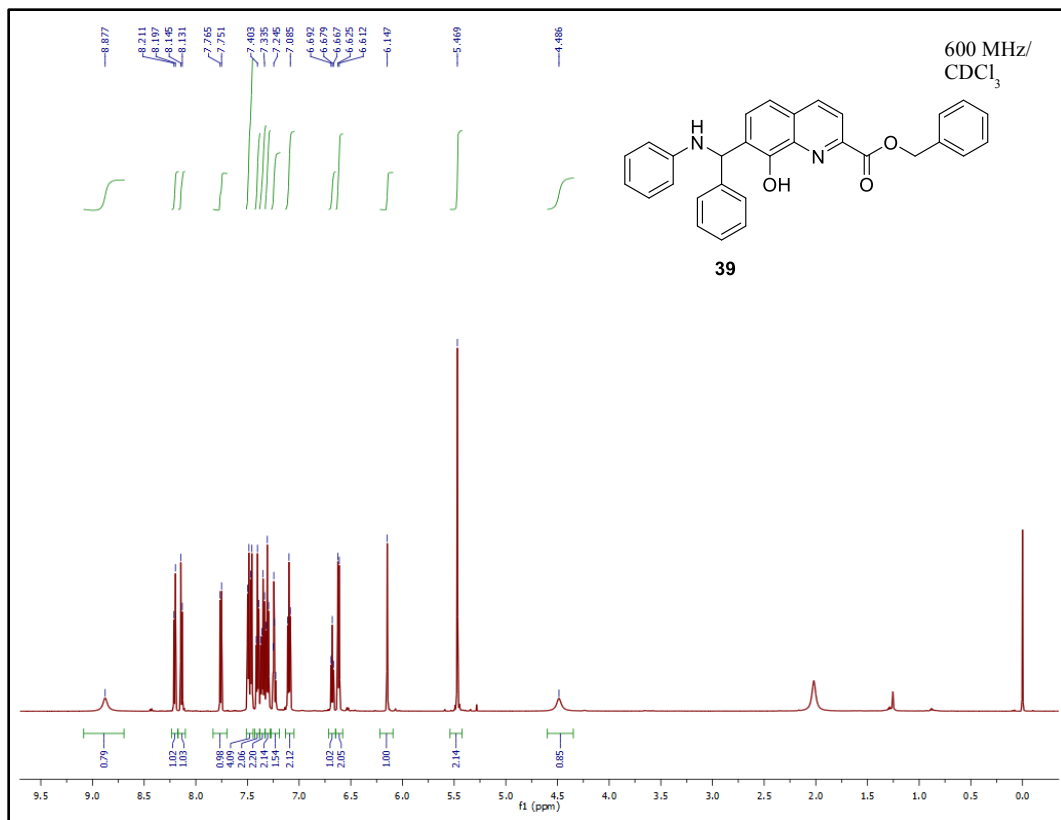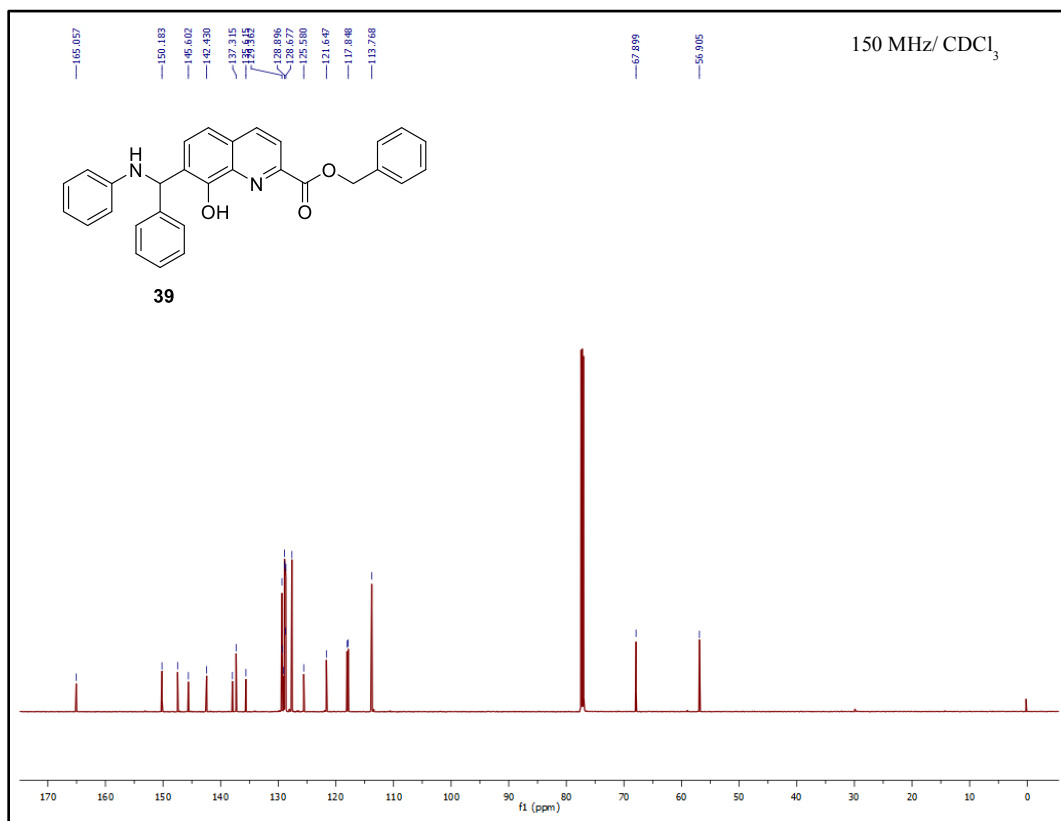

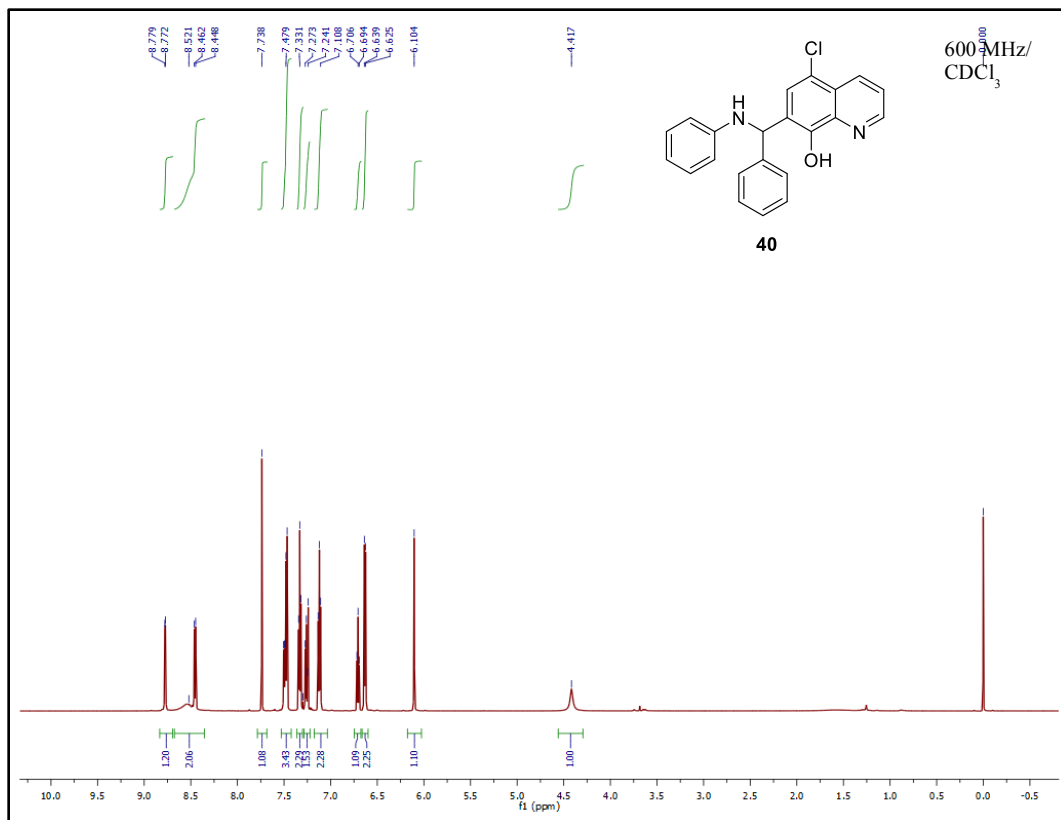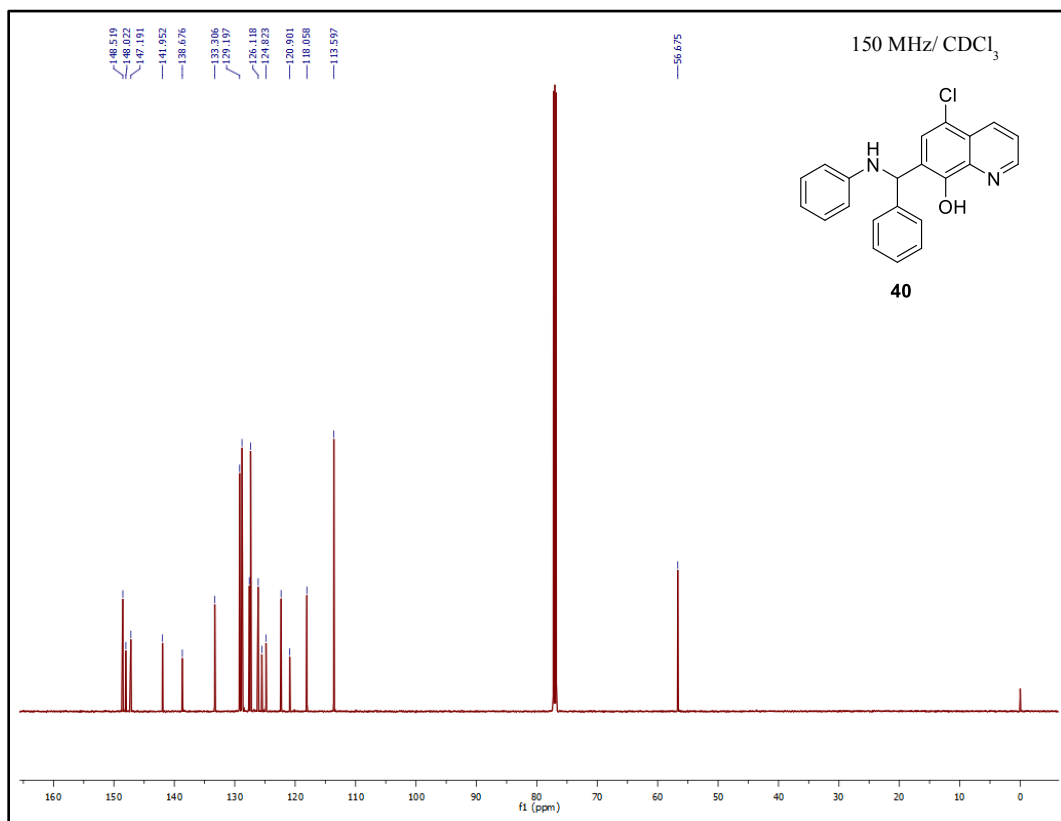

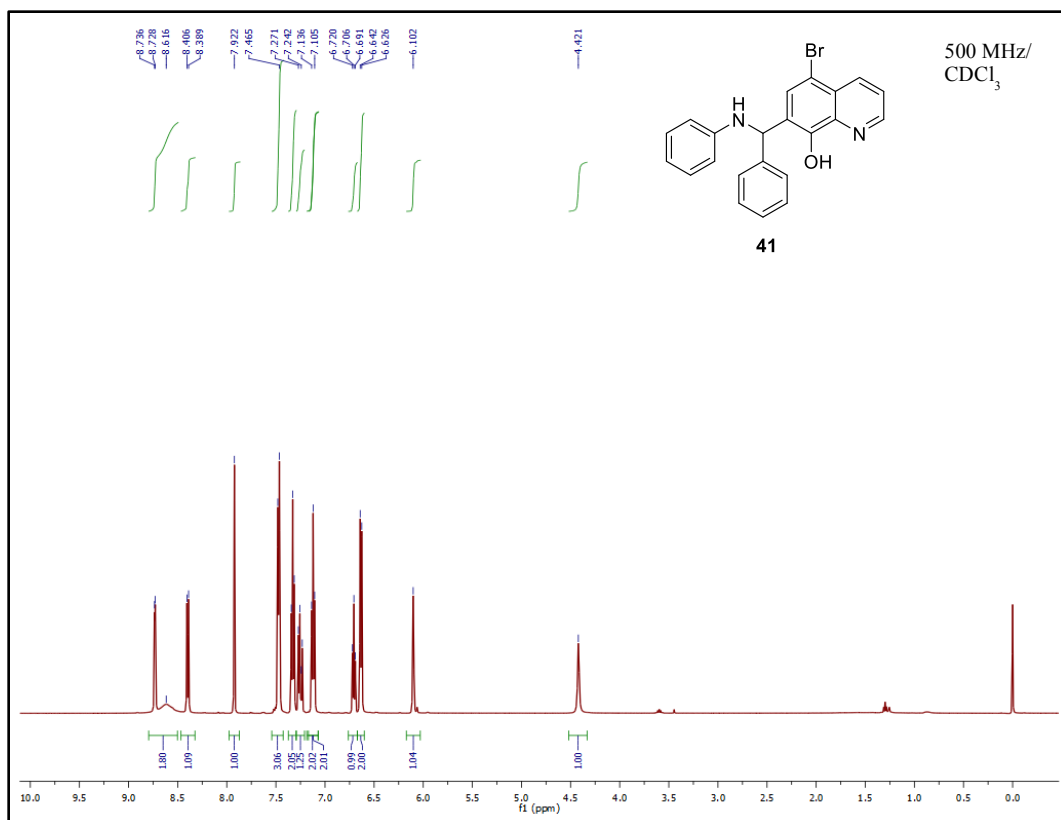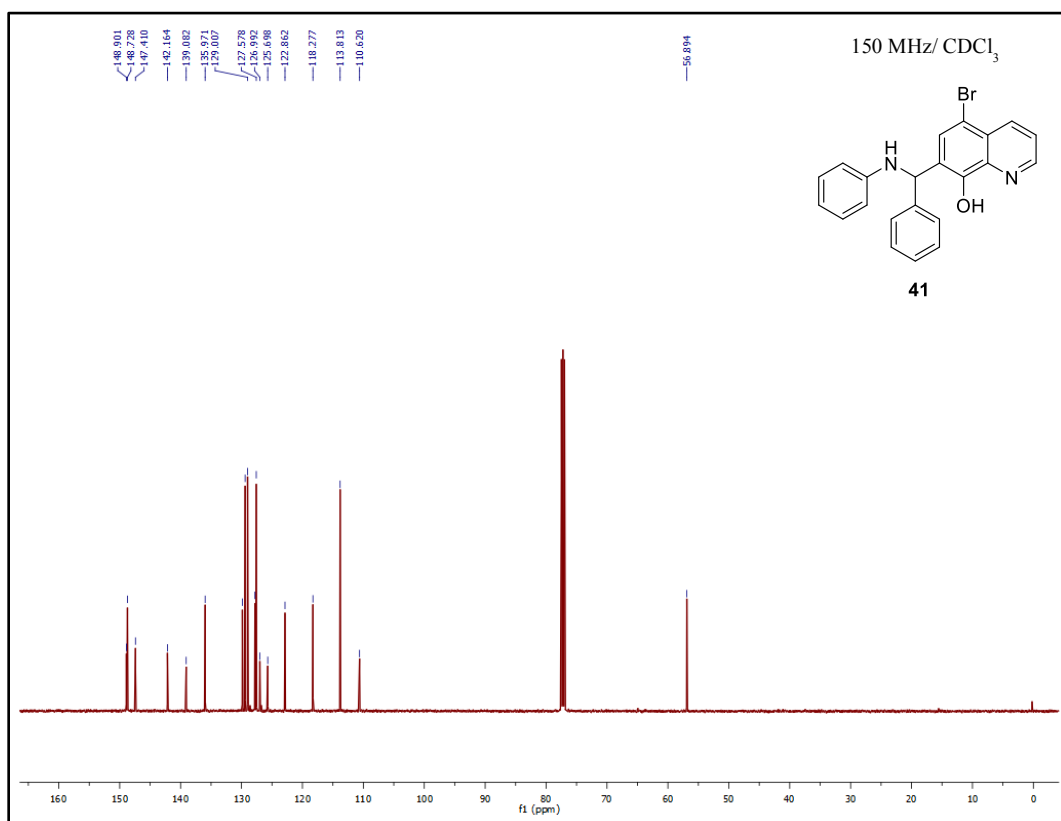

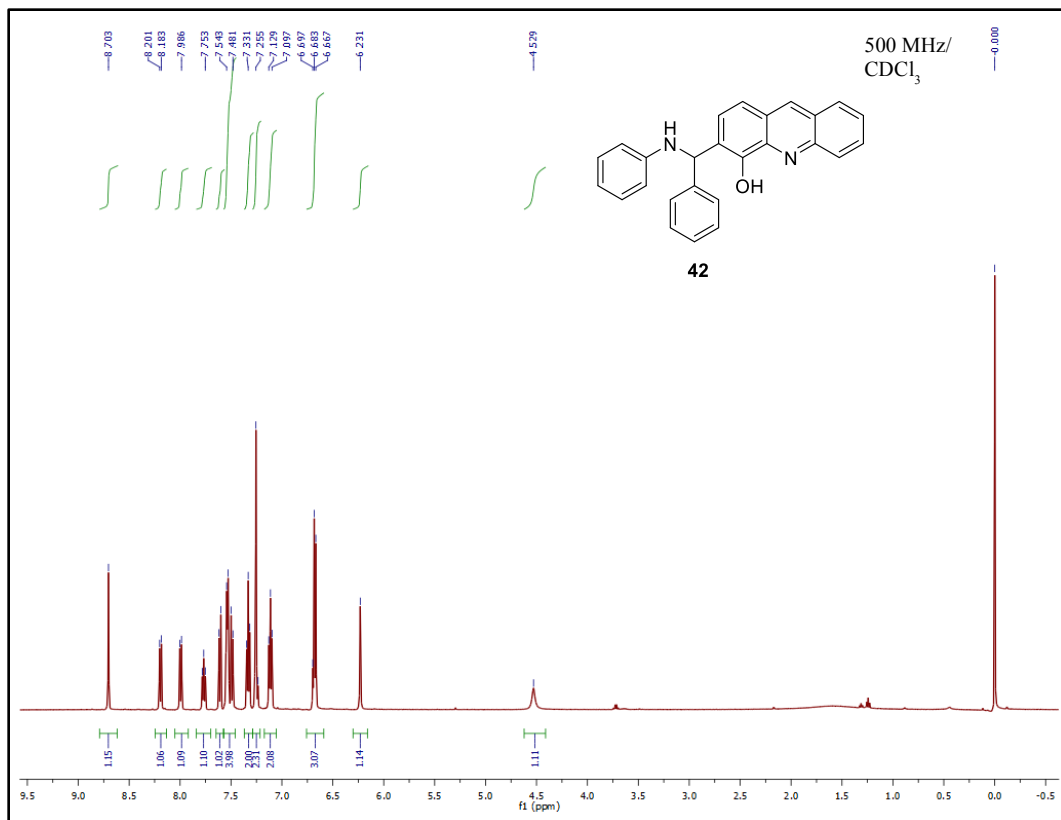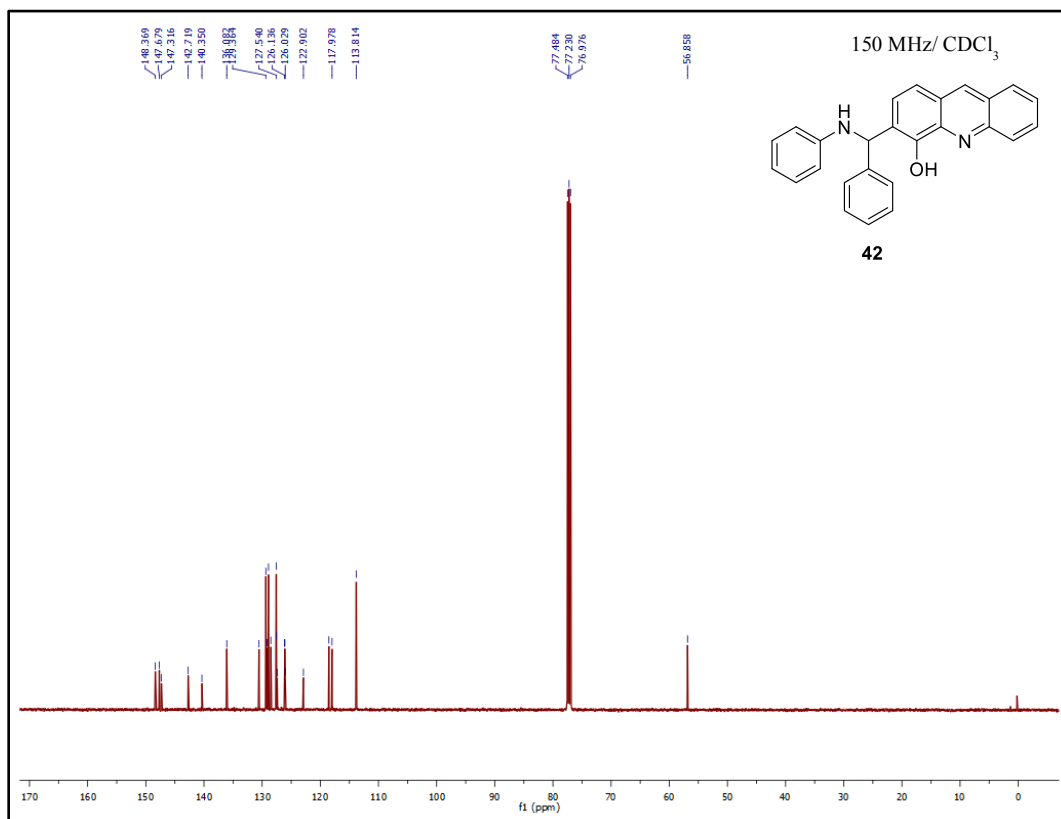

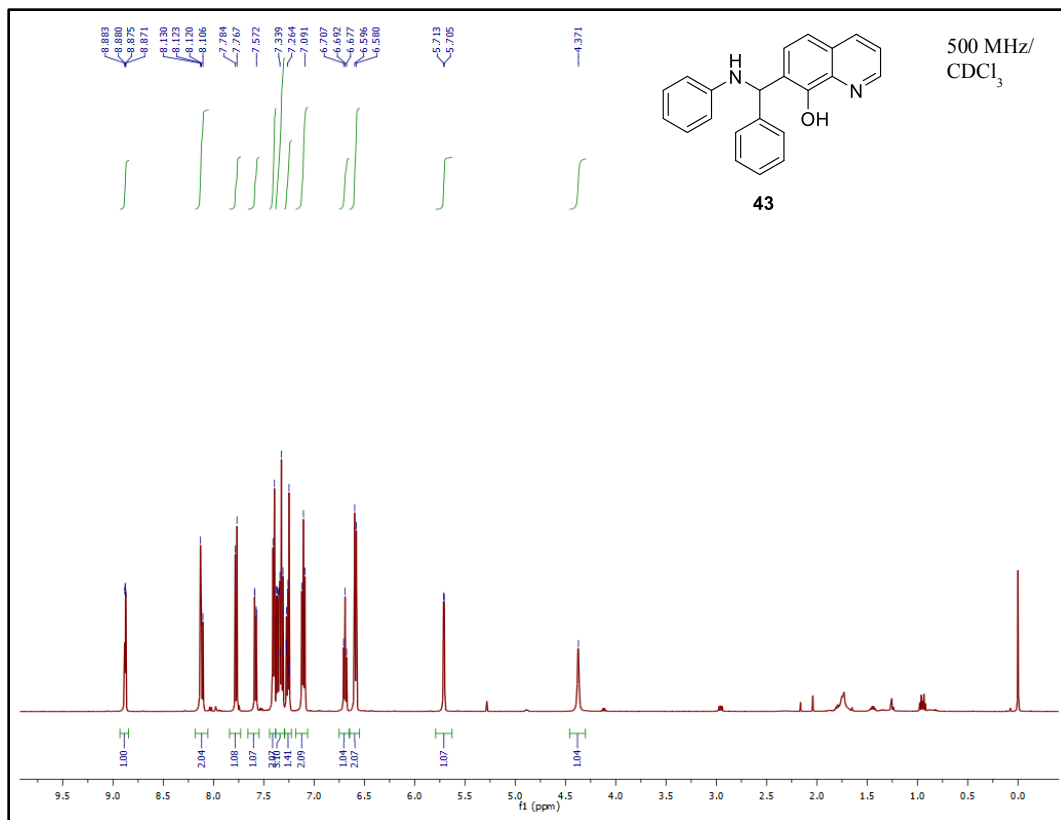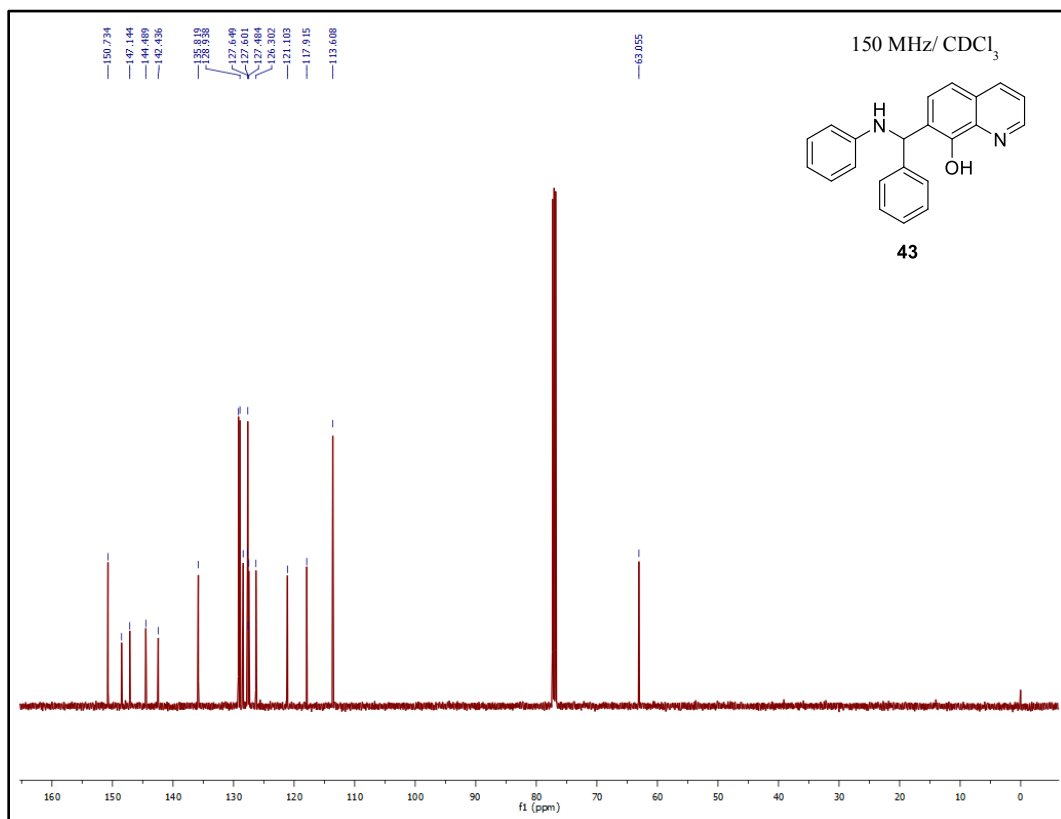

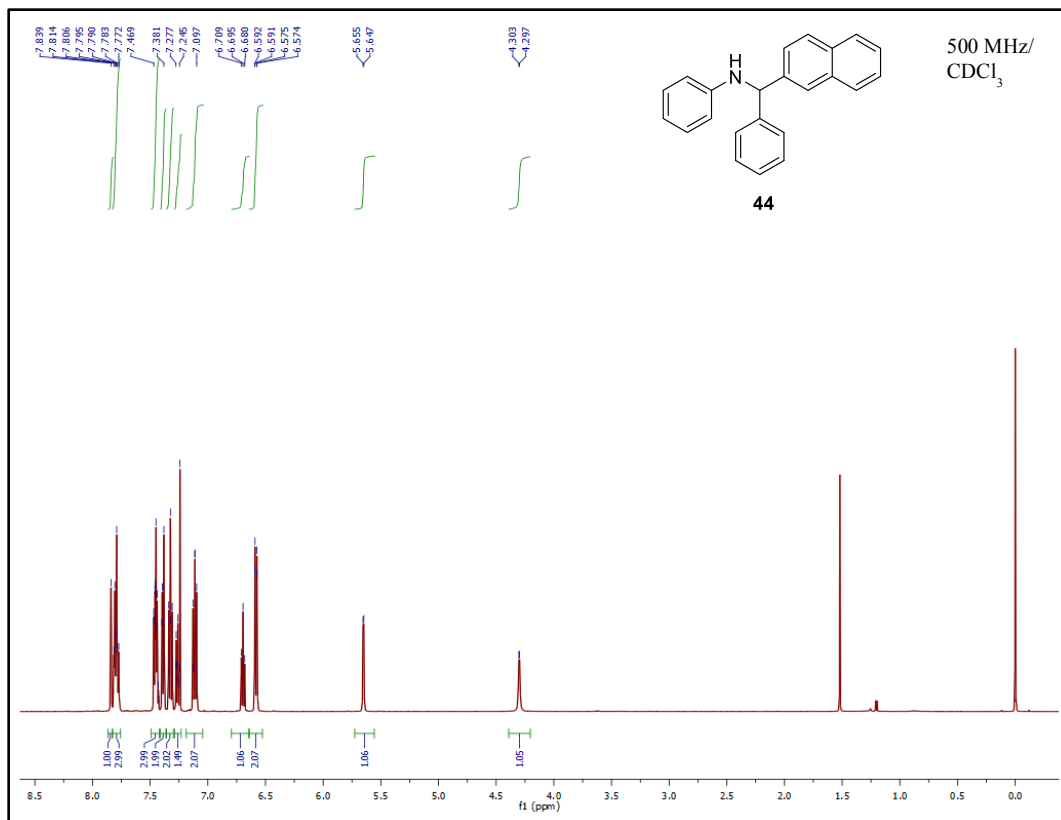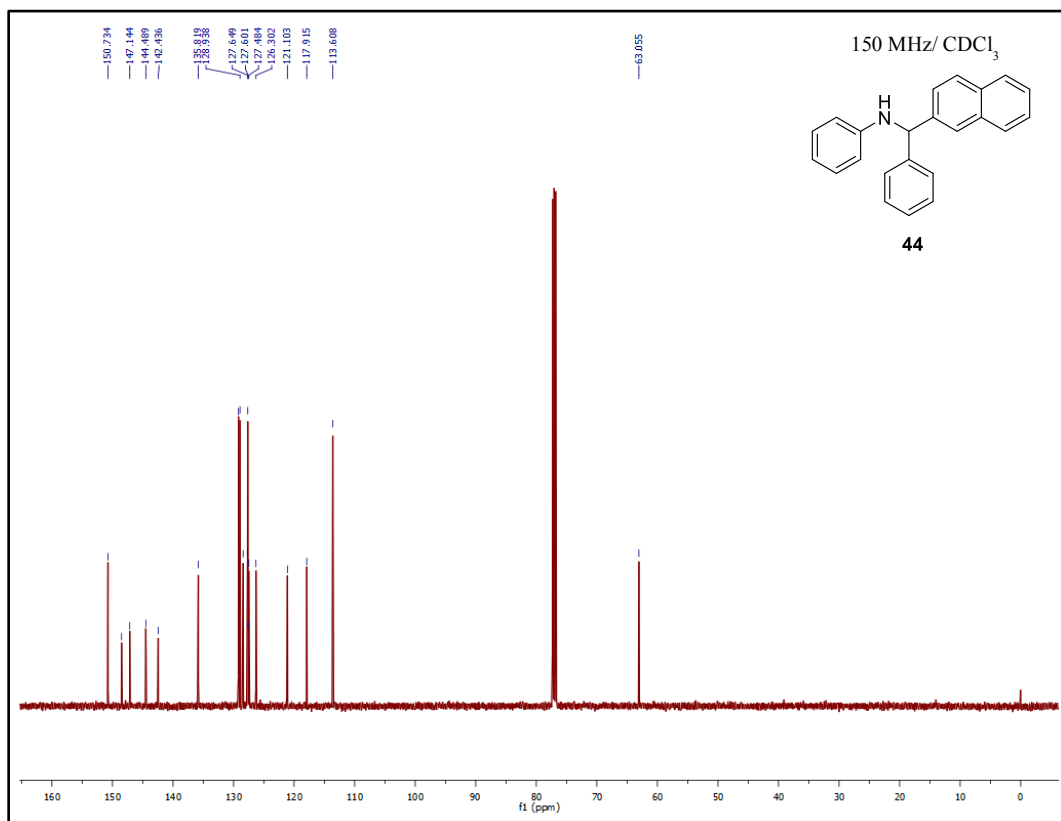

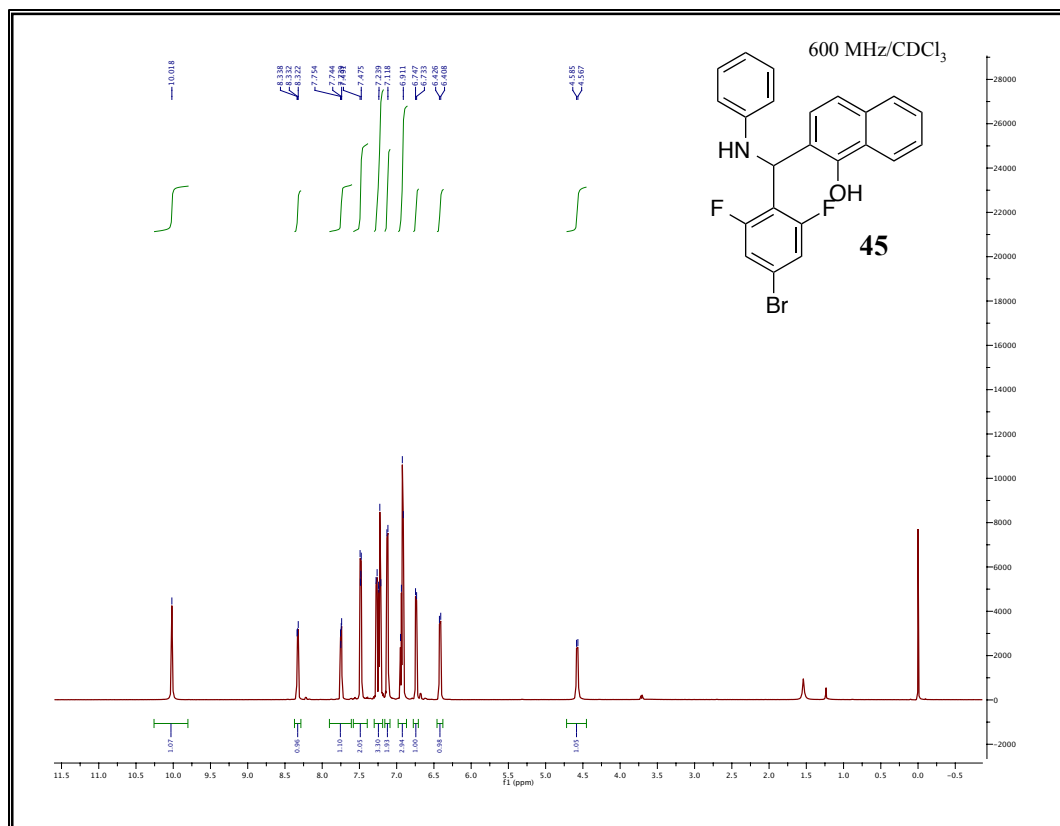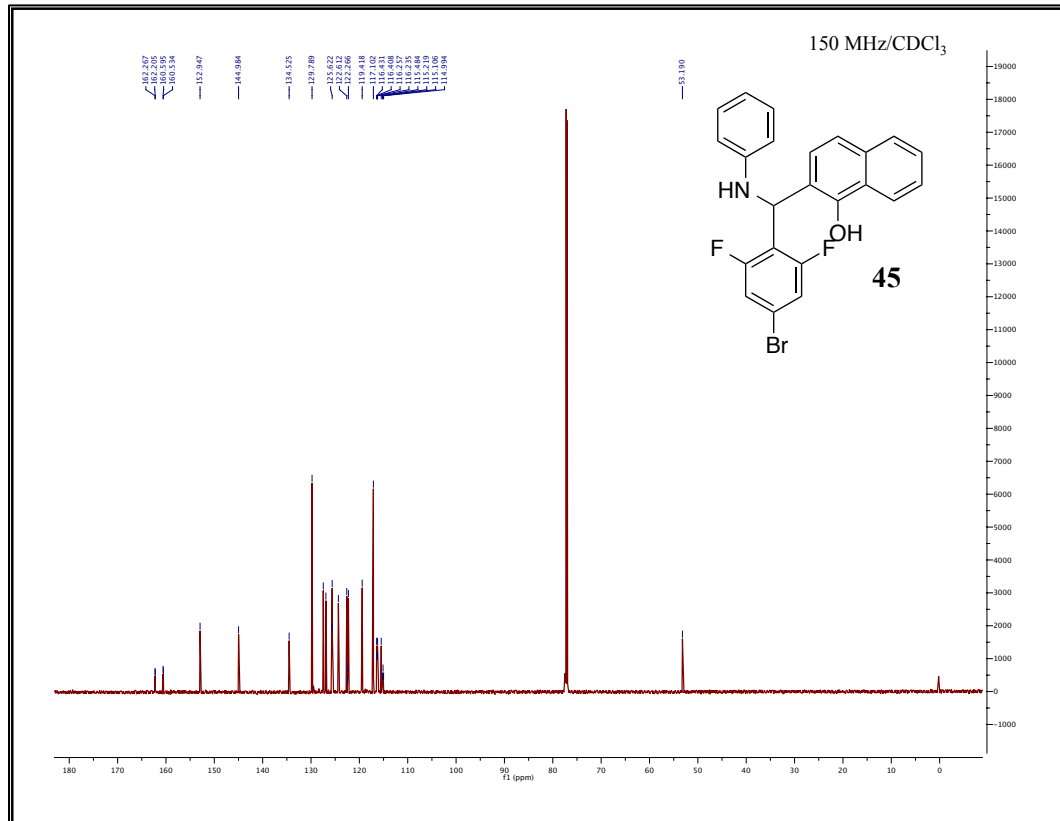





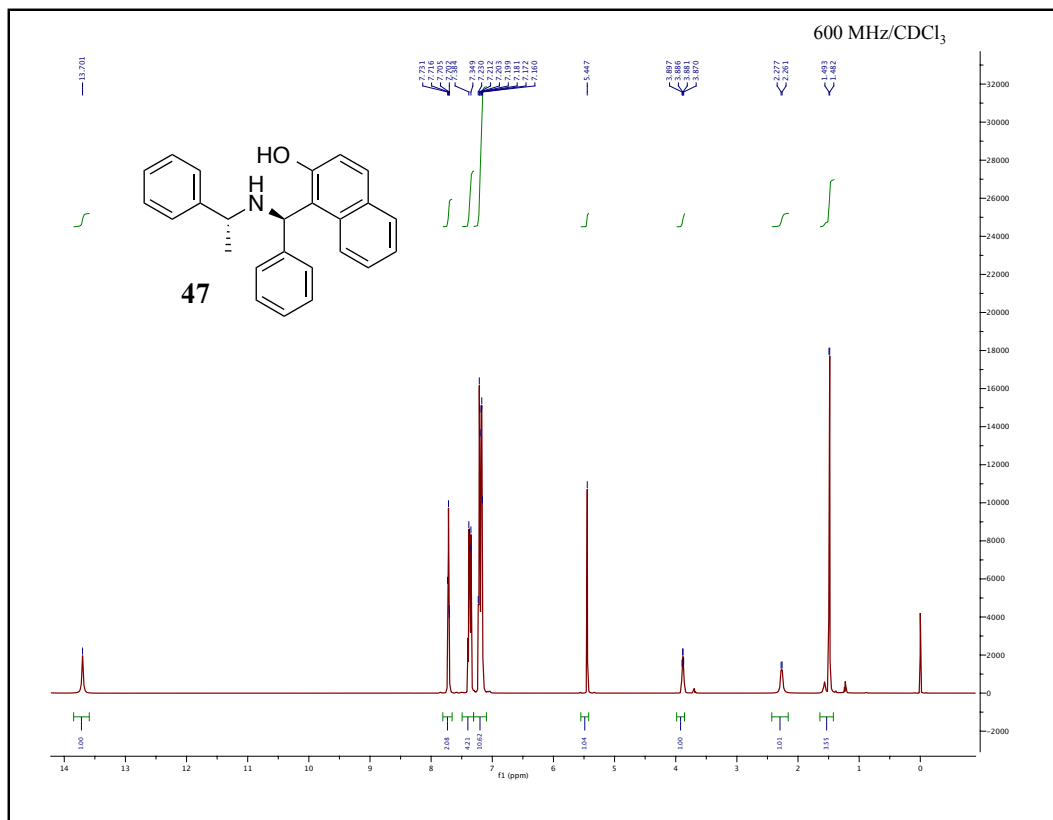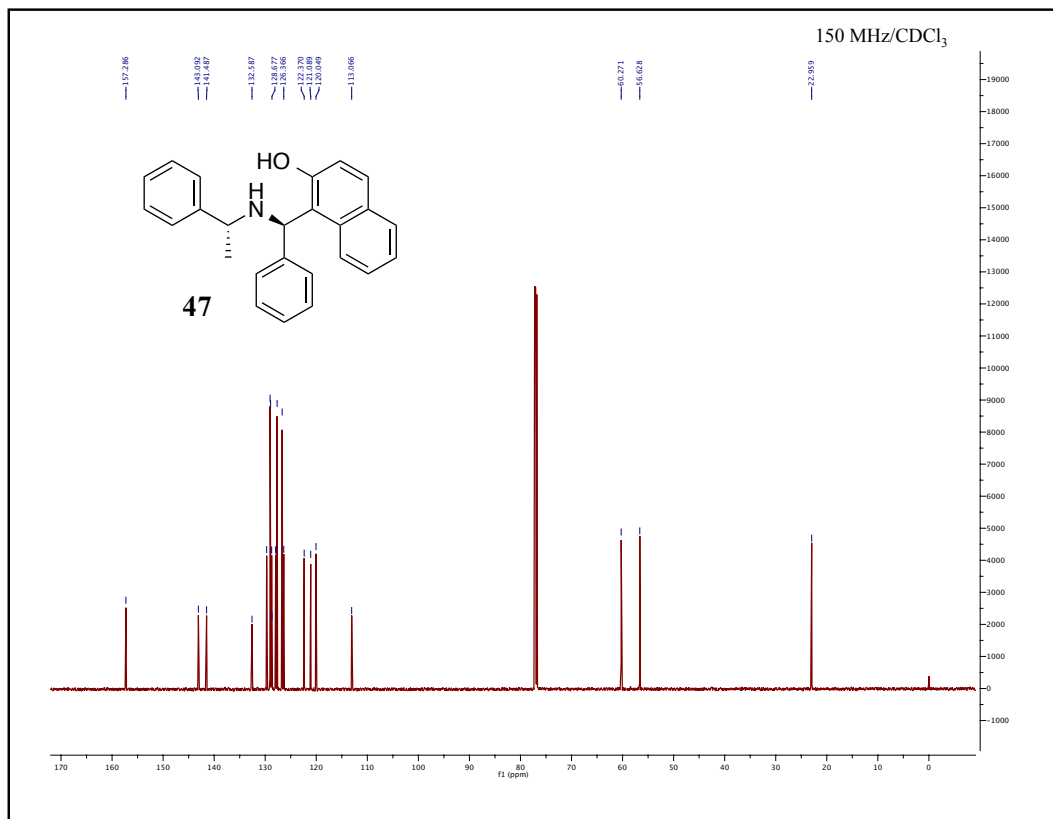

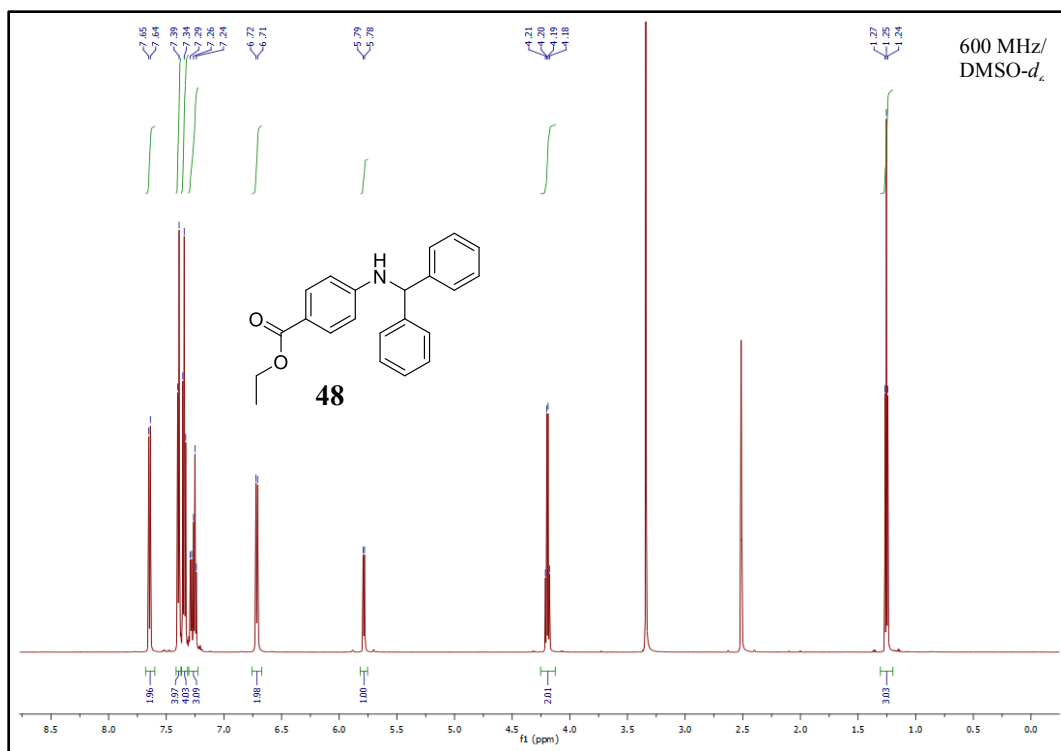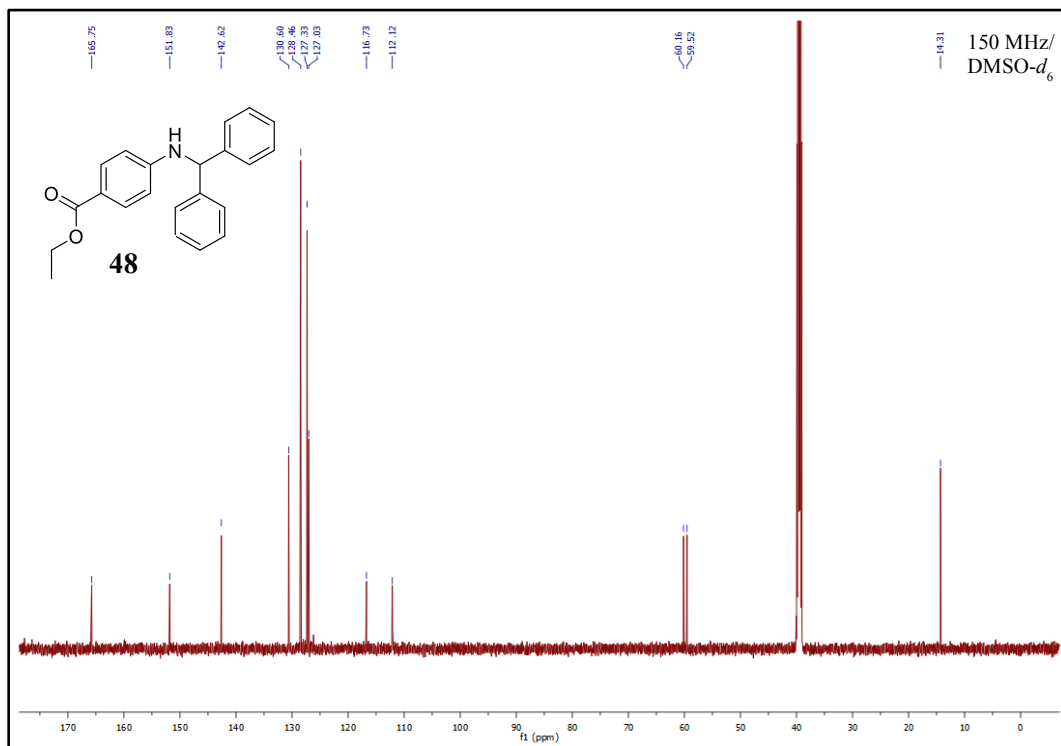

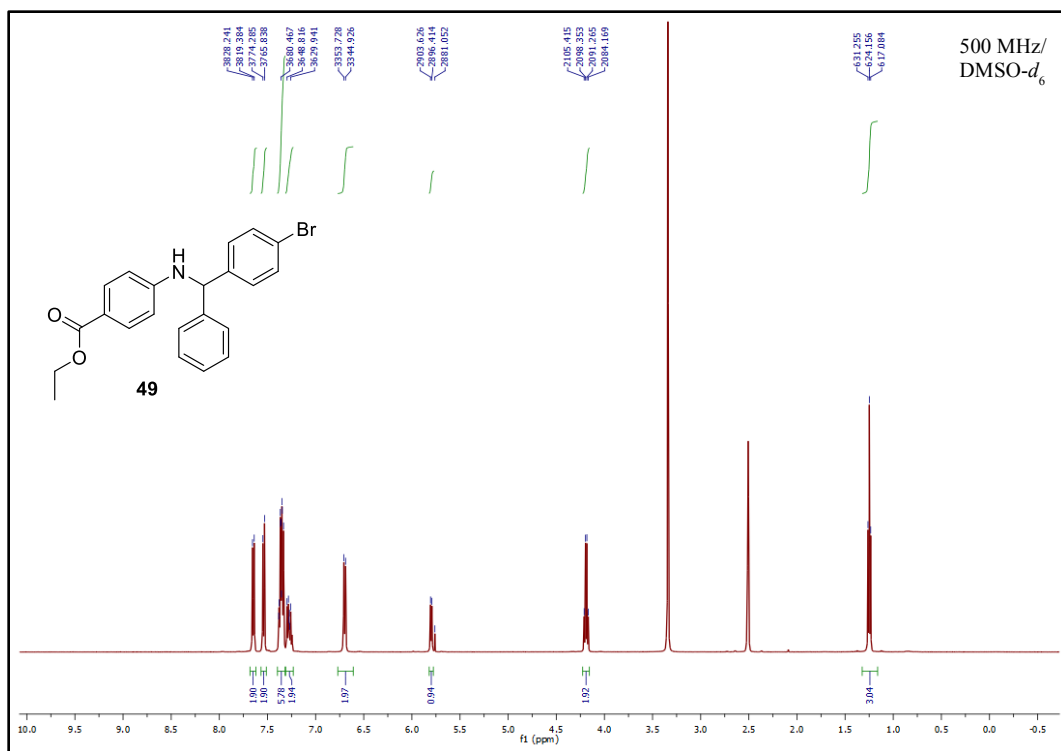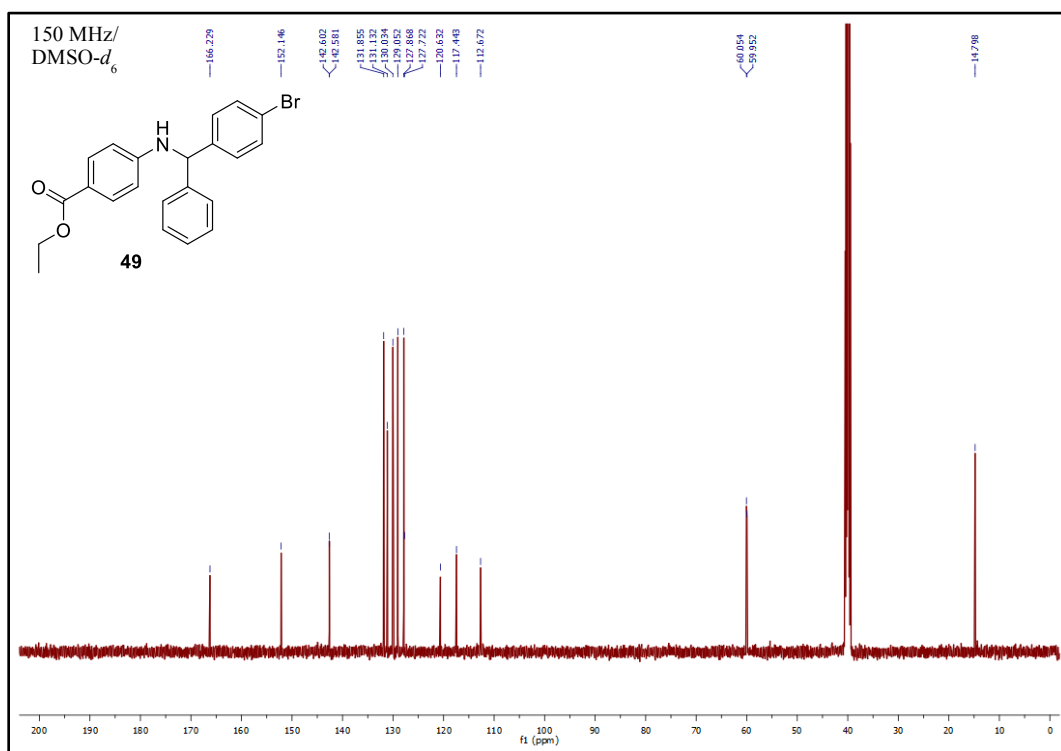

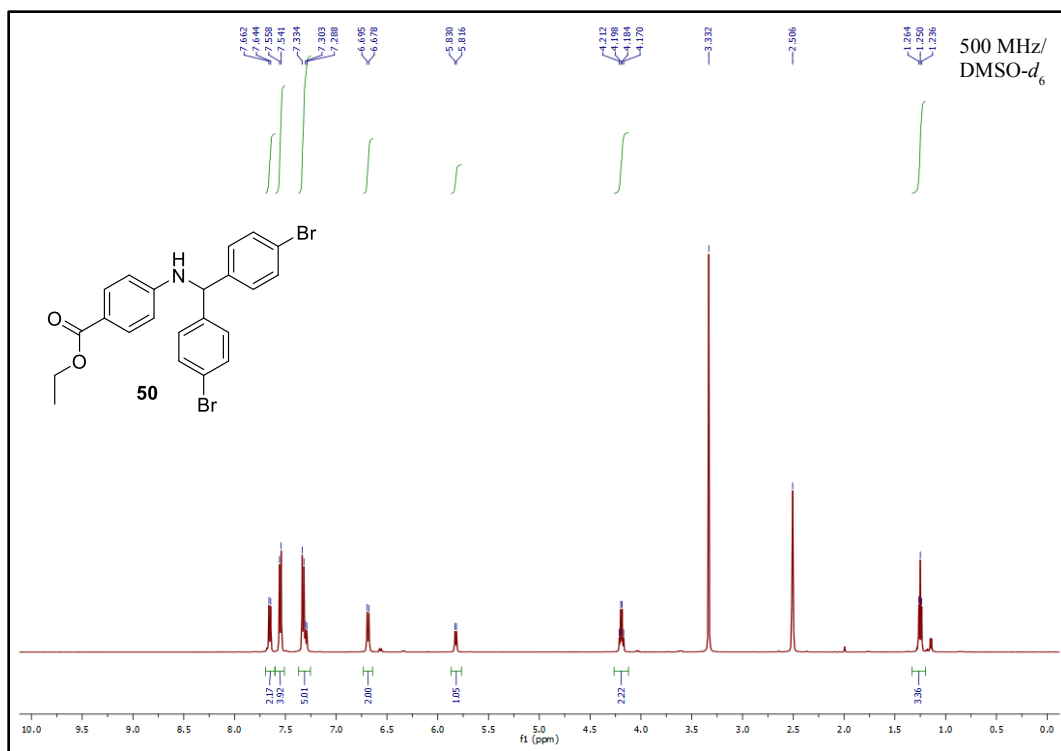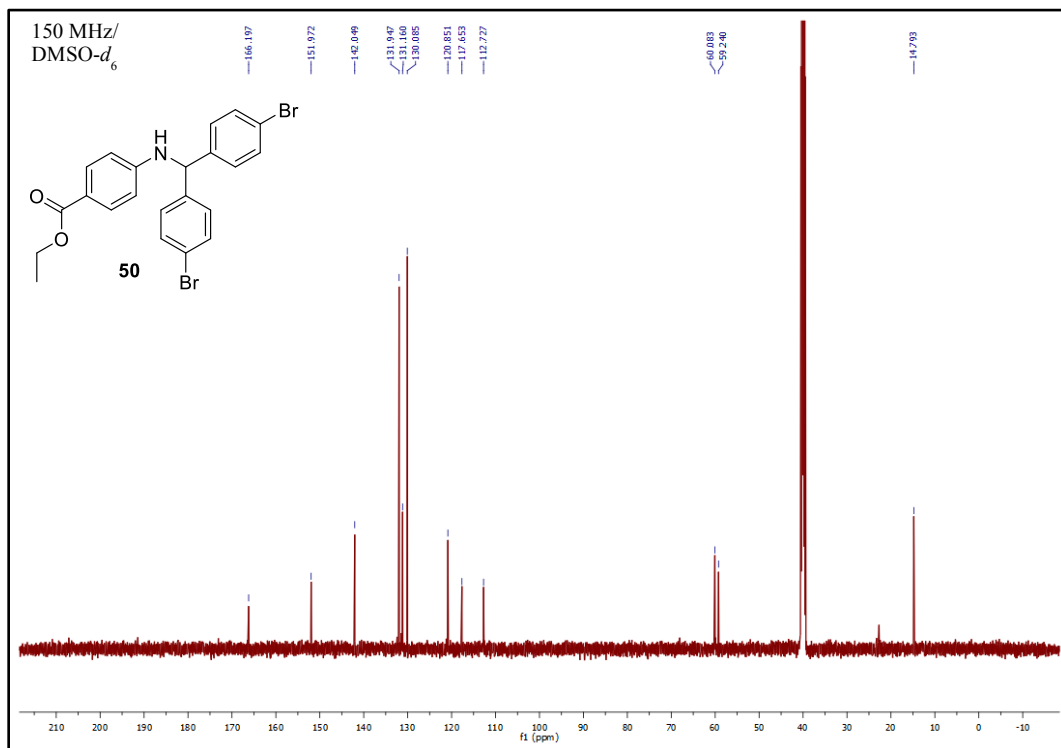

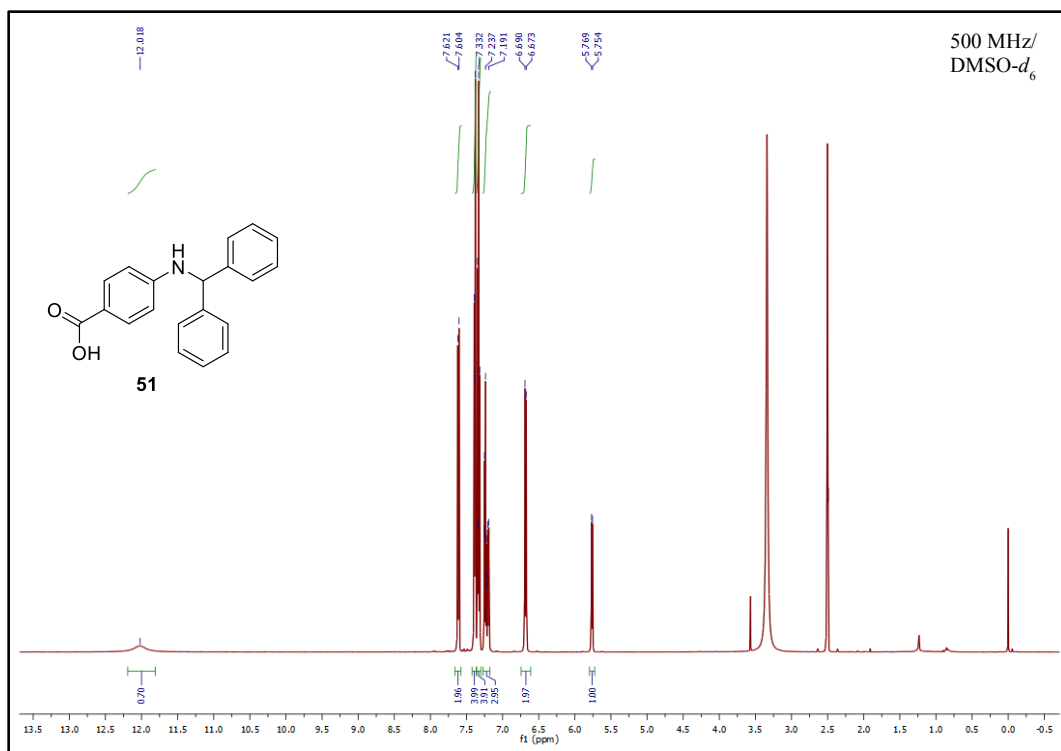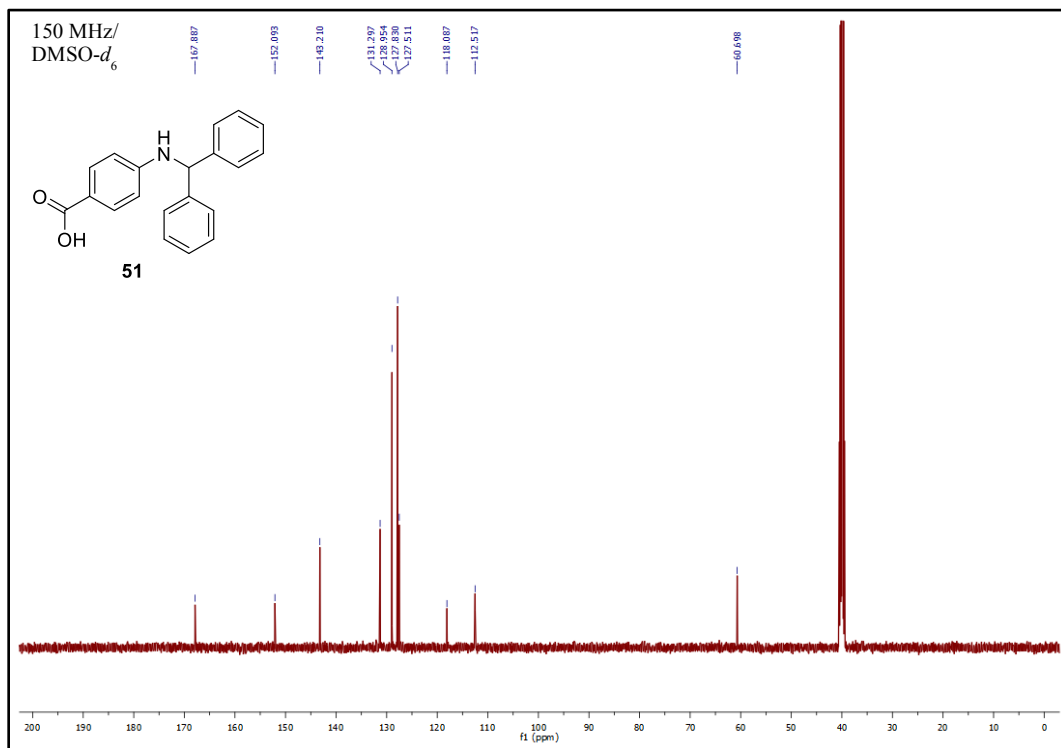

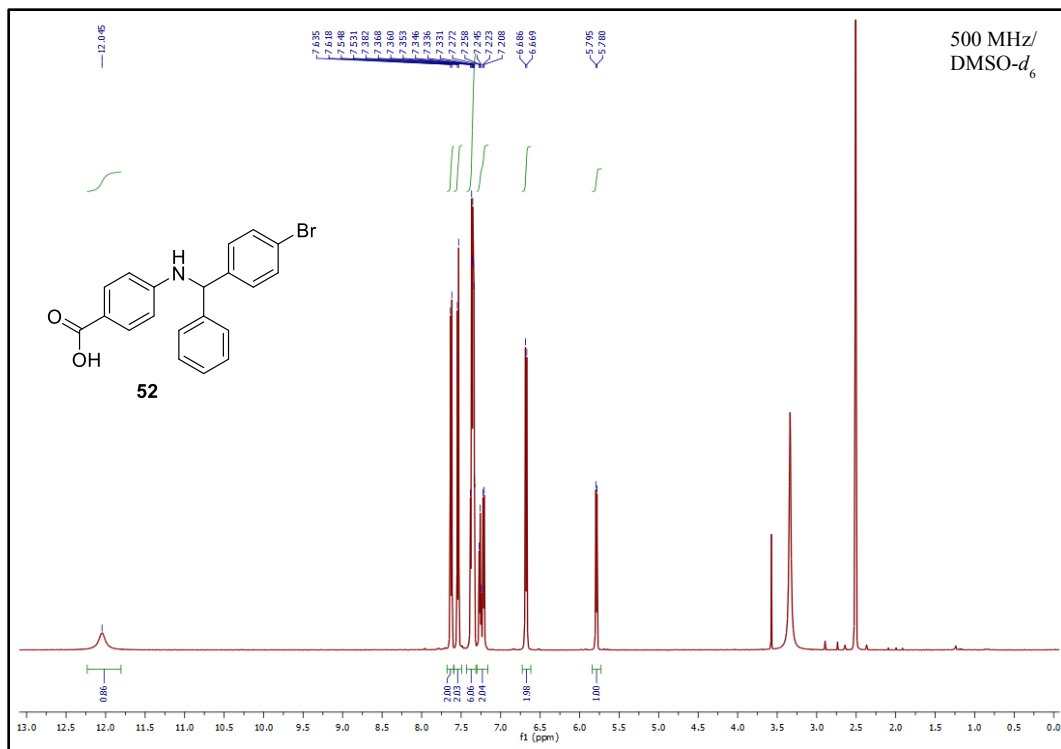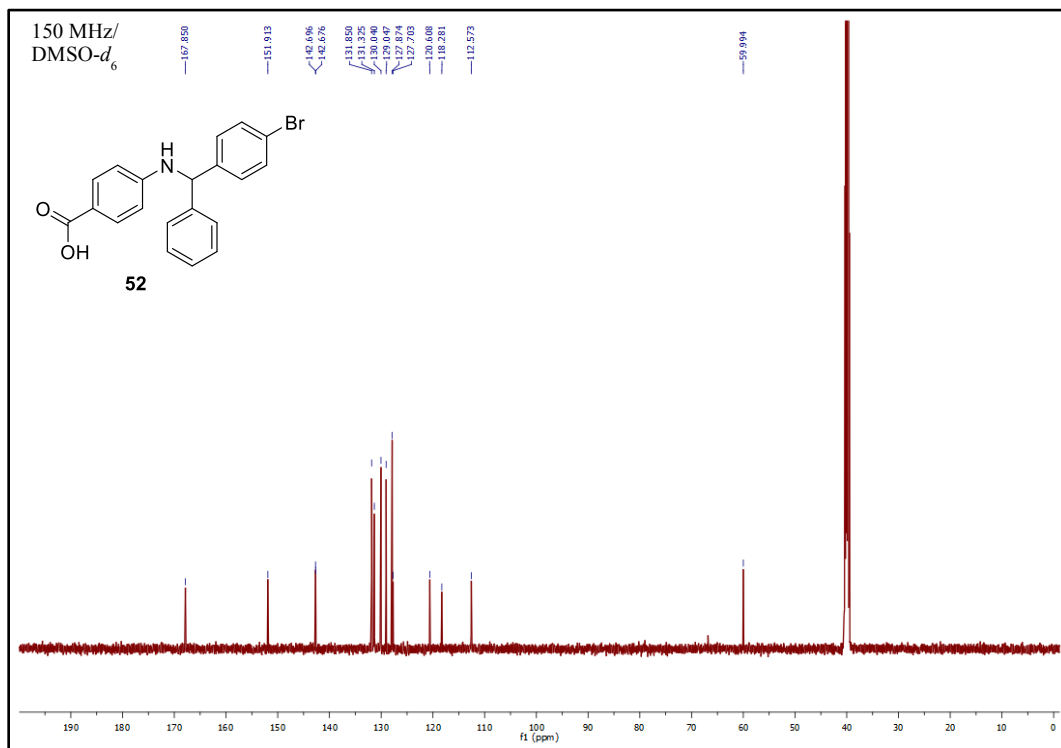

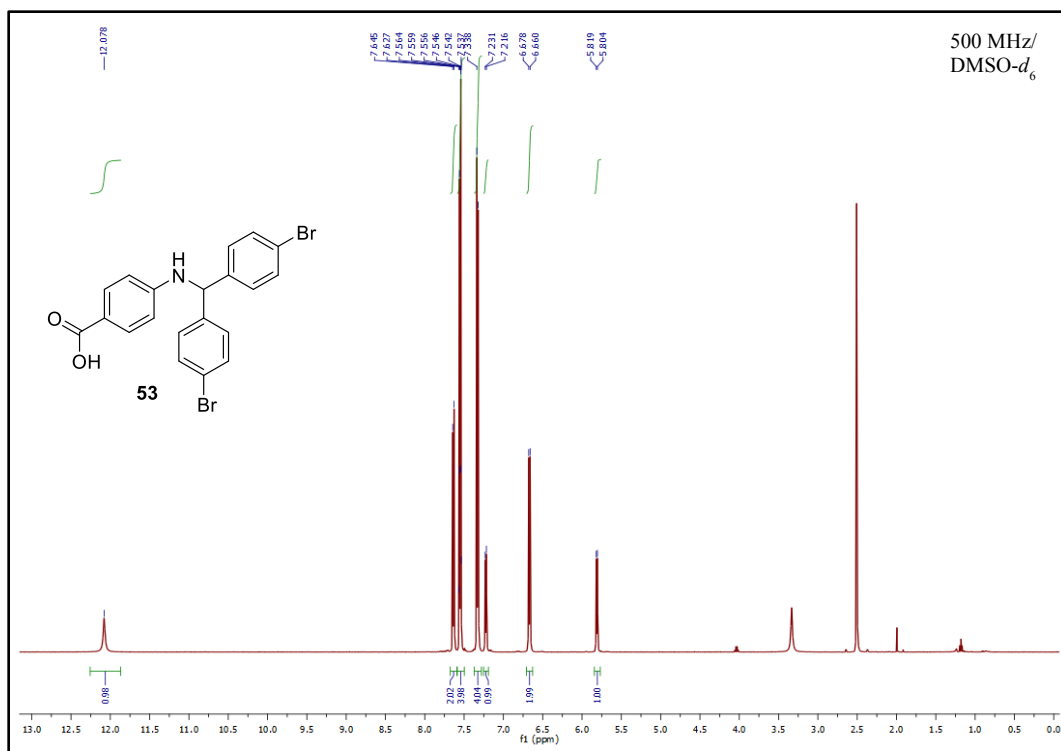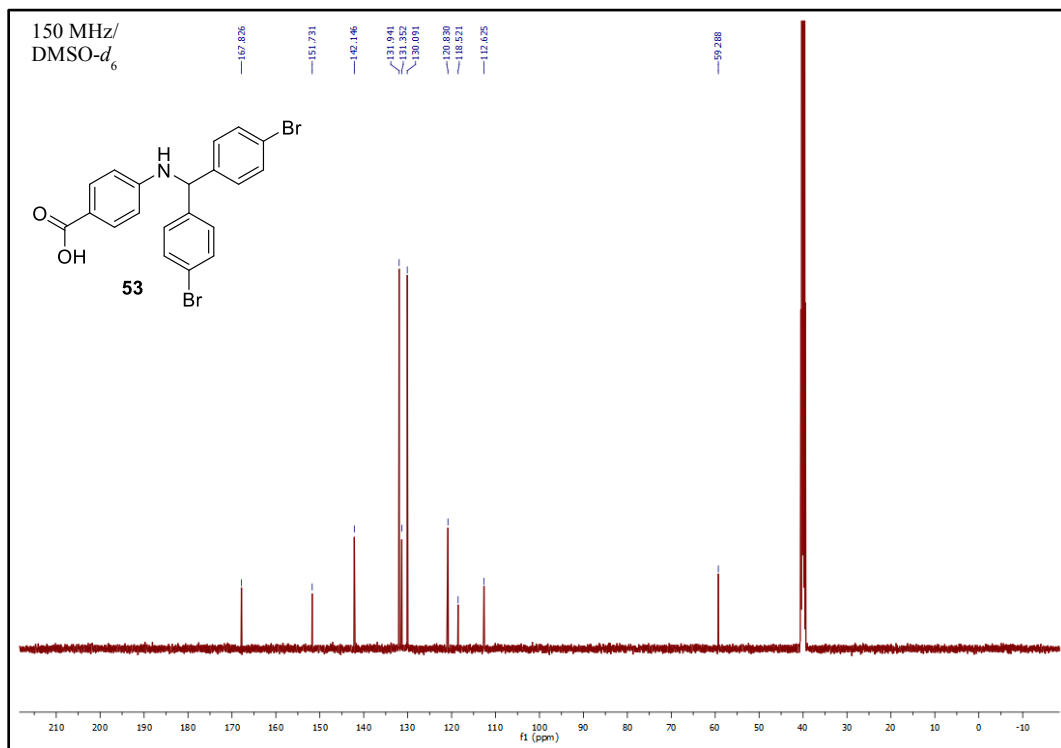



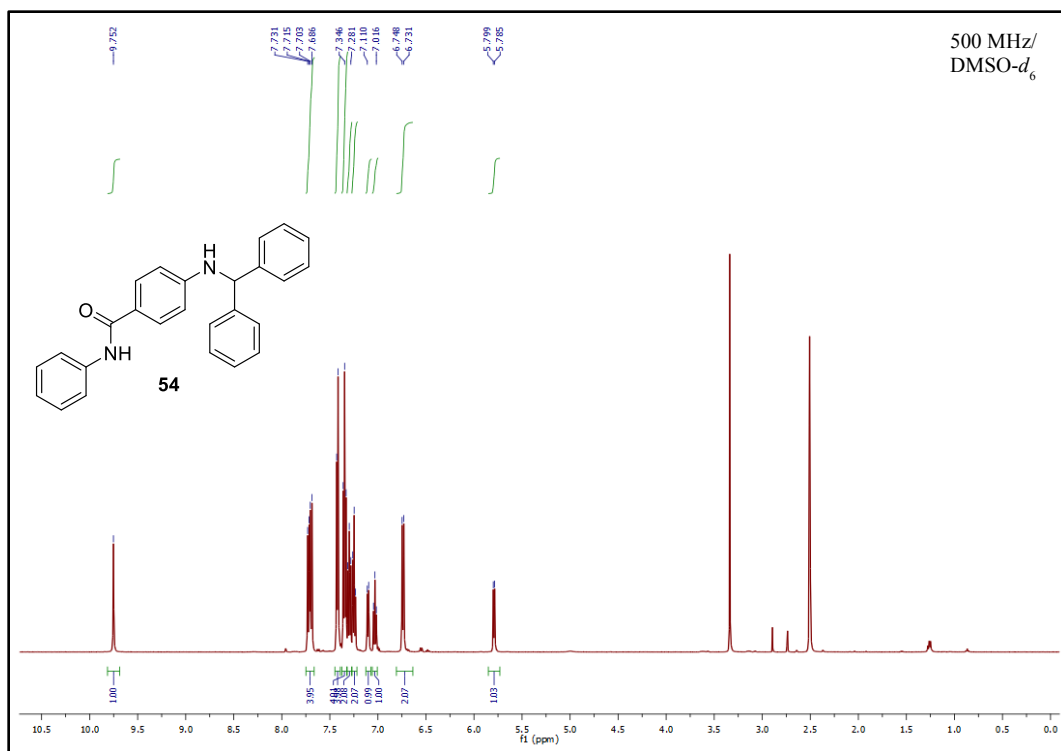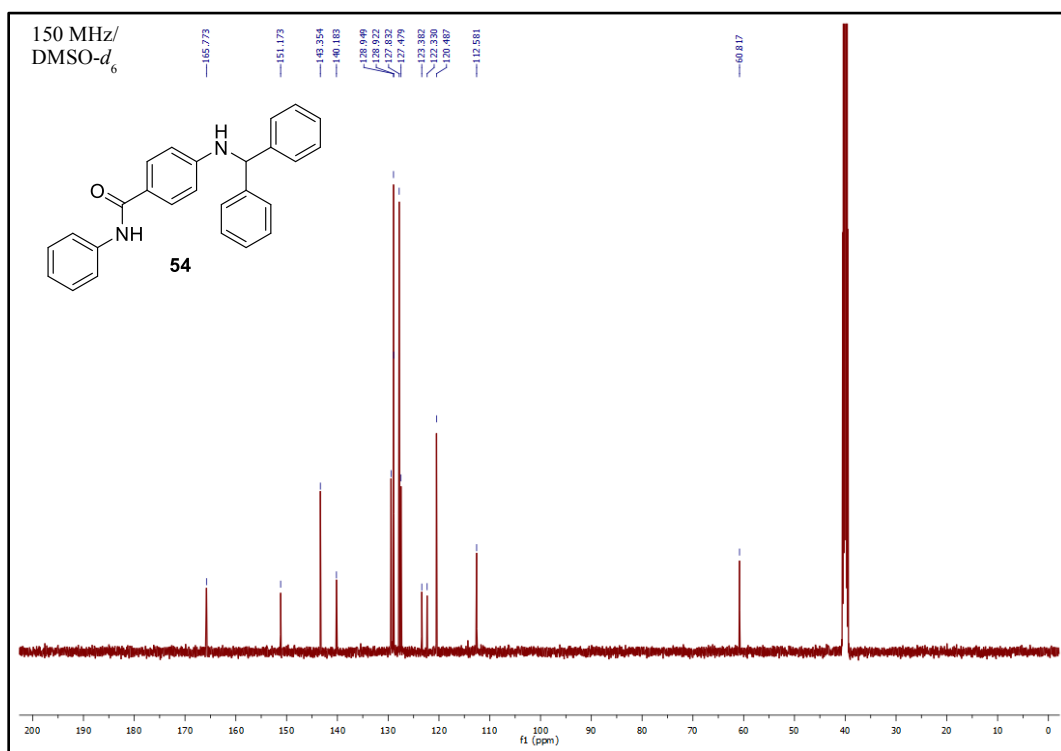

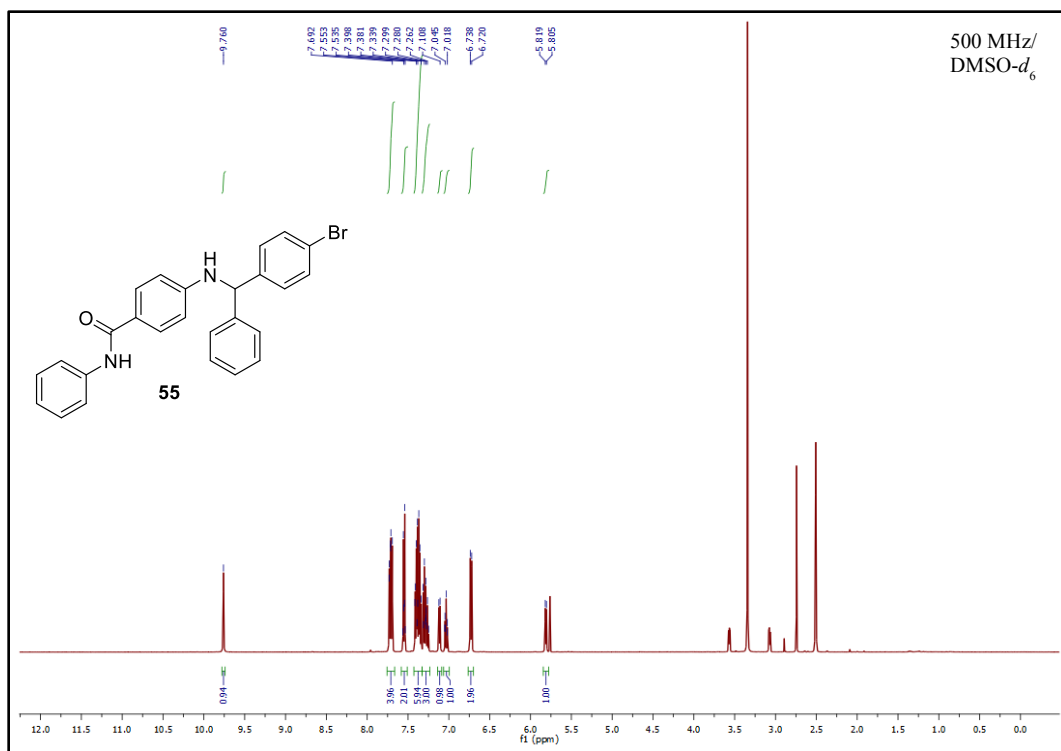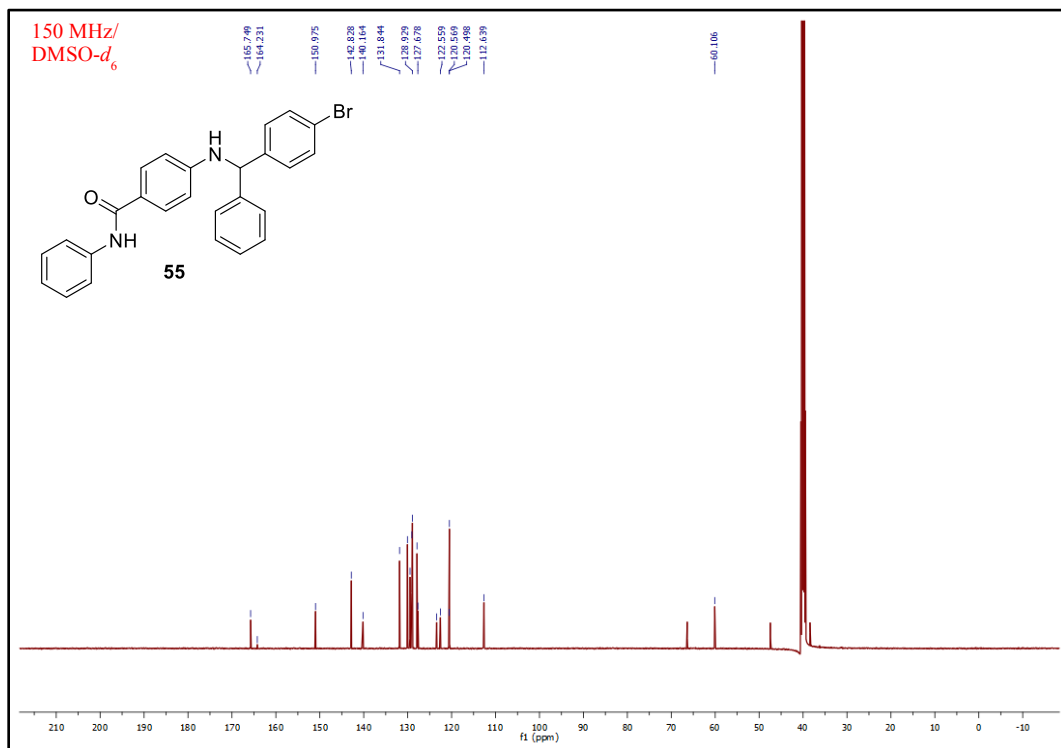

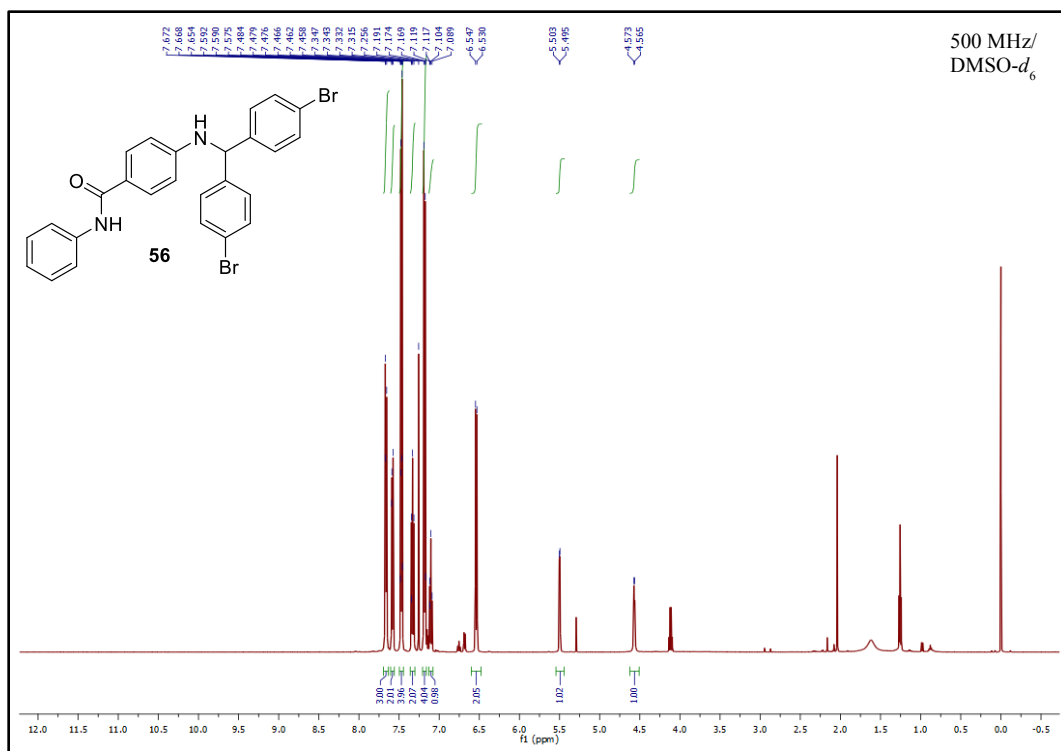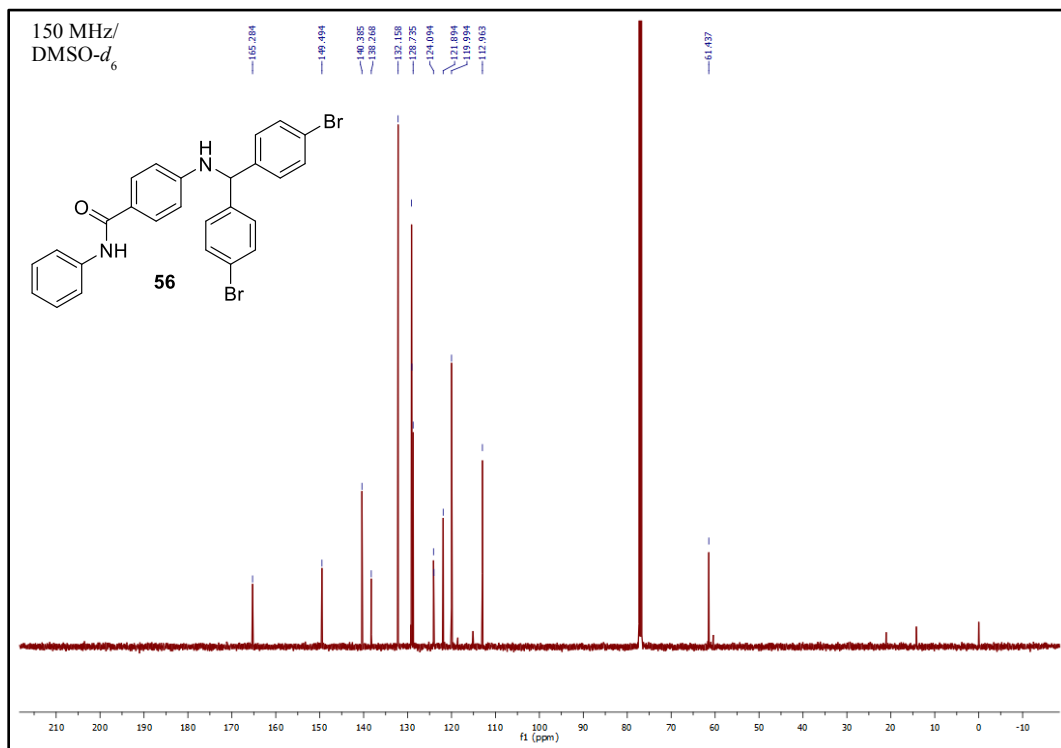

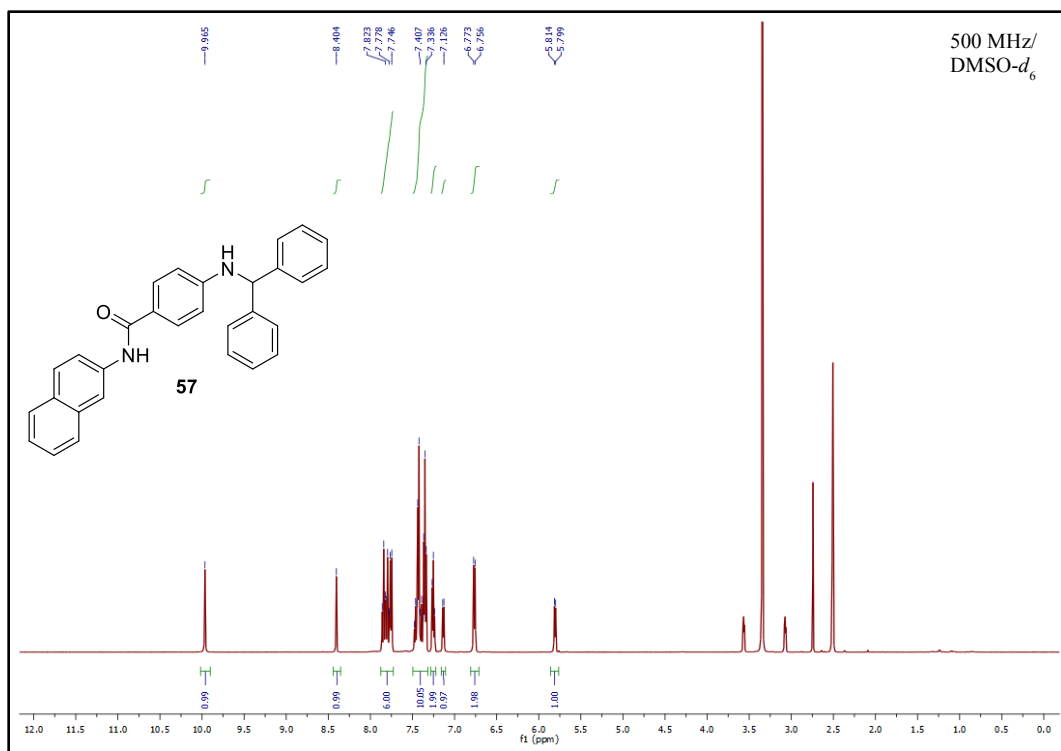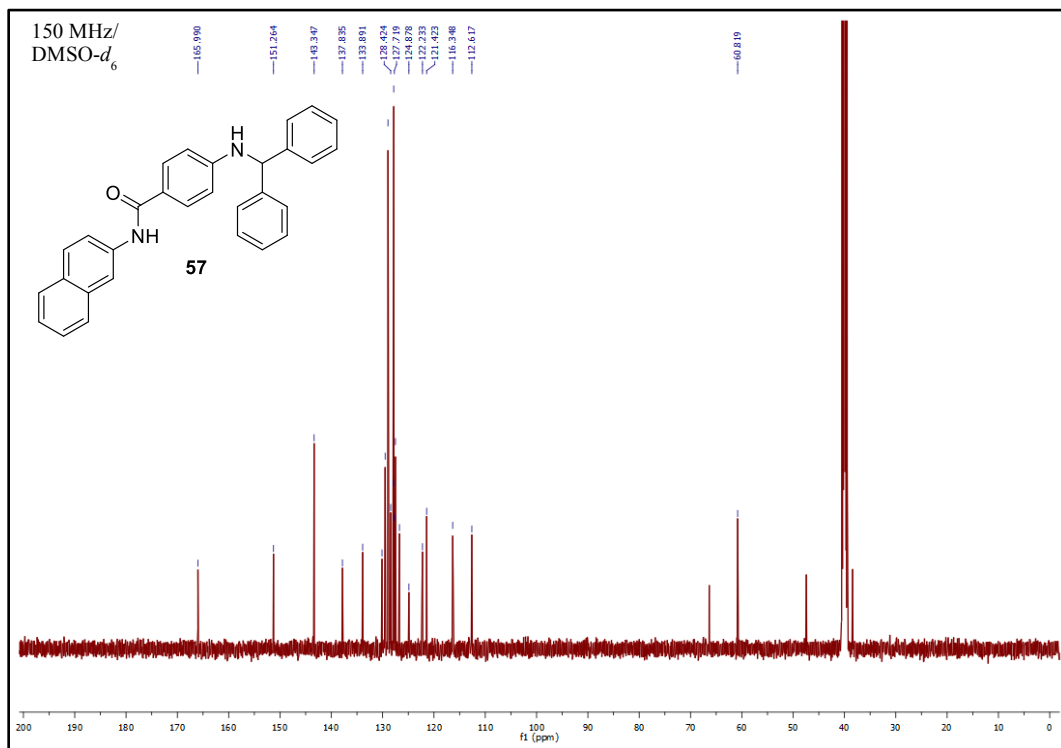

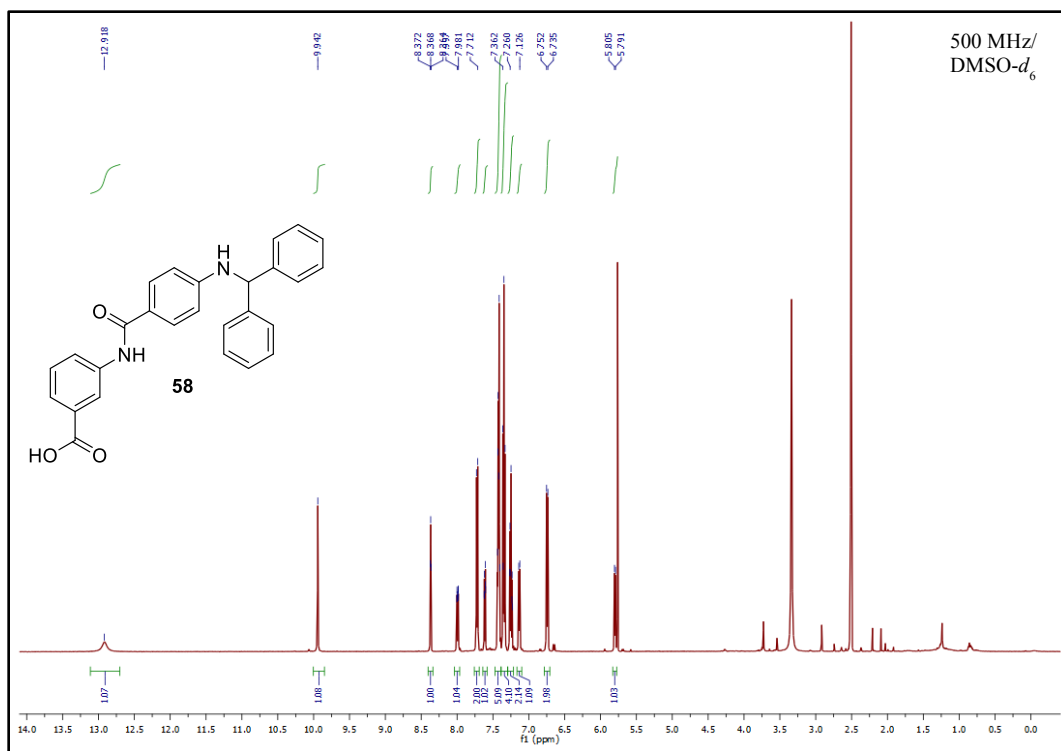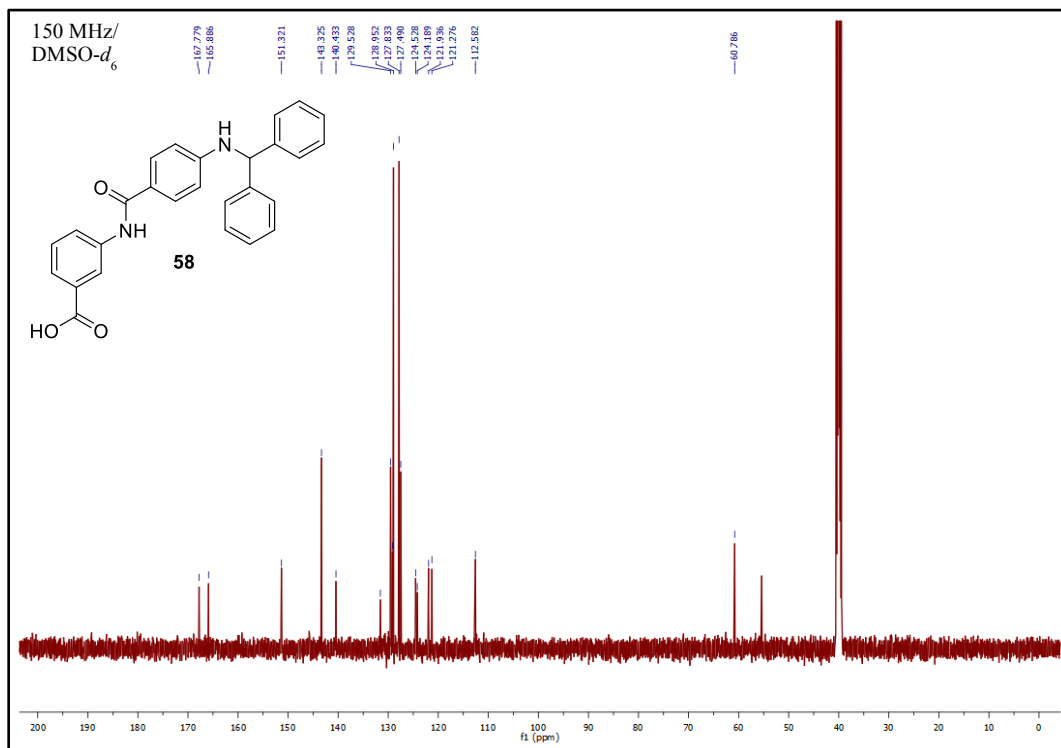

Supplement: NIHMS746040-supplement.pdf [file NIHMS746040-supplement.pdf]
